# Supplementary material
Source: publisher figshare collection journal article supplement (https://gsajournals.figshare.com/articles/dataset/_/12982394)
Supplement: Supplementary file 1 [file 1]

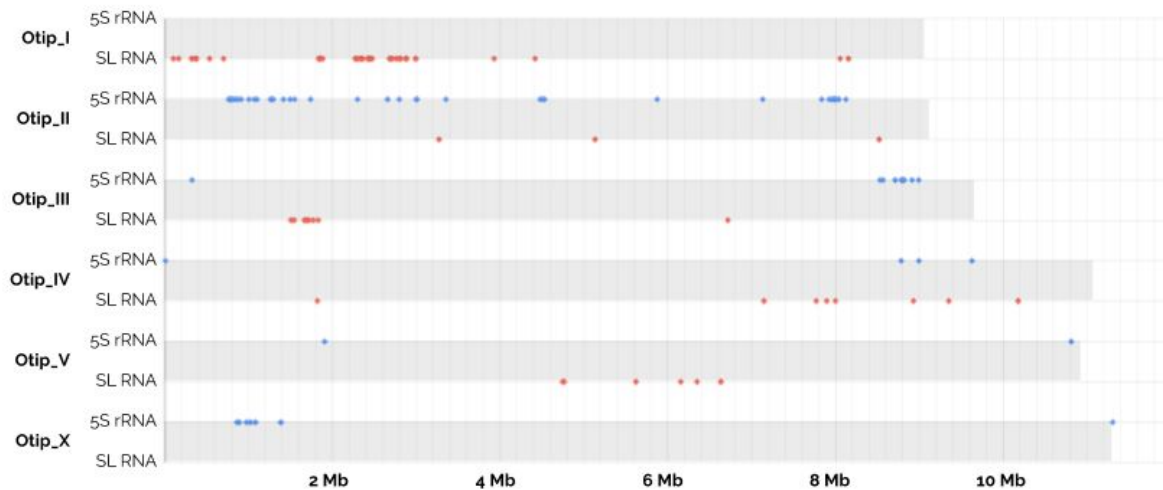

**Figure S2.** Distribution of SL and 5S RNA loci in the *Oscheius tipulae* genome

Spliced leader RNA and 5S ribosomal RNA loci were identified using Rfam (Kalvari et al., 2018) models and Rnammer (Lagesen et al., 2007), and are plotted by position along each of the *O. tipulae* chromosomes.
