# Supplementary material
Source: publisher figshare collection journal article supplement (https://gsajournals.figshare.com/articles/dataset/_/12982394)
Supplement: Supplementary file 1 [file 1]

## Sheet: Table S12
Table S12A: Core data on Niigon-defining locus placement on Meloidogyne chromosomal scaffolds						Table S12B: Scaffold and Nigon			Table S12C: Pivot table of Scaffold and Nigon ORIGINAL										Table S12D: Pivot table of Scaffold and Nigon (unplaced contigs summed)										Table S12E: Pivot table of Scaffold and Nigon by Proportion per Scaffold										Table S12F: Pivot table of Scaffold and Nigon
									COUNTA of Nigon element	Nigon element										Nigon element										Nigon element										Nigon element
Orthogroup	Nigon element	assembly	tID	scaffold		scaffold	Nigon element		scaffold	A	B	C	D	E	N	X	Grand Total		scaffold	A	B	C	D	E	N	X	Total		scaffold	A	B	C	D	E	N	X	Total		scaffold	A	B	C	D	E	N	X
OG0000863	X	meloidogyne_hapla.PRJNA29083.WBPS14	transcript:MhA1_Contig36.frz3.gene5	mh_8		mh_8	X		mh_10.12.18	17	23	12	3	4	3	1	63		mh_10.12.18	17	23	12	3	4	3	1	63		mh_10.12.18	0.269841	0.365079	0.190476	0.047619	0.0634921	0.047619	0.015873	1		mh_10.12.18	0.0553746	0.119171	0.0350877	0.0188679	0.0330579	0.0326087	0.02		b
OG0001457	D	meloidogyne_hapla.PRJNA29083.WBPS14	transcript:MhA1_Contig530.frz3.gene7	mh_2B		mh_2B	D		mh_11	5	3	18	2	3	22	3	56		mh_11	5	3	18	2	3	22	3	56		mh_11	0.0892857	0.0535714	0.321429	0.0357143	0.0535714	0.392857	0.0535714	1		mh_11	0.0162866	0.015544	0.0526316	0.0125786	0.0247934	0.23913	0.06	N	c
OG0001758	D	meloidogyne_hapla.PRJNA29083.WBPS14	transcript:MhA1_Contig1122.frz3.fgene1	mh_2A		mh_2A	D		mh_13A.17	62	13	34	24	14	3	7	157		mh_13A.17	62	13	34	24	14	3	7	157		mh_13A.17	0.394904	0.0828025	0.216561	0.152866	0.089172	0.0191083	0.044586	1		mh_13A.17	0.201954	0.0673575	0.0994152	0.150943	0.115702	0.0326087	0.14	A	cdx
OG0001918	C	meloidogyne_hapla.PRJNA29083.WBPS14	transcript:MhA1_Contig2356.frz3.gene1	mh_MhA1_Contig2356		mh_MhA1_Contig2356	C		mh_13B	11	1	1	16				29		mh_13B	11	1	1	16	0	0	0	29		mh_13B	0.37931	0.0344828	0.0344828	0.551724	0	0	0	1		mh_13B	0.0358306	0.00518135	0.00292398	0.100629	0	0	0		d
OG0001986	C	meloidogyne_hapla.PRJNA29083.WBPS14	transcript:MhA1_Contig468.frz3.gene24	mh_13A.17		mh_13A.17	C		mh_14	1	1	2	1		3		8		mh_14	1	1	2	1	0	3	0	8		mh_14										mh_14
OG0002120	E	meloidogyne_hapla.PRJNA29083.WBPS14	transcript:MhA1_Contig309.frz3.gene25	mh_16		mh_16	E		mh_15	4		3	1	1	6	1	16		mh_15	4	0	3	1	1	6	1	16		mh_15										mh_15
OG0002184	C	meloidogyne_hapla.PRJNA29083.WBPS14	transcript:MhA1_Contig1330.frz3.fgene2	mh_16		mh_16	C		mh_16	6	5	14	5	60	2	1	93		mh_16	6	5	14	5	60	2	1	93		mh_16	0.0645161	0.0537634	0.150538	0.0537634	0.645161	0.0215054	0.0107527	1		mh_16	0.019544	0.0259067	0.0409357	0.0314465	0.495868	0.0217391	0.02	E
OG0002201	C	meloidogyne_hapla.PRJNA29083.WBPS14	transcript:MhA1_Contig1643.frz3.gene5	mh_16		mh_16	C		mh_1A	53	24	11	2	4	3		97		mh_1A	53	24	11	2	4	3	0	97		mh_1A	0.546392	0.247423	0.113402	0.0206186	0.0412371	0.0309278	0	1		mh_1A	0.172638	0.124352	0.0321637	0.0125786	0.0330579	0.0326087	0		ab
OG0002234	A	meloidogyne_hapla.PRJNA29083.WBPS14	transcript:MhA1_Contig228.frz3.gene16	mh_10.12.18		mh_10.12.18	A		mh_1B	61	15	9	6	1	11	1	104		mh_1B	61	15	9	6	1	11	1	104		mh_1B	0.586538	0.144231	0.0865385	0.0576923	0.00961538	0.105769	0.00961538	1		mh_1B	0.198697	0.0777202	0.0263158	0.0377358	0.00826446	0.119565	0.02	A	n
OG0002247	N	meloidogyne_hapla.PRJNA29083.WBPS14	transcript:MhA1_Contig290.frz3.gene10	mh_13A.17		mh_13A.17	N		mh_20	4	2	2	1		1		10		mh_20	4	2	2	1	0	1	0	10		mh_20										mh_20
OG0002268	D	meloidogyne_hapla.PRJNA29083.WBPS14	transcript:MhA1_Contig91.frz3.gene7	mh_13A.17		mh_13A.17	D		mh_21	8	2	9	8	2	6	1	36		mh_21	8	2	9	8	2	6	1	36		mh_21										mh_21
OG0002281	D	meloidogyne_hapla.PRJNA29083.WBPS14	transcript:MhA1_Contig1498.frz3.fgene1	mh_MhA1_Contig1498		mh_MhA1_Contig1498	D		mh_2A	12	11	8	25	4	4		64		mh_2A	12	11	8	25	4	4	0	64		mh_2A	0.1875	0.171875	0.125	0.390625	0.0625	0.0625	0	1		mh_2A	0.0390879	0.0569948	0.0233918	0.157233	0.0330579	0.0434783	0		d
OG0002295	D	meloidogyne_hapla.PRJNA29083.WBPS14	transcript:MhA1_Contig253.frz3.gene52	mh_2B		mh_2B	D		mh_2B	12	25	16	15	6	6		80		mh_2B	12	25	16	15	6	6	0	80		mh_2B	0.15	0.3125	0.2	0.1875	0.075	0.075	0	1		mh_2B	0.0390879	0.129534	0.0467836	0.0943396	0.0495868	0.0652174	0		b
OG0002296	D	meloidogyne_hapla.PRJNA29083.WBPS14	transcript:MhA1_Contig808.frz3.gene1	mh_MhA1_Contig808		mh_MhA1_Contig808	D		mh_3	6	14	31	7	11	4	1	74		mh_3	6	14	31	7	11	4	1	74		mh_3	0.0810811	0.189189	0.418919	0.0945946	0.148649	0.0540541	0.0135135	1		mh_3	0.019544	0.0725389	0.0906433	0.0440252	0.0909091	0.0434783	0.02
OG0002297	D	meloidogyne_hapla.PRJNA29083.WBPS14	transcript:MhA1_Contig1532.frz3.gene10	mh_21		mh_21	D		mh_4	18	3	96	15	2	4		138		mh_4	18	3	96	15	2	4	0	138		mh_4	0.130435	0.0217391	0.695652	0.108696	0.0144928	0.0289855	0	1		mh_4	0.0586319	0.015544	0.280702	0.0943396	0.0165289	0.0434783	0	C
OG0002312	B	meloidogyne_hapla.PRJNA29083.WBPS14	transcript:MhA1_Contig684.frz3.gene15	mh_10.12.18		mh_10.12.18	B		mh_5	4	40	11	21	2	6	1	85		mh_5	4	40	11	21	2	6	1	85		mh_5	0.0470588	0.470588	0.129412	0.247059	0.0235294	0.0705882	0.0117647	1		mh_5	0.0130293	0.207254	0.0321637	0.132075	0.0165289	0.0652174	0.02	B	d
OG0002319	B	meloidogyne_hapla.PRJNA29083.WBPS14	transcript:MhA1_Contig877.frz3.fgene2	mh_5		mh_5	B		mh_6	3	2	37		1	2	13	58		mh_6	3	2	37	0	1	2	13	58		mh_6	0.0517241	0.0344828	0.637931	0	0.0172414	0.0344828	0.224138	1		mh_6	0.00977199	0.0103627	0.108187	0	0.00826446	0.0217391	0.26	X	c
OG0002321	B	meloidogyne_hapla.PRJNA29083.WBPS14	transcript:MhA1_Contig117.frz3.gene26	mh_4		mh_4	B		mh_7	17	6	8	6	6	6	1	50		mh_7	17	6	8	6	6	6	1	50		mh_7	0.34	0.12	0.16	0.12	0.12	0.12	0.02	1		mh_7	0.0553746	0.0310881	0.0233918	0.0377358	0.0495868	0.0652174	0.02
OG0002331	B	meloidogyne_hapla.PRJNA29083.WBPS14	transcript:MhA1_Contig56.frz3.fgene1	mh_1B		mh_1B	B		mh_8	3	3	20	1			19	46		mh_8	3	3	20	1	0	0	19	46		mh_8	0.0652174	0.0652174	0.434783	0.0217391	0	0	0.413043	1		mh_8	0.00977199	0.015544	0.0584795	0.00628931	0	0	0.38	X
OG0002335	B	meloidogyne_hapla.PRJNA29083.WBPS14	transcript:MhA1_Contig253.frz3.gene53	mh_2B		mh_2B	B		mh_MhA1_Contig1						3		3		unplaced contigs	122	64	77	51	49	30	31	424		unplaced contigs	0.287736	0.150943	0.181604	0.120283	0.115566	0.0707547	0.0731132	1
OG0002340	B	meloidogyne_hapla.PRJNA29083.WBPS14	transcript:MhA1_Contig1921.frz3.gene7	mh_3		mh_3	B		mh_MhA1_Contig1023	1					1		2		Total	429	257	419	210	170	122	81	1688												0	0.944625	0.974093	0.953216	0.930818	0.975207	0.826087	0.96
OG0002344	B	meloidogyne_hapla.PRJNA29083.WBPS14	transcript:MhA1_Contig2922.frz3.gene1	mh_MhA1_Contig2922		mh_MhA1_Contig2922	B		mh_MhA1_Contig1038			1					1		Total in Scaffolds	307	193	342	159	121	92	50	1264
OG0002346	B	meloidogyne_hapla.PRJNA29083.WBPS14	transcript:MhA1_Contig2172.frz3.fgene1	mh_MhA1_Contig2172		mh_MhA1_Contig2172	B		mh_MhA1_Contig1049					1			1		Proportion in Scaffolds	0.715618	0.750973	0.816229	0.757143	0.711765	0.754098	0.617284	0.748815
OG0002416	E	meloidogyne_hapla.PRJNA29083.WBPS14	transcript:MhA1_Contig1356.frz3.gene13	mh_16		mh_16	E		mh_MhA1_Contig1056			1					1		Total Nigon number	534	328	519	275	242	174	119	2191
OG0002424	E	meloidogyne_hapla.PRJNA29083.WBPS14	transcript:MhA1_Contig1000.frz3.gene17	mh_2A		mh_2A	E		mh_MhA1_Contig1067	1	1			1			3		M. hapla proportion	0.803371	0.783537	0.807322	0.763636	0.702479	0.701149	0.680672	0.770424
OG0002427	E	meloidogyne_hapla.PRJNA29083.WBPS14	transcript:MhA1_Contig1732.frz3.fgene3	mh_1A		mh_1A	E		mh_MhA1_Contig1075	1							1		M. hapla on scaffolds	0.574906	0.588415	0.65896	0.578182	0.5	0.528736	0.420168	0.576906
OG0002428	E	meloidogyne_hapla.PRJNA29083.WBPS14	transcript:MhA1_Contig1364.frz3.gene5	mh_MhA1_Contig1364		mh_MhA1_Contig1364	E		mh_MhA1_Contig1076	2							2
OG0002443	E	meloidogyne_hapla.PRJNA29083.WBPS14	transcript:MhA1_Contig373.frz3.gene21	mh_10.12.18		mh_10.12.18	E		mh_MhA1_Contig1079						2		2
OG0002448	E	meloidogyne_hapla.PRJNA29083.WBPS14	transcript:MhA1_Contig860.frz3.gene1	mh_16		mh_16	E		mh_MhA1_Contig1084				1				1
OG0002453	E	meloidogyne_hapla.PRJNA29083.WBPS14	transcript:MhA1_Contig1556.frz3.fgene5	mh_16		mh_16	E		mh_MhA1_Contig109	1			1				2
OG0002476	C	meloidogyne_hapla.PRJNA29083.WBPS14	transcript:MhA1_Contig133.frz3.gene24	mh_6		mh_6	C		mh_MhA1_Contig1090	1							1
OG0002478	C	meloidogyne_hapla.PRJNA29083.WBPS14	transcript:MhA1_Contig199.frz3.gene16	mh_21		mh_21	C		mh_MhA1_Contig110	1	1					1	3
OG0002491	C	meloidogyne_hapla.PRJNA29083.WBPS14	transcript:MhA1_Contig90.frz3.gene10	mh_13A.17		mh_13A.17	C		mh_MhA1_Contig1101		1						1
OG0002495	C	meloidogyne_hapla.PRJNA29083.WBPS14	transcript:MhA1_Contig113.frz3.gene37	mh_4		mh_4	C		mh_MhA1_Contig1121	1							1
OG0002510	C	meloidogyne_hapla.PRJNA29083.WBPS14	transcript:MhA1_Contig116.frz3.gene20	mh_4		mh_4	C		mh_MhA1_Contig1137	1		1					2
OG0002512	C	meloidogyne_hapla.PRJNA29083.WBPS14	transcript:MhA1_Contig707.frz3.gene5	mh_MhA1_Contig707		mh_MhA1_Contig707	C		mh_MhA1_Contig1144	1							1
OG0002515	C	meloidogyne_hapla.PRJNA29083.WBPS14	transcript:MhA1_Contig755.frz3.gene5	mh_2A		mh_2A	C		mh_MhA1_Contig1145		1						1
OG0002523	C	meloidogyne_hapla.PRJNA29083.WBPS14	transcript:MhA1_Contig1255.frz3.gene2	mh_MhA1_Contig1255		mh_MhA1_Contig1255	C		mh_MhA1_Contig1160		1						1
OG0002527	C	meloidogyne_hapla.PRJNA29083.WBPS14	transcript:MhA1_Contig194.frz3.gene2	mh_MhA1_Contig194		mh_MhA1_Contig194	C		mh_MhA1_Contig1162							1	1
OG0002531	C	meloidogyne_hapla.PRJNA29083.WBPS14	transcript:MhA1_Contig590.frz3.gene32	mh_1B		mh_1B	C		mh_MhA1_Contig1174	1		1					2
OG0002540	A	meloidogyne_hapla.PRJNA29083.WBPS14	transcript:MhA1_Contig1466.frz3.gene6	mh_MhA1_Contig1466		mh_MhA1_Contig1466	A		mh_MhA1_Contig1194			1				1	2
OG0002542	A	meloidogyne_hapla.PRJNA29083.WBPS14	transcript:MhA1_Contig795.frz3.gene11	mh_MhA1_Contig795		mh_MhA1_Contig795	A		mh_MhA1_Contig1201			1					1
OG0002545	A	meloidogyne_hapla.PRJNA29083.WBPS14	transcript:MhA1_Contig1259.frz3.gene3	mh_MhA1_Contig1259		mh_MhA1_Contig1259	A		mh_MhA1_Contig1225					1			1
OG0002547	A	meloidogyne_hapla.PRJNA29083.WBPS14	transcript:MhA1_Contig1126.frz3.fgene2	mh_2A		mh_2A	A		mh_MhA1_Contig1227					1			1
OG0002562	A	meloidogyne_hapla.PRJNA29083.WBPS14	transcript:MhA1_Contig887.frz3.gene1	mh_13A.17		mh_13A.17	A		mh_MhA1_Contig1228					1			1
OG0002564	A	meloidogyne_hapla.PRJNA29083.WBPS14	transcript:MhA1_Contig580.frz3.gene7	mh_MhA1_Contig580		mh_MhA1_Contig580	A		mh_MhA1_Contig1233		1						1
OG0002569	A	meloidogyne_hapla.PRJNA29083.WBPS14	transcript:MhA1_Contig788.frz3.gene4	mh_MhA1_Contig788		mh_MhA1_Contig788	A		mh_MhA1_Contig1235					2			2
OG0002573	A	meloidogyne_hapla.PRJNA29083.WBPS14	transcript:MhA1_Contig898.frz3.gene5	mh_1B		mh_1B	A		mh_MhA1_Contig1242							1	1
OG0002574	A	meloidogyne_hapla.PRJNA29083.WBPS14	transcript:MhA1_Contig819.frz3.gene12	mh_1A		mh_1A	A		mh_MhA1_Contig1247	1							1
OG0002575	A	meloidogyne_hapla.PRJNA29083.WBPS14	transcript:MhA1_Contig130.frz3.gene1	mh_13A.17		mh_13A.17	A		mh_MhA1_Contig1248	1							1
OG0002588	C	meloidogyne_hapla.PRJNA29083.WBPS14	transcript:MhA1_Contig334.frz3.gene20	mh_7		mh_7	C		mh_MhA1_Contig1250	3							3
OG0002596	A	meloidogyne_hapla.PRJNA29083.WBPS14	transcript:MhA1_Contig1076.frz3.gene4	mh_MhA1_Contig1076		mh_MhA1_Contig1076	A		mh_MhA1_Contig1254		2						2
OG0002597	A	meloidogyne_hapla.PRJNA29083.WBPS14	transcript:MhA1_Contig353.frz3.fgene1	mh_13B		mh_13B	A		mh_MhA1_Contig1255			1					1
OG0002601	A	meloidogyne_hapla.PRJNA29083.WBPS14	transcript:MhA1_Contig76.frz3.gene16	mh_1B		mh_1B	A		mh_MhA1_Contig1257		2						2
OG0002610	N	meloidogyne_hapla.PRJNA29083.WBPS14	transcript:MhA1_Contig874.frz3.fgene1	mh_7		mh_7	N		mh_MhA1_Contig1259	1		1					2
OG0002613	N	meloidogyne_hapla.PRJNA29083.WBPS14	transcript:MhA1_Contig90.frz3.gene5	mh_13A.17		mh_13A.17	N		mh_MhA1_Contig1271					1			1
OG0002623	C	meloidogyne_hapla.PRJNA29083.WBPS14	transcript:MhA1_Contig1037.frz3.gene2	mh_10.12.18		mh_10.12.18	C		mh_MhA1_Contig1281				1				1
OG0002625	A	meloidogyne_hapla.PRJNA29083.WBPS14	transcript:MhA1_Contig840.frz3.gene15	mh_1B		mh_1B	A		mh_MhA1_Contig1282	1	1						2
OG0002627	C	meloidogyne_hapla.PRJNA29083.WBPS14	transcript:MhA1_Contig261.frz3.gene14	mh_2B		mh_2B	C		mh_MhA1_Contig1285		1						1
OG0002631	A	meloidogyne_hapla.PRJNA29083.WBPS14	transcript:MhA1_Contig1644.frz3.gene5	mh_MhA1_Contig1644		mh_MhA1_Contig1644	A		mh_MhA1_Contig1303					1			1
OG0002642	D	meloidogyne_hapla.PRJNA29083.WBPS14	transcript:MhA1_Contig755.frz3.gene16	mh_2A		mh_2A	D		mh_MhA1_Contig131	2	3						5
OG0002643	D	meloidogyne_hapla.PRJNA29083.WBPS14	transcript:MhA1_Contig81.frz3.gene14	mh_MhA1_Contig81		mh_MhA1_Contig81	D		mh_MhA1_Contig1326						1		1
OG0002655	D	meloidogyne_hapla.PRJNA29083.WBPS14	transcript:MhA1_Contig255.frz3.gene13	mh_13A.17		mh_13A.17	D		mh_MhA1_Contig1332	2							2
OG0002686	D	meloidogyne_hapla.PRJNA29083.WBPS14	transcript:MhA1_Contig624.frz3.gene3	mh_5		mh_5	D		mh_MhA1_Contig1352			1	2				3
OG0002688	D	meloidogyne_hapla.PRJNA29083.WBPS14	transcript:MhA1_Contig590.20	mh_1B		mh_1B	D		mh_MhA1_Contig1358	2	1		1	1			5
OG0002691	D	meloidogyne_hapla.PRJNA29083.WBPS14	transcript:MhA1_Contig228.frz3.gene15	mh_10.12.18		mh_10.12.18	D		mh_MhA1_Contig1363					2			2
OG0002711	D	meloidogyne_hapla.PRJNA29083.WBPS14	transcript:MhA1_Contig1000.frz3.fgene3	mh_2A		mh_2A	D		mh_MhA1_Contig1364					1			1
OG0002712	B	meloidogyne_hapla.PRJNA29083.WBPS14	transcript:MhA1_Contig1691.frz3.gene8	mh_2A		mh_2A	B		mh_MhA1_Contig1366			1					1
OG0002717	B	meloidogyne_hapla.PRJNA29083.WBPS14	transcript:MhA1_Contig2268.frz3.gene1	mh_MhA1_Contig2268		mh_MhA1_Contig2268	B		mh_MhA1_Contig139			1					1
OG0002726	B	meloidogyne_hapla.PRJNA29083.WBPS14	transcript:MhA1_Contig1763.frz3.gene7	mh_2A		mh_2A	B		mh_MhA1_Contig1390			1	1				2
OG0002729	B	meloidogyne_hapla.PRJNA29083.WBPS14	transcript:MhA1_Contig825.frz3.gene1	mh_2B		mh_2B	B		mh_MhA1_Contig1391				1				1
OG0002751	B	meloidogyne_hapla.PRJNA29083.WBPS14	transcript:MhA1_Contig1446.frz3.fgene2	mh_MhA1_Contig1446		mh_MhA1_Contig1446	B		mh_MhA1_Contig1392				1				1
OG0002755	B	meloidogyne_hapla.PRJNA29083.WBPS14	transcript:MhA1_Contig2458.frz3.gene2	mh_MhA1_Contig2458		mh_MhA1_Contig2458	B		mh_MhA1_Contig1393							1	1
OG0002756	B	meloidogyne_hapla.PRJNA29083.WBPS14	transcript:MhA1_Contig877.frz3.fgene5	mh_5		mh_5	B		mh_MhA1_Contig1394							1	1
OG0002861	E	meloidogyne_hapla.PRJNA29083.WBPS14	transcript:MhA1_Contig860.frz3.gene20	mh_16		mh_16	E		mh_MhA1_Contig1430	1							1
OG0002871	E	meloidogyne_hapla.PRJNA29083.WBPS14	transcript:MhA1_Contig194.frz3.gene69	mh_MhA1_Contig194		mh_MhA1_Contig194	E		mh_MhA1_Contig1433			1					1
OG0002877	E	meloidogyne_hapla.PRJNA29083.WBPS14	transcript:MhA1_Contig95.frz3.gene3	mh_13A.17		mh_13A.17	E		mh_MhA1_Contig1443							1	1
OG0002883	E	meloidogyne_hapla.PRJNA29083.WBPS14	transcript:MhA1_Contig1356.frz3.fgene2	mh_16		mh_16	E		mh_MhA1_Contig1446		1						1
OG0002887	E	meloidogyne_hapla.PRJNA29083.WBPS14	transcript:MhA1_Contig228.frz3.gene13	mh_10.12.18		mh_10.12.18	E		mh_MhA1_Contig1460					1			1
OG0002889	E	meloidogyne_hapla.PRJNA29083.WBPS14	transcript:MhA1_Contig1356.frz3.gene14	mh_16		mh_16	E		mh_MhA1_Contig1462		1						1
OG0002894	E	meloidogyne_hapla.PRJNA29083.WBPS14	transcript:MhA1_Contig2508.frz3.fgene1	mh_MhA1_Contig2508		mh_MhA1_Contig2508	E		mh_MhA1_Contig1466	3							3
OG0002896	E	meloidogyne_hapla.PRJNA29083.WBPS14	transcript:MhA1_Contig118.frz3.gene90	mh_16		mh_16	E		mh_MhA1_Contig1487			1					1
OG0002897	E	meloidogyne_hapla.PRJNA29083.WBPS14	transcript:MhA1_Contig1235.frz3.gene2	mh_MhA1_Contig1235		mh_MhA1_Contig1235	E		mh_MhA1_Contig1498				1				1
OG0002903	E	meloidogyne_hapla.PRJNA29083.WBPS14	transcript:MhA1_Contig1761.frz3.gene9	mh_6		mh_6	E		mh_MhA1_Contig1499		2			2			4
OG0002915	E	meloidogyne_hapla.PRJNA29083.WBPS14	transcript:MhA1_Contig1362.frz3.gene2	mh_16		mh_16	E		mh_MhA1_Contig1529			2					2
OG0002927	N	meloidogyne_hapla.PRJNA29083.WBPS14	transcript:MhA1_Contig271.frz3.gene61	mh_5		mh_5	N		mh_MhA1_Contig1544	1							1
OG0002932	C	meloidogyne_hapla.PRJNA29083.WBPS14	transcript:MhA1_Contig133.frz3.gene23	mh_6		mh_6	C		mh_MhA1_Contig1554			1					1
OG0002933	C	meloidogyne_hapla.PRJNA29083.WBPS14	transcript:MhA1_Contig874.frz3.fgene2	mh_7		mh_7	C		mh_MhA1_Contig1561				1				1
OG0002934	C	meloidogyne_hapla.PRJNA29083.WBPS14	transcript:MhA1_Contig1032.frz3.gene27	mh_2B		mh_2B	C		mh_MhA1_Contig1577					1			1
OG0002937	C	meloidogyne_hapla.PRJNA29083.WBPS14	transcript:MhA1_Contig113.frz3.fgene2	mh_4		mh_4	C		mh_MhA1_Contig1588					1			1
OG0002941	C	meloidogyne_hapla.PRJNA29083.WBPS14	transcript:MhA1_Contig915.frz3.gene16	mh_4		mh_4	C		mh_MhA1_Contig1596				1				1
OG0002943	C	meloidogyne_hapla.PRJNA29083.WBPS14	transcript:MhA1_Contig2970.frz3.gene2	mh_MhA1_Contig2970		mh_MhA1_Contig2970	C		mh_MhA1_Contig1604				1				1
OG0002944	C	meloidogyne_hapla.PRJNA29083.WBPS14	transcript:MhA1_Contig306.frz3.gene12	mh_4		mh_4	C		mh_MhA1_Contig1605			1					1
OG0002957	N	meloidogyne_hapla.PRJNA29083.WBPS14	transcript:MhA1_Contig373.frz3.gene28	mh_10.12.18		mh_10.12.18	N		mh_MhA1_Contig1607	1							1
OG0002958	C	meloidogyne_hapla.PRJNA29083.WBPS14	transcript:MhA1_Contig1055.frz3.gene15	mh_13A.17		mh_13A.17	C		mh_MhA1_Contig1622	1							1
OG0002961	C	meloidogyne_hapla.PRJNA29083.WBPS14	transcript:MhA1_Contig408.frz3.gene1	mh_MhA1_Contig408		mh_MhA1_Contig408	C		mh_MhA1_Contig164	1							1
OG0002968	N	meloidogyne_hapla.PRJNA29083.WBPS14	transcript:MhA1_Contig618.frz3.gene29	mh_11		mh_11	N		mh_MhA1_Contig1644	1							1
OG0002975	C	meloidogyne_hapla.PRJNA29083.WBPS14	transcript:MhA1_Contig933.frz3.gene13	mh_16		mh_16	C		mh_MhA1_Contig1665		2						2
OG0002976	C	meloidogyne_hapla.PRJNA29083.WBPS14	transcript:MhA1_Contig253.frz3.gene26	mh_2B		mh_2B	C		mh_MhA1_Contig1679	1	1						2
OG0002978	C	meloidogyne_hapla.PRJNA29083.WBPS14	transcript:MhA1_Contig121.frz3.fgene5	mh_11		mh_11	C		mh_MhA1_Contig1683			1					1
OG0002979	C	meloidogyne_hapla.PRJNA29083.WBPS14	transcript:MhA1_Contig1375.frz3.gene2	mh_8		mh_8	C		mh_MhA1_Contig1686				1				1
OG0002980	C	meloidogyne_hapla.PRJNA29083.WBPS14	transcript:MhA1_Contig325.frz3.gene8	mh_MhA1_Contig325		mh_MhA1_Contig325	C		mh_MhA1_Contig1688			1					1
OG0002981	C	meloidogyne_hapla.PRJNA29083.WBPS14	transcript:MhA1_Contig725.frz3.fgene1	mh_MhA1_Contig725		mh_MhA1_Contig725	C		mh_MhA1_Contig1697	2							2
OG0002982	C	meloidogyne_hapla.PRJNA29083.WBPS14	transcript:MhA1_Contig306.frz3.gene5	mh_4		mh_4	C		mh_MhA1_Contig1709							1	1
OG0002985	N	meloidogyne_hapla.PRJNA29083.WBPS14	transcript:MhA1_Contig239.frz3.gene31	mh_11		mh_11	N		mh_MhA1_Contig1719		1						1
OG0002994	N	meloidogyne_hapla.PRJNA29083.WBPS14	transcript:MhA1_Contig0.frz3.fgene9	mh_15		mh_15	N		mh_MhA1_Contig1737					1			1
OG0003006	C	meloidogyne_hapla.PRJNA29083.WBPS14	transcript:MhA1_Contig417.frz3.gene18	mh_2B		mh_2B	C		mh_MhA1_Contig1744					1			1
OG0003012	N	meloidogyne_hapla.PRJNA29083.WBPS14	transcript:MhA1_Contig1079.frz3.fgene1	mh_MhA1_Contig1079		mh_MhA1_Contig1079	N		mh_MhA1_Contig1750							1	1
OG0003016	C	meloidogyne_hapla.PRJNA29083.WBPS14	transcript:MhA1_Contig133.frz3.fgene4	mh_6		mh_6	C		mh_MhA1_Contig1751							1	1
OG0003019	C	meloidogyne_hapla.PRJNA29083.WBPS14	transcript:MhA1_Contig20.frz3.gene24	mh_2A		mh_2A	C		mh_MhA1_Contig1753					1			1
OG0003021	C	meloidogyne_hapla.PRJNA29083.WBPS14	transcript:MhA1_Contig1032.frz3.gene8	mh_2B		mh_2B	C		mh_MhA1_Contig1756			1					1
OG0003022	C	meloidogyne_hapla.PRJNA29083.WBPS14	transcript:MhA1_Contig194.frz3.gene38	mh_MhA1_Contig194		mh_MhA1_Contig194	C		mh_MhA1_Contig1767		1						1
OG0003024	C	meloidogyne_hapla.PRJNA29083.WBPS14	transcript:MhA1_Contig147.frz3.gene69	mh_6		mh_6	C		mh_MhA1_Contig1777		1						1
OG0003027	C	meloidogyne_hapla.PRJNA29083.WBPS14	transcript:MhA1_Contig46.frz3.gene13	mh_4		mh_4	C		mh_MhA1_Contig1780			1					1
OG0003028	C	meloidogyne_hapla.PRJNA29083.WBPS14	transcript:MhA1_Contig45.frz3.gene9	mh_4		mh_4	C		mh_MhA1_Contig1791						1		1
OG0003031	C	meloidogyne_hapla.PRJNA29083.WBPS14	transcript:MhA1_Contig676.frz3.gene6	mh_MhA1_Contig676		mh_MhA1_Contig676	C		mh_MhA1_Contig1793				1				1
OG0003032	A	meloidogyne_hapla.PRJNA29083.WBPS14	transcript:MhA1_Contig7.frz3.gene22	mh_15		mh_15	A		mh_MhA1_Contig1803		1						1
OG0003036	A	meloidogyne_hapla.PRJNA29083.WBPS14	transcript:MhA1_Contig470.frz3.gene3	mh_MhA1_Contig470		mh_MhA1_Contig470	A		mh_MhA1_Contig1805						1		1
OG0003037	A	meloidogyne_hapla.PRJNA29083.WBPS14	transcript:MhA1_Contig1077.frz3.gene7	mh_1B		mh_1B	A		mh_MhA1_Contig183	1				1			2
OG0003038	A	meloidogyne_hapla.PRJNA29083.WBPS14	transcript:MhA1_Contig117.frz3.gene16	mh_4		mh_4	A		mh_MhA1_Contig1835					2			2
OG0003039	A	meloidogyne_hapla.PRJNA29083.WBPS14	transcript:MhA1_Contig875.frz3.gene7	mh_7		mh_7	A		mh_MhA1_Contig1836				1				1
OG0003041	A	meloidogyne_hapla.PRJNA29083.WBPS14	transcript:MhA1_Contig1916.frz3.gene4	mh_MhA1_Contig1916		mh_MhA1_Contig1916	A		mh_MhA1_Contig186					1			1
OG0003042	A	meloidogyne_hapla.PRJNA29083.WBPS14	transcript:MhA1_Contig1916.frz3.fgene2	mh_MhA1_Contig1916		mh_MhA1_Contig1916	A		mh_MhA1_Contig187	1							1
OG0003045	A	meloidogyne_hapla.PRJNA29083.WBPS14	transcript:MhA1_Contig208.frz3.fgene2	mh_21		mh_21	A		mh_MhA1_Contig1878		1						1
OG0003046	A	meloidogyne_hapla.PRJNA29083.WBPS14	transcript:MhA1_Contig515.frz3.gene23	mh_10.12.18		mh_10.12.18	A		mh_MhA1_Contig1890	1							1
OG0003052	A	meloidogyne_hapla.PRJNA29083.WBPS14	transcript:MhA1_Contig405.frz3.gene22	mh_20		mh_20	A		mh_MhA1_Contig1896	1							1
OG0003058	A	meloidogyne_hapla.PRJNA29083.WBPS14	transcript:MhA1_Contig2540.frz3.gene5	mh_2B		mh_2B	A		mh_MhA1_Contig1913	1							1
OG0003059	A	meloidogyne_hapla.PRJNA29083.WBPS14	transcript:MhA1_Contig684.frz3.gene30	mh_10.12.18		mh_10.12.18	A		mh_MhA1_Contig1916	2							2
OG0003060	A	meloidogyne_hapla.PRJNA29083.WBPS14	transcript:MhA1_Contig568.frz3.gene8	mh_10.12.18		mh_10.12.18	A		mh_MhA1_Contig193				1		1		2
OG0003064	A	meloidogyne_hapla.PRJNA29083.WBPS14	transcript:MhA1_Contig596.frz3.gene19	mh_MhA1_Contig596		mh_MhA1_Contig596	A		mh_MhA1_Contig194	3	3	5	1	2	2	1	17
OG0003066	A	meloidogyne_hapla.PRJNA29083.WBPS14	transcript:MhA1_Contig596.frz3.gene6	mh_MhA1_Contig596		mh_MhA1_Contig596	A		mh_MhA1_Contig1960	3							3
OG0003071	C	meloidogyne_hapla.PRJNA29083.WBPS14	transcript:MhA1_Contig730.frz3.gene2	mh_13A.17		mh_13A.17	C		mh_MhA1_Contig1972							1	1
OG0003072	C	meloidogyne_hapla.PRJNA29083.WBPS14	transcript:MhA1_Contig261.frz3.gene20	mh_2B		mh_2B	C		mh_MhA1_Contig1976				1				1
OG0003076	A	meloidogyne_hapla.PRJNA29083.WBPS14	transcript:MhA1_Contig2222.frz3.gene3	mh_MhA1_Contig2222		mh_MhA1_Contig2222	A		mh_MhA1_Contig1978				1				1
OG0003077	A	meloidogyne_hapla.PRJNA29083.WBPS14	transcript:MhA1_Contig94.frz3.gene8	mh_13A.17		mh_13A.17	A		mh_MhA1_Contig1979		1						1
OG0003082	A	meloidogyne_hapla.PRJNA29083.WBPS14	transcript:MhA1_Contig31.frz3.gene14	mh_1B		mh_1B	A		mh_MhA1_Contig1987					2			2
OG0003085	A	meloidogyne_hapla.PRJNA29083.WBPS14	transcript:MhA1_Contig78.frz3.fgene1	mh_5		mh_5	A		mh_MhA1_Contig1995					1			1
OG0003086	A	meloidogyne_hapla.PRJNA29083.WBPS14	transcript:MhA1_Contig310.frz3.gene17	mh_MhA1_Contig310		mh_MhA1_Contig310	A		mh_MhA1_Contig1998	2							2
OG0003089	A	meloidogyne_hapla.PRJNA29083.WBPS14	transcript:MhA1_Contig418.frz3.gene7	mh_2B		mh_2B	A		mh_MhA1_Contig202			1	1			1	3
OG0003092	A	meloidogyne_hapla.PRJNA29083.WBPS14	transcript:MhA1_Contig261.frz3.gene26	mh_2B		mh_2B	A		mh_MhA1_Contig2030		1						1
OG0003095	A	meloidogyne_hapla.PRJNA29083.WBPS14	transcript:MhA1_Contig1998.frz3.gene5	mh_MhA1_Contig1998		mh_MhA1_Contig1998	A		mh_MhA1_Contig2031			1					1
OG0003096	A	meloidogyne_hapla.PRJNA29083.WBPS14	transcript:MhA1_Contig400.frz3.gene17	mh_1A		mh_1A	A		mh_MhA1_Contig2033			1					1
OG0003099	A	meloidogyne_hapla.PRJNA29083.WBPS14	transcript:MhA1_Contig1189.frz3.gene16	mh_2A		mh_2A	A		mh_MhA1_Contig2034	1		1					2
OG0003102	A	meloidogyne_hapla.PRJNA29083.WBPS14	transcript:MhA1_Contig163.frz3.gene29	mh_13A.17		mh_13A.17	A		mh_MhA1_Contig2036			1					1
OG0003103	C	meloidogyne_hapla.PRJNA29083.WBPS14	transcript:MhA1_Contig541.frz3.gene24	mh_4		mh_4	C		mh_MhA1_Contig2043						1		1
OG0003112	C	meloidogyne_hapla.PRJNA29083.WBPS14	transcript:MhA1_Contig1263.frz3.gene6	mh_4		mh_4	C		mh_MhA1_Contig2062					1			1
OG0003115	C	meloidogyne_hapla.PRJNA29083.WBPS14	transcript:MhA1_Contig2786.frz3.gene1	mh_MhA1_Contig2786		mh_MhA1_Contig2786	C		mh_MhA1_Contig2064							1	1
OG0003116	C	meloidogyne_hapla.PRJNA29083.WBPS14	transcript:MhA1_Contig260.frz3.gene1	mh_2B		mh_2B	C		mh_MhA1_Contig2083					1			1
OG0003118	C	meloidogyne_hapla.PRJNA29083.WBPS14	transcript:MhA1_Contig133.frz3.fgene3	mh_6		mh_6	C		mh_MhA1_Contig2086		1						1
OG0003119	C	meloidogyne_hapla.PRJNA29083.WBPS14	transcript:MhA1_Contig756.frz3.fgene1	mh_21		mh_21	C		mh_MhA1_Contig2101					1			1
OG0003122	C	meloidogyne_hapla.PRJNA29083.WBPS14	transcript:MhA1_Contig1037.frz3.gene4	mh_10.12.18		mh_10.12.18	C		mh_MhA1_Contig2127				1				1
OG0003126	A	meloidogyne_hapla.PRJNA29083.WBPS14	transcript:MhA1_Contig470.frz3.fgene1	mh_MhA1_Contig470		mh_MhA1_Contig470	A		mh_MhA1_Contig213	1	2	1	1	1	3		9
OG0003127	A	meloidogyne_hapla.PRJNA29083.WBPS14	transcript:MhA1_Contig334.frz3.fgene1	mh_7		mh_7	A		mh_MhA1_Contig214	2	1	1	1				5
OG0003129	A	meloidogyne_hapla.PRJNA29083.WBPS14	transcript:MhA1_Contig132.frz3.gene25	mh_13A.17		mh_13A.17	A		mh_MhA1_Contig2164			2					2
OG0003136	A	meloidogyne_hapla.PRJNA29083.WBPS14	transcript:MhA1_Contig2330.frz3.gene1	mh_2A		mh_2A	A		mh_MhA1_Contig217			1					1
OG0003141	A	meloidogyne_hapla.PRJNA29083.WBPS14	transcript:MhA1_Contig123.frz3.fgene8	mh_13A.17		mh_13A.17	A		mh_MhA1_Contig2172		1						1
OG0003142	A	meloidogyne_hapla.PRJNA29083.WBPS14	transcript:MhA1_Contig697.frz3.gene17	mh_1B		mh_1B	A		mh_MhA1_Contig219							1	1
OG0003144	A	meloidogyne_hapla.PRJNA29083.WBPS14	transcript:MhA1_Contig630.frz3.gene2	mh_1A		mh_1A	A		mh_MhA1_Contig221						1		1
OG0003145	A	meloidogyne_hapla.PRJNA29083.WBPS14	transcript:MhA1_Contig194.frz3.gene10	mh_MhA1_Contig194		mh_MhA1_Contig194	A		mh_MhA1_Contig2221		1						1
OG0003152	N	meloidogyne_hapla.PRJNA29083.WBPS14	transcript:MhA1_Contig88.frz3.gene103	mh_11		mh_11	N		mh_MhA1_Contig2222	1							1
OG0003159	N	meloidogyne_hapla.PRJNA29083.WBPS14	transcript:MhA1_Contig334.frz3.gene16	mh_7		mh_7	N		mh_MhA1_Contig2229							1	1
OG0003177	N	meloidogyne_hapla.PRJNA29083.WBPS14	transcript:MhA1_Contig565.frz3.gene13	mh_14		mh_14	N		mh_MhA1_Contig2250	1							1
OG0003178	C	meloidogyne_hapla.PRJNA29083.WBPS14	transcript:MhA1_Contig147.frz3.gene88	mh_6		mh_6	C		mh_MhA1_Contig2268		1						1
OG0003182	C	meloidogyne_hapla.PRJNA29083.WBPS14	transcript:MhA1_Contig915.frz3.gene13	mh_4		mh_4	C		mh_MhA1_Contig2276	1							1
OG0003184	A	meloidogyne_hapla.PRJNA29083.WBPS14	transcript:MhA1_Contig177.frz3.gene9	mh_11		mh_11	A		mh_MhA1_Contig2279		1						1
OG0003185	A	meloidogyne_hapla.PRJNA29083.WBPS14	transcript:MhA1_Contig56.frz3.gene3	mh_1B		mh_1B	A		mh_MhA1_Contig2298	1							1
OG0003188	X	meloidogyne_hapla.PRJNA29083.WBPS14	transcript:MhA1_Contig2630.frz3.gene1	mh_MhA1_Contig2630		mh_MhA1_Contig2630	X		mh_MhA1_Contig2307		1						1
OG0003189	X	meloidogyne_hapla.PRJNA29083.WBPS14	transcript:MhA1_Contig1063.frz3.gene6	mh_6		mh_6	X		mh_MhA1_Contig2321		1						1
OG0003192	X	meloidogyne_hapla.PRJNA29083.WBPS14	transcript:MhA1_Contig79.frz3.fgene1	mh_5		mh_5	X		mh_MhA1_Contig2322		1						1
OG0003194	X	meloidogyne_hapla.PRJNA29083.WBPS14	transcript:MhA1_Contig1394.frz3.gene1	mh_MhA1_Contig1394		mh_MhA1_Contig1394	X		mh_MhA1_Contig233	1							1
OG0003197	X	meloidogyne_hapla.PRJNA29083.WBPS14	transcript:MhA1_Contig649.frz3.gene2	mh_8		mh_8	X		mh_MhA1_Contig2334		1						1
OG0003198	X	meloidogyne_hapla.PRJNA29083.WBPS14	transcript:MhA1_Contig335.frz3.fgene3	mh_7		mh_7	X		mh_MhA1_Contig2356			1					1
OG0003200	X	meloidogyne_hapla.PRJNA29083.WBPS14	transcript:MhA1_Contig2064.frz3.gene1	mh_MhA1_Contig2064		mh_MhA1_Contig2064	X		mh_MhA1_Contig2359					1			1
OG0003211	D	meloidogyne_hapla.PRJNA29083.WBPS14	transcript:MhA1_Contig1371.frz3.gene8	mh_2A		mh_2A	D		mh_MhA1_Contig2377						1		1
OG0003212	D	meloidogyne_hapla.PRJNA29083.WBPS14	transcript:MhA1_Contig1371.frz3.gene10	mh_2A		mh_2A	D		mh_MhA1_Contig2401			2					2
OG0003220	D	meloidogyne_hapla.PRJNA29083.WBPS14	transcript:MhA1_Contig83.frz3.gene9	mh_5		mh_5	D		mh_MhA1_Contig2419		1						1
OG0003223	D	meloidogyne_hapla.PRJNA29083.WBPS14	transcript:MhA1_Contig1305.frz3.gene10	mh_1A		mh_1A	D		mh_MhA1_Contig242				1				1
OG0003224	D	meloidogyne_hapla.PRJNA29083.WBPS14	transcript:MhA1_Contig107.frz3.gene14	mh_13B		mh_13B	D		mh_MhA1_Contig2440	1							1
OG0003226	D	meloidogyne_hapla.PRJNA29083.WBPS14	transcript:MhA1_Contig883.frz3.gene6	mh_2A		mh_2A	D		mh_MhA1_Contig2442	2							2
OG0003231	D	meloidogyne_hapla.PRJNA29083.WBPS14	transcript:MhA1_Contig1095.frz3.gene4	mh_5		mh_5	D		mh_MhA1_Contig2458		2						2
OG0003233	D	meloidogyne_hapla.PRJNA29083.WBPS14	transcript:MhA1_Contig255.frz3.gene28	mh_13A.17		mh_13A.17	D		mh_MhA1_Contig2471	1							1
OG0003235	D	meloidogyne_hapla.PRJNA29083.WBPS14	transcript:MhA1_Contig1440.frz3.gene3	mh_1B		mh_1B	D		mh_MhA1_Contig2493			1					1
OG0003243	D	meloidogyne_hapla.PRJNA29083.WBPS14	transcript:MhA1_Contig53.frz3.gene21	mh_1B		mh_1B	D		mh_MhA1_Contig2508					1			1
OG0003244	D	meloidogyne_hapla.PRJNA29083.WBPS14	transcript:MhA1_Contig702.frz3.gene4	mh_MhA1_Contig702		mh_MhA1_Contig702	D		mh_MhA1_Contig2512			1					1
OG0003262	D	meloidogyne_hapla.PRJNA29083.WBPS14	transcript:MhA1_Contig624.frz3.fgene3	mh_5		mh_5	D		mh_MhA1_Contig2545				1				1
OG0003274	D	meloidogyne_hapla.PRJNA29083.WBPS14	transcript:MhA1_Contig1192.frz3.fgene4	mh_7		mh_7	D		mh_MhA1_Contig262	2				1			3
OG0003277	D	meloidogyne_hapla.PRJNA29083.WBPS14	transcript:MhA1_Contig2367.frz3.fgene2	mh_7		mh_7	D		mh_MhA1_Contig2630							1	1
OG0003281	D	meloidogyne_hapla.PRJNA29083.WBPS14	transcript:MhA1_Contig107.frz3.gene40	mh_13B		mh_13B	D		mh_MhA1_Contig2660				1				1
OG0003282	D	meloidogyne_hapla.PRJNA29083.WBPS14	transcript:MhA1_Contig108.frz3.fgene3	mh_13B		mh_13B	D		mh_MhA1_Contig2678					1			1
OG0003286	D	meloidogyne_hapla.PRJNA29083.WBPS14	transcript:MhA1_Contig1602.frz3.gene9	mh_2A		mh_2A	D		mh_MhA1_Contig2687	1							1
OG0003288	D	meloidogyne_hapla.PRJNA29083.WBPS14	transcript:MhA1_Contig1352.frz3.fgene1	mh_MhA1_Contig1352		mh_MhA1_Contig1352	D		mh_MhA1_Contig2705			1					1
OG0003297	B	meloidogyne_hapla.PRJNA29083.WBPS14	transcript:MhA1_Contig1246.frz3.gene16	mh_5		mh_5	B		mh_MhA1_Contig2784				1				1
OG0003298	B	meloidogyne_hapla.PRJNA29083.WBPS14	transcript:MhA1_Contig877.frz3.gene26	mh_5		mh_5	B		mh_MhA1_Contig2786			1					1
OG0003310	B	meloidogyne_hapla.PRJNA29083.WBPS14	transcript:MhA1_Contig413.frz3.fgene1	mh_2B		mh_2B	B		mh_MhA1_Contig2821					1			1
OG0003311	B	meloidogyne_hapla.PRJNA29083.WBPS14	transcript:MhA1_Contig2419.frz3.fgene2	mh_MhA1_Contig2419		mh_MhA1_Contig2419	B		mh_MhA1_Contig2825			1					1
OG0003312	B	meloidogyne_hapla.PRJNA29083.WBPS14	transcript:MhA1_Contig953.frz3.gene4	mh_7		mh_7	B		mh_MhA1_Contig2854				1				1
OG0003313	B	meloidogyne_hapla.PRJNA29083.WBPS14	transcript:MhA1_Contig1118.frz3.gene2	mh_1A		mh_1A	B		mh_MhA1_Contig2856							1	1
OG0003322	B	meloidogyne_hapla.PRJNA29083.WBPS14	transcript:MhA1_Contig684.frz3.gene5	mh_10.12.18		mh_10.12.18	B		mh_MhA1_Contig2870		1						1
OG0003328	B	meloidogyne_hapla.PRJNA29083.WBPS14	transcript:MhA1_Contig2278.frz3.gene2	mh_5		mh_5	B		mh_MhA1_Contig289	1							1
OG0003331	B	meloidogyne_hapla.PRJNA29083.WBPS14	transcript:MhA1_Contig648.frz3.gene4	mh_1A		mh_1A	B		mh_MhA1_Contig2890		1						1
OG0003339	B	meloidogyne_hapla.PRJNA29083.WBPS14	transcript:MhA1_Contig1777.frz3.fgene3	mh_MhA1_Contig1777		mh_MhA1_Contig1777	B		mh_MhA1_Contig2922		1						1
OG0003348	B	meloidogyne_hapla.PRJNA29083.WBPS14	transcript:MhA1_Contig812.frz3.gene17	mh_MhA1_Contig812		mh_MhA1_Contig812	B		mh_MhA1_Contig2925				1				1
OG0003353	B	meloidogyne_hapla.PRJNA29083.WBPS14	transcript:MhA1_Contig874.frz3.gene1	mh_7		mh_7	B		mh_MhA1_Contig293							1	1
OG0003361	B	meloidogyne_hapla.PRJNA29083.WBPS14	transcript:MhA1_Contig50.frz3.gene17	mh_1B		mh_1B	B		mh_MhA1_Contig2970	1		1					2
OG0003364	B	meloidogyne_hapla.PRJNA29083.WBPS14	transcript:MhA1_Contig1005.frz3.gene6	mh_7		mh_7	B		mh_MhA1_Contig3008						1		1
OG0003368	B	meloidogyne_hapla.PRJNA29083.WBPS14	transcript:MhA1_Contig1571.frz3.gene7	mh_10.12.18		mh_10.12.18	B		mh_MhA1_Contig3017	1							1
OG0003373	B	meloidogyne_hapla.PRJNA29083.WBPS14	transcript:MhA1_Contig829.frz3.gene13	mh_10.12.18		mh_10.12.18	B		mh_MhA1_Contig3042					1			1
OG0003375	B	meloidogyne_hapla.PRJNA29083.WBPS14	transcript:MhA1_Contig342.frz3.gene25	mh_3		mh_3	B		mh_MhA1_Contig310	2				1		1	4
OG0003377	B	meloidogyne_hapla.PRJNA29083.WBPS14	transcript:MhA1_Contig487.frz3.gene8	mh_1A		mh_1A	B		mh_MhA1_Contig315		1						1
OG0003394	A	meloidogyne_hapla.PRJNA29083.WBPS14	transcript:MhA1_Contig53.frz3.fgene2	mh_1B		mh_1B	A		mh_MhA1_Contig32	1							1
OG0003488	E	meloidogyne_hapla.PRJNA29083.WBPS14	transcript:MhA1_Contig2062.frz3.gene3	mh_MhA1_Contig2062		mh_MhA1_Contig2062	E		mh_MhA1_Contig3242			1					1
OG0003489	E	meloidogyne_hapla.PRJNA29083.WBPS14	transcript:MhA1_Contig1067.frz3.gene5	mh_MhA1_Contig1067		mh_MhA1_Contig1067	E		mh_MhA1_Contig325			2					2
OG0003490	E	meloidogyne_hapla.PRJNA29083.WBPS14	transcript:MhA1_Contig2021.frz3.fgene1	mh_16		mh_16	E		mh_MhA1_Contig3307			1					1
OG0003493	E	meloidogyne_hapla.PRJNA29083.WBPS14	transcript:MhA1_Contig309.20	mh_16		mh_16	E		mh_MhA1_Contig336	1							1
OG0003495	E	meloidogyne_hapla.PRJNA29083.WBPS14	transcript:MhA1_Contig2204.frz3.fgene1	mh_7		mh_7	E		mh_MhA1_Contig3364			1					1
OG0003496	E	meloidogyne_hapla.PRJNA29083.WBPS14	transcript:MhA1_Contig288.frz3.gene25	mh_5		mh_5	E		mh_MhA1_Contig34			1				1	2
OG0003497	E	meloidogyne_hapla.PRJNA29083.WBPS14	transcript:MhA1_Contig1493.frz3.gene16	mh_16		mh_16	E		mh_MhA1_Contig363						1		1
OG0003499	E	meloidogyne_hapla.PRJNA29083.WBPS14	transcript:MhA1_Contig183.frz3.gene3	mh_MhA1_Contig183		mh_MhA1_Contig183	E		mh_MhA1_Contig367							1	1
OG0003502	E	meloidogyne_hapla.PRJNA29083.WBPS14	transcript:MhA1_Contig952.frz3.gene13	mh_16		mh_16	E		mh_MhA1_Contig368				1				1
OG0003503	E	meloidogyne_hapla.PRJNA29083.WBPS14	transcript:MhA1_Contig952.frz3.gene14	mh_16		mh_16	E		mh_MhA1_Contig381		1						1
OG0003505	E	meloidogyne_hapla.PRJNA29083.WBPS14	transcript:MhA1_Contig342.frz3.gene30	mh_3		mh_3	E		mh_MhA1_Contig386		1						1
OG0003507	E	meloidogyne_hapla.PRJNA29083.WBPS14	transcript:MhA1_Contig90.frz3.fgene1	mh_13A.17		mh_13A.17	E		mh_MhA1_Contig394					1			1
OG0003511	E	meloidogyne_hapla.PRJNA29083.WBPS14	transcript:MhA1_Contig213.frz3.gene67	mh_MhA1_Contig213		mh_MhA1_Contig213	E		mh_MhA1_Contig398					1			1
OG0003513	E	meloidogyne_hapla.PRJNA29083.WBPS14	transcript:MhA1_Contig990.frz3.gene10	mh_1A		mh_1A	E		mh_MhA1_Contig408		1	1					2
OG0003520	E	meloidogyne_hapla.PRJNA29083.WBPS14	transcript:MhA1_Contig290.frz3.gene15	mh_13A.17		mh_13A.17	E		mh_MhA1_Contig409		1						1
OG0003521	E	meloidogyne_hapla.PRJNA29083.WBPS14	transcript:MhA1_Contig874.frz3.gene12	mh_7		mh_7	E		mh_MhA1_Contig437	3					1		4
OG0003522	E	meloidogyne_hapla.PRJNA29083.WBPS14	transcript:MhA1_Contig1723.frz3.fgene2	mh_16		mh_16	E		mh_MhA1_Contig44			2					2
OG0003527	E	meloidogyne_hapla.PRJNA29083.WBPS14	transcript:MhA1_Contig468.frz3.gene34	mh_13A.17		mh_13A.17	E		mh_MhA1_Contig454					1			1
OG0003528	E	meloidogyne_hapla.PRJNA29083.WBPS14	transcript:MhA1_Contig1493.frz3.gene15	mh_16		mh_16	E		mh_MhA1_Contig460	2							2
OG0003530	E	meloidogyne_hapla.PRJNA29083.WBPS14	transcript:MhA1_Contig933.frz3.gene3	mh_16		mh_16	E		mh_MhA1_Contig47			1					1
OG0003532	E	meloidogyne_hapla.PRJNA29083.WBPS14	transcript:MhA1_Contig349.frz3.gene11	mh_16		mh_16	E		mh_MhA1_Contig470	3							3
OG0003534	E	meloidogyne_hapla.PRJNA29083.WBPS14	transcript:MhA1_Contig118.frz3.gene17	mh_16		mh_16	E		mh_MhA1_Contig472	1							1
OG0003539	E	meloidogyne_hapla.PRJNA29083.WBPS14	transcript:MhA1_Contig1303.frz3.fgene1	mh_MhA1_Contig1303		mh_MhA1_Contig1303	E		mh_MhA1_Contig506				1				1
OG0003540	E	meloidogyne_hapla.PRJNA29083.WBPS14	transcript:MhA1_Contig1126.frz3.gene7	mh_2A		mh_2A	E		mh_MhA1_Contig511			1					1
OG0003542	E	meloidogyne_hapla.PRJNA29083.WBPS14	transcript:MhA1_Contig309.frz3.gene4	mh_16		mh_16	E		mh_MhA1_Contig544			1					1
OG0003544	E	meloidogyne_hapla.PRJNA29083.WBPS14	transcript:MhA1_Contig912.frz3.gene9	mh_16		mh_16	E		mh_MhA1_Contig55	1	1	1			1		4
OG0003547	E	meloidogyne_hapla.PRJNA29083.WBPS14	transcript:MhA1_Contig933.frz3.gene2	mh_16		mh_16	E		mh_MhA1_Contig572							1	1
OG0003552	E	meloidogyne_hapla.PRJNA29083.WBPS14	transcript:MhA1_Contig123.frz3.gene113	mh_13A.17		mh_13A.17	E		mh_MhA1_Contig576							2	2
OG0003554	E	meloidogyne_hapla.PRJNA29083.WBPS14	transcript:MhA1_Contig1695.frz3.gene11	mh_3		mh_3	E		mh_MhA1_Contig580	2			1	1			4
OG0003555	E	meloidogyne_hapla.PRJNA29083.WBPS14	transcript:MhA1_Contig309.frz3.gene13	mh_16		mh_16	E		mh_MhA1_Contig594	2							2
OG0003556	E	meloidogyne_hapla.PRJNA29083.WBPS14	transcript:MhA1_Contig1128.frz3.fgene2	mh_3		mh_3	E		mh_MhA1_Contig596	5		1					6
OG0003559	E	meloidogyne_hapla.PRJNA29083.WBPS14	transcript:MhA1_Contig684.frz3.fgene3	mh_10.12.18		mh_10.12.18	E		mh_MhA1_Contig604					1			1
OG0003561	E	meloidogyne_hapla.PRJNA29083.WBPS14	transcript:MhA1_Contig1271.frz3.gene13	mh_MhA1_Contig1271		mh_MhA1_Contig1271	E		mh_MhA1_Contig623				1				1
OG0003562	E	meloidogyne_hapla.PRJNA29083.WBPS14	transcript:MhA1_Contig349.frz3.gene36	mh_16		mh_16	E		mh_MhA1_Contig64				1				1
OG0003563	E	meloidogyne_hapla.PRJNA29083.WBPS14	transcript:MhA1_Contig958.frz3.fgene3	mh_7		mh_7	E		mh_MhA1_Contig641				2				2
OG0003564	E	meloidogyne_hapla.PRJNA29083.WBPS14	transcript:MhA1_Contig1178.frz3.gene5	mh_2A		mh_2A	E		mh_MhA1_Contig643				2				2
OG0003570	E	meloidogyne_hapla.PRJNA29083.WBPS14	transcript:MhA1_Contig118.frz3.gene24	mh_16		mh_16	E		mh_MhA1_Contig645				2				2
OG0003574	E	meloidogyne_hapla.PRJNA29083.WBPS14	transcript:MhA1_Contig611.frz3.gene10	mh_16		mh_16	E		mh_MhA1_Contig651							1	1
OG0003575	E	meloidogyne_hapla.PRJNA29083.WBPS14	transcript:MhA1_Contig912.frz3.gene5	mh_16		mh_16	E		mh_MhA1_Contig655	1							1
OG0003576	E	meloidogyne_hapla.PRJNA29083.WBPS14	transcript:MhA1_Contig118.frz3.gene35	mh_16		mh_16	E		mh_MhA1_Contig658	3							3
OG0003579	E	meloidogyne_hapla.PRJNA29083.WBPS14	transcript:MhA1_Contig579.frz3.gene11	mh_13A.17		mh_13A.17	E		mh_MhA1_Contig660			3					3
OG0003580	E	meloidogyne_hapla.PRJNA29083.WBPS14	transcript:MhA1_Contig199.frz3.fgene1	mh_21		mh_21	E		mh_MhA1_Contig665				1				1
OG0003582	E	meloidogyne_hapla.PRJNA29083.WBPS14	transcript:MhA1_Contig580.frz3.gene6	mh_MhA1_Contig580		mh_MhA1_Contig580	E		mh_MhA1_Contig676			1					1
OG0003583	E	meloidogyne_hapla.PRJNA29083.WBPS14	transcript:MhA1_Contig933.frz3.gene5	mh_16		mh_16	E		mh_MhA1_Contig677	1							1
OG0003584	E	meloidogyne_hapla.PRJNA29083.WBPS14	transcript:MhA1_Contig78.frz3.fgene2	mh_5		mh_5	E		mh_MhA1_Contig691						1		1
OG0003586	E	meloidogyne_hapla.PRJNA29083.WBPS14	transcript:MhA1_Contig1499.frz3.gene2	mh_MhA1_Contig1499		mh_MhA1_Contig1499	E		mh_MhA1_Contig693	2							2
OG0003594	E	meloidogyne_hapla.PRJNA29083.WBPS14	transcript:MhA1_Contig118.frz3.gene92	mh_16		mh_16	E		mh_MhA1_Contig695	3					1		4
OG0003601	N	meloidogyne_hapla.PRJNA29083.WBPS14	transcript:MhA1_Contig239.frz3.gene38	mh_11		mh_11	N		mh_MhA1_Contig696	1							1
OG0003612	N	meloidogyne_hapla.PRJNA29083.WBPS14	transcript:MhA1_Contig403.frz3.gene2	mh_20		mh_20	N		mh_MhA1_Contig702				1				1
OG0003614	N	meloidogyne_hapla.PRJNA29083.WBPS14	transcript:MhA1_Contig2043.frz3.fgene1	mh_MhA1_Contig2043		mh_MhA1_Contig2043	N		mh_MhA1_Contig704			1					1
OG0003615	N	meloidogyne_hapla.PRJNA29083.WBPS14	transcript:MhA1_Contig239.frz3.gene39	mh_11		mh_11	N		mh_MhA1_Contig707			7					7
OG0003617	N	meloidogyne_hapla.PRJNA29083.WBPS14	transcript:MhA1_Contig437.frz3.gene10	mh_MhA1_Contig437		mh_MhA1_Contig437	N		mh_MhA1_Contig713						1		1
OG0003626	N	meloidogyne_hapla.PRJNA29083.WBPS14	transcript:MhA1_Contig1494.frz3.gene4	mh_11		mh_11	N		mh_MhA1_Contig725			1					1
OG0003627	N	meloidogyne_hapla.PRJNA29083.WBPS14	transcript:MhA1_Contig726.frz3.gene15	mh_MhA1_Contig726		mh_MhA1_Contig726	N		mh_MhA1_Contig726				1		1	1	3
OG0003628	C	meloidogyne_hapla.PRJNA29083.WBPS14	transcript:MhA1_Contig147.frz3.gene95	mh_6		mh_6	C		mh_MhA1_Contig729		2						2
OG0003630	C	meloidogyne_hapla.PRJNA29083.WBPS14	transcript:MhA1_Contig113.frz3.gene36	mh_4		mh_4	C		mh_MhA1_Contig769				1				1
OG0003631	C	meloidogyne_hapla.PRJNA29083.WBPS14	transcript:MhA1_Contig55.frz3.fgene1	mh_MhA1_Contig55		mh_MhA1_Contig55	C		mh_MhA1_Contig772		1			1			2
OG0003633	C	meloidogyne_hapla.PRJNA29083.WBPS14	transcript:MhA1_Contig707.frz3.gene14	mh_MhA1_Contig707		mh_MhA1_Contig707	C		mh_MhA1_Contig786	2							2
OG0003636	C	meloidogyne_hapla.PRJNA29083.WBPS14	transcript:MhA1_Contig2155.frz3.fgene1	mh_2B		mh_2B	C		mh_MhA1_Contig788	2							2
OG0003637	C	meloidogyne_hapla.PRJNA29083.WBPS14	transcript:MhA1_Contig213.frz3.gene43	mh_MhA1_Contig213		mh_MhA1_Contig213	C		mh_MhA1_Contig795	2			1				3
OG0003639	C	meloidogyne_hapla.PRJNA29083.WBPS14	transcript:MhA1_Contig147.frz3.gene102	mh_6		mh_6	C		mh_MhA1_Contig808				1				1
OG0003640	C	meloidogyne_hapla.PRJNA29083.WBPS14	transcript:MhA1_Contig121.frz3.fgene3	mh_11		mh_11	C		mh_MhA1_Contig81				1		1		2
OG0003641	C	meloidogyne_hapla.PRJNA29083.WBPS14	transcript:MhA1_Contig389.frz3.gene4	mh_4		mh_4	C		mh_MhA1_Contig812		1	1	1				3
OG0003643	C	meloidogyne_hapla.PRJNA29083.WBPS14	transcript:MhA1_Contig1595.frz3.gene2	mh_4		mh_4	C		mh_MhA1_Contig817						1		1
OG0003645	C	meloidogyne_hapla.PRJNA29083.WBPS14	transcript:MhA1_Contig818.frz3.fgene1	mh_7		mh_7	C		mh_MhA1_Contig822						2		2
OG0003649	C	meloidogyne_hapla.PRJNA29083.WBPS14	transcript:MhA1_Contig134.frz3.gene29	mh_6		mh_6	C		mh_MhA1_Contig832			1					1
OG0003650	C	meloidogyne_hapla.PRJNA29083.WBPS14	transcript:MhA1_Contig134.frz3.gene34	mh_6		mh_6	C		mh_MhA1_Contig850	1							1
OG0003651	C	meloidogyne_hapla.PRJNA29083.WBPS14	transcript:MhA1_Contig147.frz3.gene97	mh_6		mh_6	C		mh_MhA1_Contig855	1						1	2
OG0003652	C	meloidogyne_hapla.PRJNA29083.WBPS14	transcript:MhA1_Contig389.frz3.gene8	mh_4		mh_4	C		mh_MhA1_Contig86			1					1
OG0003653	C	meloidogyne_hapla.PRJNA29083.WBPS14	transcript:MhA1_Contig2079.frz3.gene2	mh_2A		mh_2A	C		mh_MhA1_Contig862							1	1
OG0003656	C	meloidogyne_hapla.PRJNA29083.WBPS14	transcript:MhA1_Contig468.frz3.gene8	mh_13A.17		mh_13A.17	C		mh_MhA1_Contig882				1				1
OG0003658	C	meloidogyne_hapla.PRJNA29083.WBPS14	transcript:MhA1_Contig1403.frz3.fgene1	mh_5		mh_5	C		mh_MhA1_Contig885	1							1
OG0003662	N	meloidogyne_hapla.PRJNA29083.WBPS14	transcript:MhA1_Contig213.frz3.fgene6	mh_MhA1_Contig213		mh_MhA1_Contig213	N		mh_MhA1_Contig892		1						1
OG0003664	N	meloidogyne_hapla.PRJNA29083.WBPS14	transcript:MhA1_Contig30.frz3.gene20	mh_1B		mh_1B	N		mh_MhA1_Contig896	1							1
OG0003665	N	meloidogyne_hapla.PRJNA29083.WBPS14	transcript:MhA1_Contig1192.frz3.fgene1	mh_7		mh_7	N		mh_MhA1_Contig899		1						1
OG0003667	C	meloidogyne_hapla.PRJNA29083.WBPS14	transcript:MhA1_Contig342.frz3.gene19	mh_3		mh_3	C		mh_MhA1_Contig905		1						1
OG0003670	C	meloidogyne_hapla.PRJNA29083.WBPS14	transcript:MhA1_Contig1576.frz3.gene6	mh_11		mh_11	C		mh_MhA1_Contig913					1			1
OG0003674	C	meloidogyne_hapla.PRJNA29083.WBPS14	transcript:MhA1_Contig147.frz3.gene55	mh_6		mh_6	C		mh_MhA1_Contig931	2							2
OG0003677	C	meloidogyne_hapla.PRJNA29083.WBPS14	transcript:MhA1_Contig388.frz3.gene12	mh_4		mh_4	C		mh_MhA1_Contig932	3							3
OG0003679	C	meloidogyne_hapla.PRJNA29083.WBPS14	transcript:MhA1_Contig42.frz3.gene29	mh_4		mh_4	C		mh_MhA1_Contig944					1			1
OG0003683	N	meloidogyne_hapla.PRJNA29083.WBPS14	transcript:MhA1_Contig199.frz3.gene28	mh_21		mh_21	N		mh_MhA1_Contig977							1	1
OG0003686	C	meloidogyne_hapla.PRJNA29083.WBPS14	transcript:MhA1_Contig113.frz3.gene44	mh_4		mh_4	C		mh_MhA1_Contig989				1				1
OG0003687	C	meloidogyne_hapla.PRJNA29083.WBPS14	transcript:MhA1_Contig541.frz3.gene15	mh_4		mh_4	C		mh_MhA1_Contig992	2							2
OG0003688	C	meloidogyne_hapla.PRJNA29083.WBPS14	transcript:MhA1_Contig1905.frz3.fgene1	mh_2B		mh_2B	C		mh_MhA1_Contig994			1				1	2
OG0003689	C	meloidogyne_hapla.PRJNA29083.WBPS14	transcript:MhA1_Contig1366.frz3.gene1	mh_MhA1_Contig1366		mh_MhA1_Contig1366	C		Grand Total	429	257	419	210	170	122	81	1688
OG0003690	C	meloidogyne_hapla.PRJNA29083.WBPS14	transcript:MhA1_Contig104.frz3.gene16	mh_3		mh_3	C
OG0003692	C	meloidogyne_hapla.PRJNA29083.WBPS14	transcript:MhA1_Contig138.frz3.gene7	mh_3		mh_3	C
OG0003695	C	meloidogyne_hapla.PRJNA29083.WBPS14	transcript:MhA1_Contig138.frz3.gene43	mh_3		mh_3	C
OG0003696	C	meloidogyne_hapla.PRJNA29083.WBPS14	transcript:MhA1_Contig705.frz3.gene3	mh_4		mh_4	C
OG0003699	N	meloidogyne_hapla.PRJNA29083.WBPS14	transcript:MhA1_Contig1.frz3.gene5	mh_MhA1_Contig1		mh_MhA1_Contig1	N
OG0003706	N	meloidogyne_hapla.PRJNA29083.WBPS14	transcript:MhA1_Contig271.frz3.gene53	mh_5		mh_5	N
OG0003707	N	meloidogyne_hapla.PRJNA29083.WBPS14	transcript:MhA1_Contig1721.frz3.gene1	mh_6		mh_6	N
OG0003715	N	meloidogyne_hapla.PRJNA29083.WBPS14	transcript:MhA1_Contig541.frz3.fgene1	mh_4		mh_4	N
OG0003718	N	meloidogyne_hapla.PRJNA29083.WBPS14	transcript:MhA1_Contig2150.frz3.gene5	mh_11		mh_11	N
OG0003720	C	meloidogyne_hapla.PRJNA29083.WBPS14	transcript:MhA1_Contig46.frz3.gene5	mh_4		mh_4	C
OG0003721	C	meloidogyne_hapla.PRJNA29083.WBPS14	transcript:MhA1_Contig3307.frz3.fgene1	mh_MhA1_Contig3307		mh_MhA1_Contig3307	C
OG0003722	C	meloidogyne_hapla.PRJNA29083.WBPS14	transcript:MhA1_Contig1451.frz3.gene14	mh_8		mh_8	C
OG0003723	C	meloidogyne_hapla.PRJNA29083.WBPS14	transcript:MhA1_Contig565.frz3.gene8	mh_14		mh_14	C
OG0003725	C	meloidogyne_hapla.PRJNA29083.WBPS14	transcript:MhA1_Contig130.frz3.gene21	mh_13A.17		mh_13A.17	C
OG0003727	C	meloidogyne_hapla.PRJNA29083.WBPS14	transcript:MhA1_Contig2078.frz3.fgene2	mh_3		mh_3	C
OG0003729	C	meloidogyne_hapla.PRJNA29083.WBPS14	transcript:MhA1_Contig1564.frz3.fgene1	mh_10.12.18		mh_10.12.18	C
OG0003730	C	meloidogyne_hapla.PRJNA29083.WBPS14	transcript:MhA1_Contig1375.frz3.gene5	mh_8		mh_8	C
OG0003731	C	meloidogyne_hapla.PRJNA29083.WBPS14	transcript:MhA1_Contig42.frz3.gene20	mh_4		mh_4	C
OG0003737	N	meloidogyne_hapla.PRJNA29083.WBPS14	transcript:MhA1_Contig252.frz3.gene8	mh_2B		mh_2B	N
OG0003739	C	meloidogyne_hapla.PRJNA29083.WBPS14	transcript:MhA1_Contig115.frz3.fgene2	mh_4		mh_4	C
OG0003740	C	meloidogyne_hapla.PRJNA29083.WBPS14	transcript:MhA1_Contig217.frz3.gene3	mh_MhA1_Contig217		mh_MhA1_Contig217	C
OG0003742	C	meloidogyne_hapla.PRJNA29083.WBPS14	transcript:MhA1_Contig42.frz3.fgene3	mh_4		mh_4	C
OG0003743	C	meloidogyne_hapla.PRJNA29083.WBPS14	transcript:MhA1_Contig137.frz3.gene9	mh_3		mh_3	C
OG0003744	C	meloidogyne_hapla.PRJNA29083.WBPS14	transcript:MhA1_Contig86.frz3.gene1	mh_MhA1_Contig86		mh_MhA1_Contig86	C
OG0003747	C	meloidogyne_hapla.PRJNA29083.WBPS14	transcript:MhA1_Contig117.frz3.fgene1	mh_4		mh_4	C
OG0003748	C	meloidogyne_hapla.PRJNA29083.WBPS14	transcript:MhA1_Contig765.frz3.gene9	mh_20		mh_20	C
OG0003751	C	meloidogyne_hapla.PRJNA29083.WBPS14	transcript:MhA1_Contig1137.frz3.fgene2	mh_MhA1_Contig1137		mh_MhA1_Contig1137	C
OG0003754	C	meloidogyne_hapla.PRJNA29083.WBPS14	transcript:MhA1_Contig168.frz3.gene54	mh_1A		mh_1A	C
OG0003756	C	meloidogyne_hapla.PRJNA29083.WBPS14	transcript:MhA1_Contig261.frz3.gene21	mh_2B		mh_2B	C
OG0003757	C	meloidogyne_hapla.PRJNA29083.WBPS14	transcript:MhA1_Contig914.frz3.gene9	mh_16		mh_16	C
OG0003758	C	meloidogyne_hapla.PRJNA29083.WBPS14	transcript:MhA1_Contig993.frz3.fgene1	mh_8		mh_8	C
OG0003760	C	meloidogyne_hapla.PRJNA29083.WBPS14	transcript:MhA1_Contig44.frz3.gene1	mh_MhA1_Contig44		mh_MhA1_Contig44	C
OG0003761	C	meloidogyne_hapla.PRJNA29083.WBPS14	transcript:MhA1_Contig1000.frz3.gene16	mh_2A		mh_2A	C
OG0003762	C	meloidogyne_hapla.PRJNA29083.WBPS14	transcript:MhA1_Contig1243.frz3.gene11	mh_8		mh_8	C
OG0003763	C	meloidogyne_hapla.PRJNA29083.WBPS14	transcript:MhA1_Contig1529.frz3.gene7	mh_MhA1_Contig1529		mh_MhA1_Contig1529	C
OG0003765	C	meloidogyne_hapla.PRJNA29083.WBPS14	transcript:MhA1_Contig994.frz3.gene1	mh_MhA1_Contig994		mh_MhA1_Contig994	C
OG0003766	C	meloidogyne_hapla.PRJNA29083.WBPS14	transcript:MhA1_Contig707.frz3.gene17	mh_MhA1_Contig707		mh_MhA1_Contig707	C
OG0003767	A	meloidogyne_hapla.PRJNA29083.WBPS14	transcript:MhA1_Contig1806.frz3.gene5	mh_3		mh_3	A
OG0003768	A	meloidogyne_hapla.PRJNA29083.WBPS14	transcript:MhA1_Contig579.frz3.gene26	mh_13A.17		mh_13A.17	A
OG0003769	A	meloidogyne_hapla.PRJNA29083.WBPS14	transcript:MhA1_Contig696.frz3.fgene1	mh_MhA1_Contig696		mh_MhA1_Contig696	A
OG0003770	A	meloidogyne_hapla.PRJNA29083.WBPS14	transcript:MhA1_Contig456.frz3.gene6	mh_4		mh_4	A
OG0003772	A	meloidogyne_hapla.PRJNA29083.WBPS14	transcript:MhA1_Contig55.frz3.gene24	mh_MhA1_Contig55		mh_MhA1_Contig55	A
OG0003773	A	meloidogyne_hapla.PRJNA29083.WBPS14	transcript:MhA1_Contig208.frz3.fgene3	mh_21		mh_21	A
OG0003774	A	meloidogyne_hapla.PRJNA29083.WBPS14	transcript:MhA1_Contig456.frz3.gene17	mh_4		mh_4	A
OG0003776	A	meloidogyne_hapla.PRJNA29083.WBPS14	transcript:MhA1_Contig1077.frz3.gene8	mh_1B		mh_1B	A
OG0003777	A	meloidogyne_hapla.PRJNA29083.WBPS14	transcript:MhA1_Contig91.frz3.gene6	mh_13A.17		mh_13A.17	A
OG0003778	A	meloidogyne_hapla.PRJNA29083.WBPS14	transcript:MhA1_Contig1133.frz3.gene5	mh_10.12.18		mh_10.12.18	A
OG0003780	A	meloidogyne_hapla.PRJNA29083.WBPS14	transcript:MhA1_Contig353.frz3.gene6	mh_13B		mh_13B	A
OG0003781	A	meloidogyne_hapla.PRJNA29083.WBPS14	transcript:MhA1_Contig779.frz3.gene1	mh_13A.17		mh_13A.17	A
OG0003782	A	meloidogyne_hapla.PRJNA29083.WBPS14	transcript:MhA1_Contig1322.frz3.gene22	mh_2B		mh_2B	A
OG0003788	A	meloidogyne_hapla.PRJNA29083.WBPS14	transcript:MhA1_Contig992.frz3.gene3	mh_MhA1_Contig992		mh_MhA1_Contig992	A
OG0003793	A	meloidogyne_hapla.PRJNA29083.WBPS14	transcript:MhA1_Contig74.frz3.gene15	mh_1B		mh_1B	A
OG0003796	A	meloidogyne_hapla.PRJNA29083.WBPS14	transcript:MhA1_Contig761.frz3.gene5	mh_7		mh_7	A
OG0003799	A	meloidogyne_hapla.PRJNA29083.WBPS14	transcript:MhA1_Contig1178.frz3.gene1	mh_2A		mh_2A	A
OG0003800	A	meloidogyne_hapla.PRJNA29083.WBPS14	transcript:MhA1_Contig1075.frz3.gene3	mh_MhA1_Contig1075		mh_MhA1_Contig1075	A
OG0003801	A	meloidogyne_hapla.PRJNA29083.WBPS14	transcript:MhA1_Contig599.frz3.gene3	mh_13A.17		mh_13A.17	A
OG0003805	A	meloidogyne_hapla.PRJNA29083.WBPS14	transcript:MhA1_Contig155.frz3.gene15	mh_21		mh_21	A
OG0003810	A	meloidogyne_hapla.PRJNA29083.WBPS14	transcript:MhA1_Contig718.frz3.gene5	mh_1A		mh_1A	A
OG0003813	A	meloidogyne_hapla.PRJNA29083.WBPS14	transcript:MhA1_Contig492.frz3.fgene1	mh_4		mh_4	A
OG0003814	A	meloidogyne_hapla.PRJNA29083.WBPS14	transcript:MhA1_Contig1191.frz3.gene6	mh_7		mh_7	A
OG0003815	A	meloidogyne_hapla.PRJNA29083.WBPS14	transcript:MhA1_Contig953.frz3.gene18	mh_7		mh_7	A
OG0003816	A	meloidogyne_hapla.PRJNA29083.WBPS14	transcript:MhA1_Contig484.frz3.gene46	mh_1A		mh_1A	A
OG0003817	A	meloidogyne_hapla.PRJNA29083.WBPS14	transcript:MhA1_Contig1960.frz3.fgene2	mh_MhA1_Contig1960		mh_MhA1_Contig1960	A
OG0003818	A	meloidogyne_hapla.PRJNA29083.WBPS14	transcript:MhA1_Contig455.frz3.gene1	mh_4		mh_4	A
OG0003820	A	meloidogyne_hapla.PRJNA29083.WBPS14	transcript:MhA1_Contig30.frz3.gene22	mh_1B		mh_1B	A
OG0003821	A	meloidogyne_hapla.PRJNA29083.WBPS14	transcript:MhA1_Contig2471.frz3.gene6	mh_MhA1_Contig2471		mh_MhA1_Contig2471	A
OG0003823	A	meloidogyne_hapla.PRJNA29083.WBPS14	transcript:MhA1_Contig2785.frz3.fgene1	mh_4		mh_4	A
OG0003824	A	meloidogyne_hapla.PRJNA29083.WBPS14	transcript:MhA1_Contig1070.frz3.gene9	mh_1A		mh_1A	A
OG0003826	A	meloidogyne_hapla.PRJNA29083.WBPS14	transcript:MhA1_Contig334.frz3.gene28	mh_7		mh_7	A
OG0003829	A	meloidogyne_hapla.PRJNA29083.WBPS14	transcript:MhA1_Contig931.frz3.gene4	mh_MhA1_Contig931		mh_MhA1_Contig931	A
OG0003832	A	meloidogyne_hapla.PRJNA29083.WBPS14	transcript:MhA1_Contig1732.frz3.gene14	mh_1A		mh_1A	A
OG0003835	A	meloidogyne_hapla.PRJNA29083.WBPS14	transcript:MhA1_Contig1077.frz3.gene12	mh_1B		mh_1B	A
OG0003838	A	meloidogyne_hapla.PRJNA29083.WBPS14	transcript:MhA1_Contig599.frz3.fgene1	mh_13A.17		mh_13A.17	A
OG0003842	A	meloidogyne_hapla.PRJNA29083.WBPS14	transcript:MhA1_Contig2102.frz3.gene3	mh_13A.17		mh_13A.17	A
OG0003843	A	meloidogyne_hapla.PRJNA29083.WBPS14	transcript:MhA1_Contig130.frz3.gene3	mh_13A.17		mh_13A.17	A
OG0003844	A	meloidogyne_hapla.PRJNA29083.WBPS14	transcript:MhA1_Contig472.frz3.gene3	mh_MhA1_Contig472		mh_MhA1_Contig472	A
OG0003845	A	meloidogyne_hapla.PRJNA29083.WBPS14	transcript:MhA1_Contig31.frz3.fgene3	mh_1B		mh_1B	A
OG0003850	A	meloidogyne_hapla.PRJNA29083.WBPS14	transcript:MhA1_Contig2034.frz3.gene6	mh_MhA1_Contig2034		mh_MhA1_Contig2034	A
OG0003853	A	meloidogyne_hapla.PRJNA29083.WBPS14	transcript:MhA1_Contig163.frz3.gene23	mh_13A.17		mh_13A.17	A
OG0003858	A	meloidogyne_hapla.PRJNA29083.WBPS14	transcript:MhA1_Contig783.frz3.gene14	mh_4		mh_4	A
OG0003860	A	meloidogyne_hapla.PRJNA29083.WBPS14	transcript:MhA1_Contig786.frz3.gene2	mh_MhA1_Contig786		mh_MhA1_Contig786	A
OG0003862	C	meloidogyne_hapla.PRJNA29083.WBPS14	transcript:MhA1_Contig686.frz3.gene18	mh_4		mh_4	C
OG0003863	C	meloidogyne_hapla.PRJNA29083.WBPS14	transcript:MhA1_Contig147.frz3.gene68	mh_6		mh_6	C
OG0003864	C	meloidogyne_hapla.PRJNA29083.WBPS14	transcript:MhA1_Contig147.frz3.gene66	mh_6		mh_6	C
OG0003865	C	meloidogyne_hapla.PRJNA29083.WBPS14	transcript:MhA1_Contig151.frz3.gene3	mh_21		mh_21	C
OG0003866	C	meloidogyne_hapla.PRJNA29083.WBPS14	transcript:MhA1_Contig707.frz3.gene7	mh_MhA1_Contig707		mh_MhA1_Contig707	C
OG0003867	C	meloidogyne_hapla.PRJNA29083.WBPS14	transcript:MhA1_Contig1864.frz3.gene3	mh_13A.17		mh_13A.17	C
OG0003868	C	meloidogyne_hapla.PRJNA29083.WBPS14	transcript:MhA1_Contig581.frz3.gene9	mh_5		mh_5	C
OG0003872	C	meloidogyne_hapla.PRJNA29083.WBPS14	transcript:MhA1_Contig194.frz3.fgene7	mh_MhA1_Contig194		mh_MhA1_Contig194	C
OG0003873	C	meloidogyne_hapla.PRJNA29083.WBPS14	transcript:MhA1_Contig316.frz3.gene4	mh_5		mh_5	C
OG0003877	C	meloidogyne_hapla.PRJNA29083.WBPS14	transcript:MhA1_Contig704.frz3.gene1	mh_MhA1_Contig704		mh_MhA1_Contig704	C
OG0003881	A	meloidogyne_hapla.PRJNA29083.WBPS14	transcript:MhA1_Contig594.frz3.gene5	mh_MhA1_Contig594		mh_MhA1_Contig594	A
OG0003882	A	meloidogyne_hapla.PRJNA29083.WBPS14	transcript:MhA1_Contig1430.frz3.fgene2	mh_MhA1_Contig1430		mh_MhA1_Contig1430	A
OG0003885	A	meloidogyne_hapla.PRJNA29083.WBPS14	transcript:MhA1_Contig213.frz3.gene64	mh_MhA1_Contig213		mh_MhA1_Contig213	A
OG0003886	A	meloidogyne_hapla.PRJNA29083.WBPS14	transcript:MhA1_Contig2378.frz3.gene1	mh_1B		mh_1B	A
OG0003887	A	meloidogyne_hapla.PRJNA29083.WBPS14	transcript:MhA1_Contig353.frz3.gene41	mh_13B		mh_13B	A
OG0003888	A	meloidogyne_hapla.PRJNA29083.WBPS14	transcript:MhA1_Contig353.frz3.gene40	mh_13B		mh_13B	A
OG0003889	A	meloidogyne_hapla.PRJNA29083.WBPS14	transcript:MhA1_Contig515.frz3.fgene1	mh_10.12.18		mh_10.12.18	A
OG0003890	A	meloidogyne_hapla.PRJNA29083.WBPS14	transcript:MhA1_Contig1882.frz3.gene8	mh_3		mh_3	A
OG0003891	A	meloidogyne_hapla.PRJNA29083.WBPS14	transcript:MhA1_Contig484.frz3.gene28	mh_1A		mh_1A	A
OG0003893	A	meloidogyne_hapla.PRJNA29083.WBPS14	transcript:MhA1_Contig819.frz3.gene11	mh_1A		mh_1A	A
OG0003895	A	meloidogyne_hapla.PRJNA29083.WBPS14	transcript:MhA1_Contig123.frz3.fgene9	mh_13A.17		mh_13A.17	A
OG0003896	A	meloidogyne_hapla.PRJNA29083.WBPS14	transcript:MhA1_Contig2298.frz3.gene1	mh_MhA1_Contig2298		mh_MhA1_Contig2298	A
OG0003899	A	meloidogyne_hapla.PRJNA29083.WBPS14	transcript:MhA1_Contig163.frz3.gene24	mh_13A.17		mh_13A.17	A
OG0003901	A	meloidogyne_hapla.PRJNA29083.WBPS14	transcript:MhA1_Contig508.frz3.gene23	mh_20		mh_20	A
OG0003904	C	meloidogyne_hapla.PRJNA29083.WBPS14	transcript:MhA1_Contig96.frz3.fgene3	mh_3		mh_3	C
OG0003905	C	meloidogyne_hapla.PRJNA29083.WBPS14	transcript:MhA1_Contig117.frz3.gene15	mh_4		mh_4	C
OG0003909	A	meloidogyne_hapla.PRJNA29083.WBPS14	transcript:MhA1_Contig630.frz3.gene7	mh_1A		mh_1A	A
OG0003910	A	meloidogyne_hapla.PRJNA29083.WBPS14	transcript:MhA1_Contig630.frz3.gene17	mh_1A		mh_1A	A
OG0003912	N	meloidogyne_hapla.PRJNA29083.WBPS14	transcript:MhA1_Contig0.frz3.gene34	mh_15		mh_15	N
OG0003926	C	meloidogyne_hapla.PRJNA29083.WBPS14	transcript:MhA1_Contig709.frz3.gene2	mh_10.12.18		mh_10.12.18	C
OG0003927	C	meloidogyne_hapla.PRJNA29083.WBPS14	transcript:MhA1_Contig117.frz3.gene9	mh_4		mh_4	C
OG0003932	C	meloidogyne_hapla.PRJNA29083.WBPS14	transcript:MhA1_Contig118.frz3.gene83	mh_16		mh_16	C
OG0003933	C	meloidogyne_hapla.PRJNA29083.WBPS14	transcript:MhA1_Contig113.frz3.gene47	mh_4		mh_4	C
OG0003934	C	meloidogyne_hapla.PRJNA29083.WBPS14	transcript:MhA1_Contig389.frz3.fgene1	mh_4		mh_4	C
OG0003941	C	meloidogyne_hapla.PRJNA29083.WBPS14	transcript:MhA1_Contig387.frz3.gene16	mh_4		mh_4	C
OG0003942	C	meloidogyne_hapla.PRJNA29083.WBPS14	transcript:MhA1_Contig34.frz3.gene19	mh_MhA1_Contig34		mh_MhA1_Contig34	C
OG0003943	A	meloidogyne_hapla.PRJNA29083.WBPS14	transcript:MhA1_Contig26.frz3.gene22	mh_1B		mh_1B	A
OG0003946	A	meloidogyne_hapla.PRJNA29083.WBPS14	transcript:MhA1_Contig1247.frz3.gene9	mh_MhA1_Contig1247		mh_MhA1_Contig1247	A
OG0003947	A	meloidogyne_hapla.PRJNA29083.WBPS14	transcript:MhA1_Contig1070.frz3.gene8	mh_1A		mh_1A	A
OG0003948	A	meloidogyne_hapla.PRJNA29083.WBPS14	transcript:MhA1_Contig91.frz3.gene38	mh_13A.17		mh_13A.17	A
OG0003949	A	meloidogyne_hapla.PRJNA29083.WBPS14	transcript:MhA1_Contig1998.frz3.gene4	mh_MhA1_Contig1998		mh_MhA1_Contig1998	A
OG0003950	A	meloidogyne_hapla.PRJNA29083.WBPS14	transcript:MhA1_Contig1133.frz3.gene11	mh_10.12.18		mh_10.12.18	A
OG0003951	A	meloidogyne_hapla.PRJNA29083.WBPS14	transcript:MhA1_Contig1514.frz3.gene13	mh_13A.17		mh_13A.17	A
OG0003953	A	meloidogyne_hapla.PRJNA29083.WBPS14	transcript:MhA1_Contig1748.frz3.gene3	mh_1A		mh_1A	A
OG0003954	A	meloidogyne_hapla.PRJNA29083.WBPS14	transcript:MhA1_Contig31.frz3.fgene1	mh_1B		mh_1B	A
OG0003956	A	meloidogyne_hapla.PRJNA29083.WBPS14	transcript:MhA1_Contig1040.frz3.gene12	mh_5		mh_5	A
OG0003957	C	meloidogyne_hapla.PRJNA29083.WBPS14	transcript:MhA1_Contig2825.frz3.gene2	mh_MhA1_Contig2825		mh_MhA1_Contig2825	C
OG0003959	C	meloidogyne_hapla.PRJNA29083.WBPS14	transcript:MhA1_Contig147.frz3.gene41	mh_6		mh_6	C
OG0003960	C	meloidogyne_hapla.PRJNA29083.WBPS14	transcript:MhA1_Contig1259.frz3.gene2	mh_MhA1_Contig1259		mh_MhA1_Contig1259	C
OG0003961	A	meloidogyne_hapla.PRJNA29083.WBPS14	transcript:MhA1_Contig109.frz3.gene4	mh_MhA1_Contig109		mh_MhA1_Contig109	A
OG0003962	A	meloidogyne_hapla.PRJNA29083.WBPS14	transcript:MhA1_Contig185.frz3.fgene1	mh_6		mh_6	A
OG0003966	A	meloidogyne_hapla.PRJNA29083.WBPS14	transcript:MhA1_Contig825.frz3.gene13	mh_2B		mh_2B	A
OG0003967	A	meloidogyne_hapla.PRJNA29083.WBPS14	transcript:MhA1_Contig70.frz3.gene40	mh_1B		mh_1B	A
OG0003970	A	meloidogyne_hapla.PRJNA29083.WBPS14	transcript:MhA1_Contig413.frz3.gene4	mh_2B		mh_2B	A
OG0003973	A	meloidogyne_hapla.PRJNA29083.WBPS14	transcript:MhA1_Contig334.frz3.gene3	mh_7		mh_7	A
OG0003977	A	meloidogyne_hapla.PRJNA29083.WBPS14	transcript:MhA1_Contig1535.frz3.gene3	mh_2A		mh_2A	A
OG0003979	A	meloidogyne_hapla.PRJNA29083.WBPS14	transcript:MhA1_Contig630.frz3.gene3	mh_1A		mh_1A	A
OG0003981	A	meloidogyne_hapla.PRJNA29083.WBPS14	transcript:MhA1_Contig759.frz3.fgene1	mh_21		mh_21	A
OG0003982	A	meloidogyne_hapla.PRJNA29083.WBPS14	transcript:MhA1_Contig630.frz3.gene19	mh_1A		mh_1A	A
OG0003983	A	meloidogyne_hapla.PRJNA29083.WBPS14	transcript:MhA1_Contig695.frz3.gene2	mh_MhA1_Contig695		mh_MhA1_Contig695	A
OG0003985	N	meloidogyne_hapla.PRJNA29083.WBPS14	transcript:MhA1_Contig43.frz3.gene5	mh_4		mh_4	N
OG0003989	N	meloidogyne_hapla.PRJNA29083.WBPS14	transcript:MhA1_Contig618.frz3.gene2	mh_11		mh_11	N
OG0003991	N	meloidogyne_hapla.PRJNA29083.WBPS14	transcript:MhA1_Contig2416.frz3.gene3	mh_21		mh_21	N
OG0003996	N	meloidogyne_hapla.PRJNA29083.WBPS14	transcript:MhA1_Contig822.frz3.gene3	mh_MhA1_Contig822		mh_MhA1_Contig822	N
OG0004003	N	meloidogyne_hapla.PRJNA29083.WBPS14	transcript:MhA1_Contig180.frz3.gene1	mh_11		mh_11	N
OG0004009	N	meloidogyne_hapla.PRJNA29083.WBPS14	transcript:MhA1_Contig55.frz3.fgene4	mh_MhA1_Contig55		mh_MhA1_Contig55	N
OG0004010	N	meloidogyne_hapla.PRJNA29083.WBPS14	transcript:MhA1_Contig88.frz3.gene43	mh_11		mh_11	N
OG0004016	N	meloidogyne_hapla.PRJNA29083.WBPS14	transcript:MhA1_Contig1157.frz3.gene1	mh_2A		mh_2A	N
OG0004017	N	meloidogyne_hapla.PRJNA29083.WBPS14	transcript:MhA1_Contig1955.frz3.gene5	mh_1A		mh_1A	N
OG0004018	C	meloidogyne_hapla.PRJNA29083.WBPS14	transcript:MhA1_Contig1263.frz3.gene9	mh_4		mh_4	C
OG0004019	C	meloidogyne_hapla.PRJNA29083.WBPS14	transcript:MhA1_Contig630.frz3.gene24	mh_1A		mh_1A	C
OG0004021	C	meloidogyne_hapla.PRJNA29083.WBPS14	transcript:MhA1_Contig113.frz3.gene17	mh_4		mh_4	C
OG0004022	A	meloidogyne_hapla.PRJNA29083.WBPS14	transcript:MhA1_Contig819.frz3.gene20	mh_1A		mh_1A	A
OG0004025	A	meloidogyne_hapla.PRJNA29083.WBPS14	transcript:MhA1_Contig110.frz3.gene17	mh_MhA1_Contig110		mh_MhA1_Contig110	A
OG0004030	A	meloidogyne_hapla.PRJNA29083.WBPS14	transcript:MhA1_Contig134.frz3.gene10	mh_6		mh_6	A
OG0004031	A	meloidogyne_hapla.PRJNA29083.WBPS14	transcript:MhA1_Contig819.frz3.gene10	mh_1A		mh_1A	A
OG0004034	C	meloidogyne_hapla.PRJNA29083.WBPS14	transcript:MhA1_Contig389.frz3.gene5	mh_4		mh_4	C
OG0004041	A	meloidogyne_hapla.PRJNA29083.WBPS14	transcript:MhA1_Contig964.frz3.gene3	mh_1A		mh_1A	A
OG0004043	X	meloidogyne_hapla.PRJNA29083.WBPS14	transcript:MhA1_Contig147.frz3.gene10	mh_6		mh_6	X
OG0004046	X	meloidogyne_hapla.PRJNA29083.WBPS14	transcript:MhA1_Contig977.frz3.gene3	mh_MhA1_Contig977		mh_MhA1_Contig977	X
OG0004049	X	meloidogyne_hapla.PRJNA29083.WBPS14	transcript:MhA1_Contig1162.frz3.fgene1	mh_MhA1_Contig1162		mh_MhA1_Contig1162	X
OG0004050	X	meloidogyne_hapla.PRJNA29083.WBPS14	transcript:MhA1_Contig1709.frz3.gene1	mh_MhA1_Contig1709		mh_MhA1_Contig1709	X
OG0004051	X	meloidogyne_hapla.PRJNA29083.WBPS14	transcript:MhA1_Contig165.frz3.gene2	mh_13A.17		mh_13A.17	X
OG0004053	X	meloidogyne_hapla.PRJNA29083.WBPS14	transcript:MhA1_Contig291.frz3.gene9	mh_13A.17		mh_13A.17	X
OG0004054	X	meloidogyne_hapla.PRJNA29083.WBPS14	transcript:MhA1_Contig293.frz3.gene3	mh_MhA1_Contig293		mh_MhA1_Contig293	X
OG0004056	X	meloidogyne_hapla.PRJNA29083.WBPS14	transcript:MhA1_Contig140.frz3.gene1	mh_6		mh_6	X
OG0004059	X	meloidogyne_hapla.PRJNA29083.WBPS14	transcript:MhA1_Contig651.frz3.gene5	mh_MhA1_Contig651		mh_MhA1_Contig651	X
OG0004060	X	meloidogyne_hapla.PRJNA29083.WBPS14	transcript:MhA1_Contig576.frz3.fgene1	mh_MhA1_Contig576		mh_MhA1_Contig576	X
OG0004062	X	meloidogyne_hapla.PRJNA29083.WBPS14	transcript:MhA1_Contig776.frz3.gene8	mh_8		mh_8	X
OG0004064	X	meloidogyne_hapla.PRJNA29083.WBPS14	transcript:MhA1_Contig1242.frz3.gene1	mh_MhA1_Contig1242		mh_MhA1_Contig1242	X
OG0004067	X	meloidogyne_hapla.PRJNA29083.WBPS14	transcript:MhA1_Contig367.frz3.gene4	mh_MhA1_Contig367		mh_MhA1_Contig367	X
OG0004078	D	meloidogyne_hapla.PRJNA29083.WBPS14	transcript:MhA1_Contig590.frz3.gene21	mh_1B		mh_1B	D
OG0004079	D	meloidogyne_hapla.PRJNA29083.WBPS14	transcript:MhA1_Contig1535.frz3.gene21	mh_2A		mh_2A	D
OG0004082	D	meloidogyne_hapla.PRJNA29083.WBPS14	transcript:MhA1_Contig659.frz3.gene1	mh_4		mh_4	D
OG0004083	D	meloidogyne_hapla.PRJNA29083.WBPS14	transcript:MhA1_Contig368.frz3.gene2	mh_MhA1_Contig368		mh_MhA1_Contig368	D
OG0004088	D	meloidogyne_hapla.PRJNA29083.WBPS14	transcript:MhA1_Contig914.frz3.fgene3	mh_16		mh_16	D
OG0004094	D	meloidogyne_hapla.PRJNA29083.WBPS14	transcript:MhA1_Contig42.frz3.gene21	mh_4		mh_4	D
OG0004097	D	meloidogyne_hapla.PRJNA29083.WBPS14	transcript:MhA1_Contig1686.frz3.gene5	mh_MhA1_Contig1686		mh_MhA1_Contig1686	D
OG0004100	D	meloidogyne_hapla.PRJNA29083.WBPS14	transcript:MhA1_Contig83.frz3.fgene1	mh_5		mh_5	D
OG0004101	D	meloidogyne_hapla.PRJNA29083.WBPS14	transcript:MhA1_Contig1032.frz3.fgene5	mh_2B		mh_2B	D
OG0004102	D	meloidogyne_hapla.PRJNA29083.WBPS14	transcript:MhA1_Contig2140.frz3.gene1	mh_4		mh_4	D
OG0004104	D	meloidogyne_hapla.PRJNA29083.WBPS14	transcript:MhA1_Contig107.frz3.gene15	mh_13B		mh_13B	D
OG0004107	D	meloidogyne_hapla.PRJNA29083.WBPS14	transcript:MhA1_Contig1390.frz3.gene3	mh_MhA1_Contig1390		mh_MhA1_Contig1390	D
OG0004109	D	meloidogyne_hapla.PRJNA29083.WBPS14	transcript:MhA1_Contig418.frz3.gene10	mh_2B		mh_2B	D
OG0004110	D	meloidogyne_hapla.PRJNA29083.WBPS14	transcript:MhA1_Contig20.frz3.gene55	mh_2A		mh_2A	D
OG0004114	D	meloidogyne_hapla.PRJNA29083.WBPS14	transcript:MhA1_Contig1555.frz3.gene18	mh_2B		mh_2B	D
OG0004116	D	meloidogyne_hapla.PRJNA29083.WBPS14	transcript:MhA1_Contig333.frz3.fgene3	mh_13A.17		mh_13A.17	D
OG0004120	D	meloidogyne_hapla.PRJNA29083.WBPS14	transcript:MhA1_Contig527.frz3.gene3	mh_2B		mh_2B	D
OG0004123	D	meloidogyne_hapla.PRJNA29083.WBPS14	transcript:MhA1_Contig242.frz3.gene1	mh_MhA1_Contig242		mh_MhA1_Contig242	D
OG0004124	D	meloidogyne_hapla.PRJNA29083.WBPS14	transcript:MhA1_Contig1764.frz3.gene9	mh_2A		mh_2A	D
OG0004132	D	meloidogyne_hapla.PRJNA29083.WBPS14	transcript:MhA1_Contig912.frz3.fgene4	mh_16		mh_16	D
OG0004140	D	meloidogyne_hapla.PRJNA29083.WBPS14	transcript:MhA1_Contig686.frz3.fgene2	mh_4		mh_4	D
OG0004142	D	meloidogyne_hapla.PRJNA29083.WBPS14	transcript:MhA1_Contig1507.frz3.gene5	mh_4		mh_4	D
OG0004144	D	meloidogyne_hapla.PRJNA29083.WBPS14	transcript:MhA1_Contig64.frz3.gene9	mh_MhA1_Contig64		mh_MhA1_Contig64	D
OG0004146	D	meloidogyne_hapla.PRJNA29083.WBPS14	transcript:MhA1_Contig1281.frz3.gene6	mh_MhA1_Contig1281		mh_MhA1_Contig1281	D
OG0004151	D	meloidogyne_hapla.PRJNA29083.WBPS14	transcript:MhA1_Contig759.frz3.gene8	mh_21		mh_21	D
OG0004152	D	meloidogyne_hapla.PRJNA29083.WBPS14	transcript:MhA1_Contig20.frz3.gene50	mh_2A		mh_2A	D
OG0004160	D	meloidogyne_hapla.PRJNA29083.WBPS14	transcript:MhA1_Contig78.frz3.gene41	mh_5		mh_5	D
OG0004162	D	meloidogyne_hapla.PRJNA29083.WBPS14	transcript:MhA1_Contig914.frz3.gene13	mh_16		mh_16	D
OG0004166	D	meloidogyne_hapla.PRJNA29083.WBPS14	transcript:MhA1_Contig107.frz3.fgene3	mh_13B		mh_13B	D
OG0004172	D	meloidogyne_hapla.PRJNA29083.WBPS14	transcript:MhA1_Contig643.frz3.gene4	mh_MhA1_Contig643		mh_MhA1_Contig643	D
OG0004174	D	meloidogyne_hapla.PRJNA29083.WBPS14	transcript:MhA1_Contig342.frz3.fgene3	mh_3		mh_3	D
OG0004175	D	meloidogyne_hapla.PRJNA29083.WBPS14	transcript:MhA1_Contig20.frz3.gene47	mh_2A		mh_2A	D
OG0004180	D	meloidogyne_hapla.PRJNA29083.WBPS14	transcript:MhA1_Contig1507.frz3.gene9	mh_4		mh_4	D
OG0004181	D	meloidogyne_hapla.PRJNA29083.WBPS14	transcript:MhA1_Contig809.frz3.gene23	mh_3		mh_3	D
OG0004184	D	meloidogyne_hapla.PRJNA29083.WBPS14	transcript:MhA1_Contig2854.frz3.gene1	mh_MhA1_Contig2854		mh_MhA1_Contig2854	D
OG0004185	D	meloidogyne_hapla.PRJNA29083.WBPS14	transcript:MhA1_Contig2925.frz3.gene1	mh_MhA1_Contig2925		mh_MhA1_Contig2925	D
OG0004186	D	meloidogyne_hapla.PRJNA29083.WBPS14	transcript:MhA1_Contig1595.frz3.gene3	mh_4		mh_4	D
OG0004187	D	meloidogyne_hapla.PRJNA29083.WBPS14	transcript:MhA1_Contig20.frz3.gene48	mh_2A		mh_2A	D
OG0004188	D	meloidogyne_hapla.PRJNA29083.WBPS14	transcript:MhA1_Contig297.frz3.gene5	mh_21		mh_21	D
OG0004189	D	meloidogyne_hapla.PRJNA29083.WBPS14	transcript:MhA1_Contig1976.frz3.gene2	mh_MhA1_Contig1976		mh_MhA1_Contig1976	D
OG0004197	D	meloidogyne_hapla.PRJNA29083.WBPS14	transcript:MhA1_Contig1507.frz3.gene8	mh_4		mh_4	D
OG0004202	D	meloidogyne_hapla.PRJNA29083.WBPS14	transcript:MhA1_Contig726.frz3.gene5	mh_MhA1_Contig726		mh_MhA1_Contig726	D
OG0004207	B	meloidogyne_hapla.PRJNA29083.WBPS14	transcript:MhA1_Contig892.frz3.gene1	mh_MhA1_Contig892		mh_MhA1_Contig892	B
OG0004208	B	meloidogyne_hapla.PRJNA29083.WBPS14	transcript:MhA1_Contig96.frz3.gene4	mh_3		mh_3	B
OG0004211	B	meloidogyne_hapla.PRJNA29083.WBPS14	transcript:MhA1_Contig82.frz3.gene12	mh_5		mh_5	B
OG0004212	B	meloidogyne_hapla.PRJNA29083.WBPS14	transcript:MhA1_Contig906.frz3.gene2	mh_2A		mh_2A	B
OG0004214	B	meloidogyne_hapla.PRJNA29083.WBPS14	transcript:MhA1_Contig512.frz3.fgene1	mh_5		mh_5	B
OG0004215	B	meloidogyne_hapla.PRJNA29083.WBPS14	transcript:MhA1_Contig893.frz3.gene11	mh_10.12.18		mh_10.12.18	B
OG0004216	B	meloidogyne_hapla.PRJNA29083.WBPS14	transcript:MhA1_Contig1665.frz3.gene5	mh_MhA1_Contig1665		mh_MhA1_Contig1665	B
OG0004221	B	meloidogyne_hapla.PRJNA29083.WBPS14	transcript:MhA1_Contig1358.frz3.gene6	mh_MhA1_Contig1358		mh_MhA1_Contig1358	B
OG0004223	B	meloidogyne_hapla.PRJNA29083.WBPS14	transcript:MhA1_Contig100.frz3.gene12	mh_3		mh_3	B
OG0004225	B	meloidogyne_hapla.PRJNA29083.WBPS14	transcript:MhA1_Contig1692.frz3.gene3	mh_2A		mh_2A	B
OG0004227	B	meloidogyne_hapla.PRJNA29083.WBPS14	transcript:MhA1_Contig1177.frz3.gene6	mh_2A		mh_2A	B
OG0004228	B	meloidogyne_hapla.PRJNA29083.WBPS14	transcript:MhA1_Contig130.frz3.gene60	mh_13A.17		mh_13A.17	B
OG0004230	B	meloidogyne_hapla.PRJNA29083.WBPS14	transcript:MhA1_Contig1566.frz3.gene6	mh_5		mh_5	B
OG0004231	B	meloidogyne_hapla.PRJNA29083.WBPS14	transcript:MhA1_Contig1782.frz3.gene9	mh_3		mh_3	B
OG0004235	B	meloidogyne_hapla.PRJNA29083.WBPS14	transcript:MhA1_Contig174.frz3.fgene4	mh_8		mh_8	B
OG0004237	B	meloidogyne_hapla.PRJNA29083.WBPS14	transcript:MhA1_Contig123.frz3.gene63	mh_13A.17		mh_13A.17	B
OG0004238	B	meloidogyne_hapla.PRJNA29083.WBPS14	transcript:MhA1_Contig167.frz3.gene3	mh_1A		mh_1A	B
OG0004239	B	meloidogyne_hapla.PRJNA29083.WBPS14	transcript:MhA1_Contig167.frz3.gene10	mh_1A		mh_1A	B
OG0004241	B	meloidogyne_hapla.PRJNA29083.WBPS14	transcript:MhA1_Contig825.frz3.gene6	mh_2B		mh_2B	B
OG0004243	B	meloidogyne_hapla.PRJNA29083.WBPS14	transcript:MhA1_Contig410.frz3.fgene1	mh_2B		mh_2B	B
OG0004244	B	meloidogyne_hapla.PRJNA29083.WBPS14	transcript:MhA1_Contig1472.frz3.gene3	mh_3		mh_3	B
OG0004246	B	meloidogyne_hapla.PRJNA29083.WBPS14	transcript:MhA1_Contig684.frz3.gene16	mh_10.12.18		mh_10.12.18	B
OG0004247	B	meloidogyne_hapla.PRJNA29083.WBPS14	transcript:MhA1_Contig1051.frz3.gene17	mh_10.12.18		mh_10.12.18	B
OG0004248	B	meloidogyne_hapla.PRJNA29083.WBPS14	transcript:MhA1_Contig827.frz3.gene7	mh_2B		mh_2B	B
OG0004250	B	meloidogyne_hapla.PRJNA29083.WBPS14	transcript:MhA1_Contig168.frz3.gene2	mh_1A		mh_1A	B
OG0004253	B	meloidogyne_hapla.PRJNA29083.WBPS14	transcript:MhA1_Contig316.frz3.gene15	mh_5		mh_5	B
OG0004260	B	meloidogyne_hapla.PRJNA29083.WBPS14	transcript:MhA1_Contig1160.frz3.gene4	mh_MhA1_Contig1160		mh_MhA1_Contig1160	B
OG0004263	B	meloidogyne_hapla.PRJNA29083.WBPS14	transcript:MhA1_Contig1256.frz3.gene3	mh_2B		mh_2B	B
OG0004264	B	meloidogyne_hapla.PRJNA29083.WBPS14	transcript:MhA1_Contig1256.frz3.gene4	mh_2B		mh_2B	B
OG0004269	B	meloidogyne_hapla.PRJNA29083.WBPS14	transcript:MhA1_Contig1032.frz3.fgene1	mh_2B		mh_2B	B
OG0004271	B	meloidogyne_hapla.PRJNA29083.WBPS14	transcript:MhA1_Contig1246.frz3.gene17	mh_5		mh_5	B
OG0004273	B	meloidogyne_hapla.PRJNA29083.WBPS14	transcript:MhA1_Contig512.frz3.gene18	mh_5		mh_5	B
OG0004274	B	meloidogyne_hapla.PRJNA29083.WBPS14	transcript:MhA1_Contig905.frz3.fgene1	mh_MhA1_Contig905		mh_MhA1_Contig905	B
OG0004276	B	meloidogyne_hapla.PRJNA29083.WBPS14	transcript:MhA1_Contig770.frz3.gene5	mh_13A.17		mh_13A.17	B
OG0004277	B	meloidogyne_hapla.PRJNA29083.WBPS14	transcript:MhA1_Contig284.frz3.gene4	mh_5		mh_5	B
OG0004279	B	meloidogyne_hapla.PRJNA29083.WBPS14	transcript:MhA1_Contig213.frz3.gene41	mh_MhA1_Contig213		mh_MhA1_Contig213	B
OG0004281	B	meloidogyne_hapla.PRJNA29083.WBPS14	transcript:MhA1_Contig1698.frz3.gene10	mh_10.12.18		mh_10.12.18	B
OG0004285	B	meloidogyne_hapla.PRJNA29083.WBPS14	transcript:MhA1_Contig1665.frz3.gene6	mh_MhA1_Contig1665		mh_MhA1_Contig1665	B
OG0004287	B	meloidogyne_hapla.PRJNA29083.WBPS14	transcript:MhA1_Contig1921.frz3.gene8	mh_3		mh_3	B
OG0004288	B	meloidogyne_hapla.PRJNA29083.WBPS14	transcript:MhA1_Contig800.frz3.fgene2	mh_5		mh_5	B
OG0004295	B	meloidogyne_hapla.PRJNA29083.WBPS14	transcript:MhA1_Contig1732.frz3.gene16	mh_1A		mh_1A	B
OG0004296	B	meloidogyne_hapla.PRJNA29083.WBPS14	transcript:MhA1_Contig1294.frz3.gene12	mh_7		mh_7	B
OG0004299	B	meloidogyne_hapla.PRJNA29083.WBPS14	transcript:MhA1_Contig893.frz3.fgene2	mh_10.12.18		mh_10.12.18	B
OG0004301	B	meloidogyne_hapla.PRJNA29083.WBPS14	transcript:MhA1_Contig1316.frz3.gene3	mh_8		mh_8	B
OG0004303	B	meloidogyne_hapla.PRJNA29083.WBPS14	transcript:MhA1_Contig829.frz3.gene5	mh_10.12.18		mh_10.12.18	B
OG0004304	B	meloidogyne_hapla.PRJNA29083.WBPS14	transcript:MhA1_Contig840.frz3.gene12	mh_1B		mh_1B	B
OG0004305	B	meloidogyne_hapla.PRJNA29083.WBPS14	transcript:MhA1_Contig1070.frz3.gene1	mh_1A		mh_1A	B
OG0004308	B	meloidogyne_hapla.PRJNA29083.WBPS14	transcript:MhA1_Contig729.frz3.gene9	mh_MhA1_Contig729		mh_MhA1_Contig729	B
OG0004310	B	meloidogyne_hapla.PRJNA29083.WBPS14	transcript:MhA1_Contig25.frz3.fgene1	mh_1B		mh_1B	B
OG0004311	B	meloidogyne_hapla.PRJNA29083.WBPS14	transcript:MhA1_Contig1172.frz3.fgene1	mh_5		mh_5	B
OG0004313	B	meloidogyne_hapla.PRJNA29083.WBPS14	transcript:MhA1_Contig1067.frz3.gene4	mh_MhA1_Contig1067		mh_MhA1_Contig1067	B
OG0004316	B	meloidogyne_hapla.PRJNA29083.WBPS14	transcript:MhA1_Contig1878.frz3.fgene1	mh_MhA1_Contig1878		mh_MhA1_Contig1878	B
OG0004319	B	meloidogyne_hapla.PRJNA29083.WBPS14	transcript:MhA1_Contig405.frz3.gene5	mh_20		mh_20	B
OG0004320	B	meloidogyne_hapla.PRJNA29083.WBPS14	transcript:MhA1_Contig590.frz3.fgene3	mh_1B		mh_1B	B
OG0004321	B	meloidogyne_hapla.PRJNA29083.WBPS14	transcript:MhA1_Contig1768.frz3.gene11	mh_2B		mh_2B	B
OG0004323	B	meloidogyne_hapla.PRJNA29083.WBPS14	transcript:MhA1_Contig877.frz3.gene20	mh_5		mh_5	B
OG0004324	B	meloidogyne_hapla.PRJNA29083.WBPS14	transcript:MhA1_Contig385.frz3.gene10	mh_10.12.18		mh_10.12.18	B
OG0004446	E	meloidogyne_hapla.PRJNA29083.WBPS14	transcript:MhA1_Contig1356.frz3.gene12	mh_16		mh_16	E
OG0004447	E	meloidogyne_hapla.PRJNA29083.WBPS14	transcript:MhA1_Contig262.frz3.gene25	mh_MhA1_Contig262		mh_MhA1_Contig262	E
OG0004448	E	meloidogyne_hapla.PRJNA29083.WBPS14	transcript:MhA1_Contig781.frz3.gene1	mh_13A.17		mh_13A.17	E
OG0004449	E	meloidogyne_hapla.PRJNA29083.WBPS14	transcript:MhA1_Contig1995.frz3.gene6	mh_MhA1_Contig1995		mh_MhA1_Contig1995	E
OG0004450	E	meloidogyne_hapla.PRJNA29083.WBPS14	transcript:MhA1_Contig179.frz3.gene5	mh_11		mh_11	E
OG0004455	E	meloidogyne_hapla.PRJNA29083.WBPS14	transcript:MhA1_Contig118.frz3.gene26	mh_16		mh_16	E
OG0004460	E	meloidogyne_hapla.PRJNA29083.WBPS14	transcript:MhA1_Contig1322.frz3.gene23	mh_2B		mh_2B	E
OG0004466	E	meloidogyne_hapla.PRJNA29083.WBPS14	transcript:MhA1_Contig90.frz3.gene7	mh_13A.17		mh_13A.17	E
OG0004467	E	meloidogyne_hapla.PRJNA29083.WBPS14	transcript:MhA1_Contig1460.frz3.gene2	mh_MhA1_Contig1460		mh_MhA1_Contig1460	E
OG0004470	E	meloidogyne_hapla.PRJNA29083.WBPS14	transcript:MhA1_Contig1227.frz3.gene4	mh_MhA1_Contig1227		mh_MhA1_Contig1227	E
OG0004471	E	meloidogyne_hapla.PRJNA29083.WBPS14	transcript:MhA1_Contig468.frz3.gene11	mh_13A.17		mh_13A.17	E
OG0004474	E	meloidogyne_hapla.PRJNA29083.WBPS14	transcript:MhA1_Contig1588.frz3.gene10	mh_MhA1_Contig1588		mh_MhA1_Contig1588	E
OG0004475	E	meloidogyne_hapla.PRJNA29083.WBPS14	transcript:MhA1_Contig1032.frz3.gene14	mh_2B		mh_2B	E
OG0004476	E	meloidogyne_hapla.PRJNA29083.WBPS14	transcript:MhA1_Contig1499.frz3.gene12	mh_MhA1_Contig1499		mh_MhA1_Contig1499	E
OG0004477	E	meloidogyne_hapla.PRJNA29083.WBPS14	transcript:MhA1_Contig168.frz3.gene31	mh_1A		mh_1A	E
OG0004481	E	meloidogyne_hapla.PRJNA29083.WBPS14	transcript:MhA1_Contig1987.frz3.gene5	mh_MhA1_Contig1987		mh_MhA1_Contig1987	E
OG0004484	E	meloidogyne_hapla.PRJNA29083.WBPS14	transcript:MhA1_Contig342.frz3.gene8	mh_3		mh_3	E
OG0004489	E	meloidogyne_hapla.PRJNA29083.WBPS14	transcript:MhA1_Contig1472.frz3.gene5	mh_3		mh_3	E
OG0004490	E	meloidogyne_hapla.PRJNA29083.WBPS14	transcript:MhA1_Contig1225.frz3.gene8	mh_MhA1_Contig1225		mh_MhA1_Contig1225	E
OG0004491	E	meloidogyne_hapla.PRJNA29083.WBPS14	transcript:MhA1_Contig2678.frz3.gene1	mh_MhA1_Contig2678		mh_MhA1_Contig2678	E
OG0004493	E	meloidogyne_hapla.PRJNA29083.WBPS14	transcript:MhA1_Contig492.frz3.gene3	mh_4		mh_4	E
OG0004497	E	meloidogyne_hapla.PRJNA29083.WBPS14	transcript:MhA1_Contig3042.frz3.gene1	mh_MhA1_Contig3042		mh_MhA1_Contig3042	E
OG0004498	E	meloidogyne_hapla.PRJNA29083.WBPS14	transcript:MhA1_Contig1228.frz3.gene5	mh_MhA1_Contig1228		mh_MhA1_Contig1228	E
OG0004499	E	meloidogyne_hapla.PRJNA29083.WBPS14	transcript:MhA1_Contig119.frz3.gene12	mh_16		mh_16	E
OG0004503	E	meloidogyne_hapla.PRJNA29083.WBPS14	transcript:MhA1_Contig261.frz3.gene38	mh_2B		mh_2B	E
OG0004506	E	meloidogyne_hapla.PRJNA29083.WBPS14	transcript:MhA1_Contig394.frz3.gene13	mh_MhA1_Contig394		mh_MhA1_Contig394	E
OG0004507	E	meloidogyne_hapla.PRJNA29083.WBPS14	transcript:MhA1_Contig604.frz3.gene6	mh_MhA1_Contig604		mh_MhA1_Contig604	E
OG0004508	E	meloidogyne_hapla.PRJNA29083.WBPS14	transcript:MhA1_Contig123.frz3.gene22	mh_13A.17		mh_13A.17	E
OG0004515	E	meloidogyne_hapla.PRJNA29083.WBPS14	transcript:MhA1_Contig438.frz3.gene25	mh_16		mh_16	E
OG0004518	E	meloidogyne_hapla.PRJNA29083.WBPS14	transcript:MhA1_Contig194.frz3.fgene2	mh_MhA1_Contig194		mh_MhA1_Contig194	E
OG0004519	E	meloidogyne_hapla.PRJNA29083.WBPS14	transcript:MhA1_Contig2083.frz3.gene1	mh_MhA1_Contig2083		mh_MhA1_Contig2083	E
OG0004520	E	meloidogyne_hapla.PRJNA29083.WBPS14	transcript:MhA1_Contig1486.frz3.gene18	mh_2B		mh_2B	E
OG0004521	E	meloidogyne_hapla.PRJNA29083.WBPS14	transcript:MhA1_Contig1049.frz3.gene13	mh_MhA1_Contig1049		mh_MhA1_Contig1049	E
OG0004523	E	meloidogyne_hapla.PRJNA29083.WBPS14	transcript:MhA1_Contig1835.frz3.fgene2	mh_MhA1_Contig1835		mh_MhA1_Contig1835	E
OG0004524	E	meloidogyne_hapla.PRJNA29083.WBPS14	transcript:MhA1_Contig933.frz3.gene10	mh_16		mh_16	E
OG0004526	E	meloidogyne_hapla.PRJNA29083.WBPS14	transcript:MhA1_Contig2821.frz3.gene1	mh_MhA1_Contig2821		mh_MhA1_Contig2821	E
OG0004527	E	meloidogyne_hapla.PRJNA29083.WBPS14	transcript:MhA1_Contig342.frz3.fgene4	mh_3		mh_3	E
OG0004530	E	meloidogyne_hapla.PRJNA29083.WBPS14	transcript:MhA1_Contig484.frz3.fgene3	mh_1A		mh_1A	E
OG0004537	E	meloidogyne_hapla.PRJNA29083.WBPS14	transcript:MhA1_Contig118.frz3.fgene1	mh_16		mh_16	E
OG0004539	E	meloidogyne_hapla.PRJNA29083.WBPS14	transcript:MhA1_Contig210.frz3.gene23	mh_10.12.18		mh_10.12.18	E
OG0004541	E	meloidogyne_hapla.PRJNA29083.WBPS14	transcript:MhA1_Contig944.frz3.gene2	mh_MhA1_Contig944		mh_MhA1_Contig944	E
OG0004542	E	meloidogyne_hapla.PRJNA29083.WBPS14	transcript:MhA1_Contig952.frz3.gene10	mh_16		mh_16	E
OG0004544	E	meloidogyne_hapla.PRJNA29083.WBPS14	transcript:MhA1_Contig914.frz3.fgene2	mh_16		mh_16	E
OG0004545	E	meloidogyne_hapla.PRJNA29083.WBPS14	transcript:MhA1_Contig1382.frz3.gene3	mh_16		mh_16	E
OG0004547	E	meloidogyne_hapla.PRJNA29083.WBPS14	transcript:MhA1_Contig1416.frz3.gene12	mh_11		mh_11	E
OG0004548	E	meloidogyne_hapla.PRJNA29083.WBPS14	transcript:MhA1_Contig1330.frz3.gene4	mh_16		mh_16	E
OG0004550	E	meloidogyne_hapla.PRJNA29083.WBPS14	transcript:MhA1_Contig118.frz3.gene60	mh_16		mh_16	E
OG0004551	E	meloidogyne_hapla.PRJNA29083.WBPS14	transcript:MhA1_Contig118.frz3.fgene5	mh_16		mh_16	E
OG0004552	E	meloidogyne_hapla.PRJNA29083.WBPS14	transcript:MhA1_Contig2101.frz3.gene1	mh_MhA1_Contig2101		mh_MhA1_Contig2101	E
OG0004555	E	meloidogyne_hapla.PRJNA29083.WBPS14	transcript:MhA1_Contig1358.frz3.gene13	mh_MhA1_Contig1358		mh_MhA1_Contig1358	E
OG0004558	E	meloidogyne_hapla.PRJNA29083.WBPS14	transcript:MhA1_Contig123.frz3.gene30	mh_13A.17		mh_13A.17	E
OG0004560	E	meloidogyne_hapla.PRJNA29083.WBPS14	transcript:MhA1_Contig1363.frz3.gene2	mh_MhA1_Contig1363		mh_MhA1_Contig1363	E
OG0004562	E	meloidogyne_hapla.PRJNA29083.WBPS14	transcript:MhA1_Contig261.frz3.gene43	mh_2B		mh_2B	E
OG0004567	E	meloidogyne_hapla.PRJNA29083.WBPS14	transcript:MhA1_Contig1782.frz3.gene7	mh_3		mh_3	E
OG0004571	E	meloidogyne_hapla.PRJNA29083.WBPS14	transcript:MhA1_Contig914.frz3.gene17	mh_16		mh_16	E
OG0004572	E	meloidogyne_hapla.PRJNA29083.WBPS14	transcript:MhA1_Contig118.frz3.gene47	mh_16		mh_16	E
OG0004573	E	meloidogyne_hapla.PRJNA29083.WBPS14	transcript:MhA1_Contig772.frz3.gene8	mh_MhA1_Contig772		mh_MhA1_Contig772	E
OG0004576	E	meloidogyne_hapla.PRJNA29083.WBPS14	transcript:MhA1_Contig1835.frz3.gene10	mh_MhA1_Contig1835		mh_MhA1_Contig1835	E
OG0004577	E	meloidogyne_hapla.PRJNA29083.WBPS14	transcript:MhA1_Contig252.frz3.gene15	mh_2B		mh_2B	E
OG0004578	E	meloidogyne_hapla.PRJNA29083.WBPS14	transcript:MhA1_Contig1992.frz3.gene6	mh_3		mh_3	E
OG0004579	E	meloidogyne_hapla.PRJNA29083.WBPS14	transcript:MhA1_Contig1987.frz3.gene3	mh_MhA1_Contig1987		mh_MhA1_Contig1987	E
OG0004580	E	meloidogyne_hapla.PRJNA29083.WBPS14	transcript:MhA1_Contig118.frz3.gene7	mh_16		mh_16	E
OG0004582	E	meloidogyne_hapla.PRJNA29083.WBPS14	transcript:MhA1_Contig2021.frz3.fgene2	mh_16		mh_16	E
OG0004584	E	meloidogyne_hapla.PRJNA29083.WBPS14	transcript:MhA1_Contig864.frz3.gene17	mh_7		mh_7	E
OG0004586	E	meloidogyne_hapla.PRJNA29083.WBPS14	transcript:MhA1_Contig728.frz3.gene4	mh_13A.17		mh_13A.17	E
OG0004587	E	meloidogyne_hapla.PRJNA29083.WBPS14	transcript:MhA1_Contig1753.frz3.fgene1	mh_MhA1_Contig1753		mh_MhA1_Contig1753	E
OG0004588	E	meloidogyne_hapla.PRJNA29083.WBPS14	transcript:MhA1_Contig468.frz3.gene12	mh_13A.17		mh_13A.17	E
OG0004589	E	meloidogyne_hapla.PRJNA29083.WBPS14	transcript:MhA1_Contig912.frz3.gene2	mh_16		mh_16	E
OG0004590	E	meloidogyne_hapla.PRJNA29083.WBPS14	transcript:MhA1_Contig118.frz3.gene76	mh_16		mh_16	E
OG0004593	E	meloidogyne_hapla.PRJNA29083.WBPS14	transcript:MhA1_Contig118.frz3.gene50	mh_16		mh_16	E
OG0004594	E	meloidogyne_hapla.PRJNA29083.WBPS14	transcript:MhA1_Contig277.frz3.gene28	mh_3		mh_3	E
OG0004595	E	meloidogyne_hapla.PRJNA29083.WBPS14	transcript:MhA1_Contig1737.frz3.fgene1	mh_MhA1_Contig1737		mh_MhA1_Contig1737	E
OG0004601	N	meloidogyne_hapla.PRJNA29083.WBPS14	transcript:MhA1_Contig123.frz3.fgene10	mh_13A.17		mh_13A.17	N
OG0004602	N	meloidogyne_hapla.PRJNA29083.WBPS14	transcript:MhA1_Contig88.frz3.gene64	mh_11		mh_11	N
OG0004607	N	meloidogyne_hapla.PRJNA29083.WBPS14	transcript:MhA1_Contig239.frz3.gene7	mh_11		mh_11	N
OG0004612	N	meloidogyne_hapla.PRJNA29083.WBPS14	transcript:MhA1_Contig1.frz3.fgene2	mh_MhA1_Contig1		mh_MhA1_Contig1	N
OG0004622	N	meloidogyne_hapla.PRJNA29083.WBPS14	transcript:MhA1_Contig691.frz3.gene13	mh_MhA1_Contig691		mh_MhA1_Contig691	N
OG0004623	N	meloidogyne_hapla.PRJNA29083.WBPS14	transcript:MhA1_Contig2194.frz3.gene3	mh_1A		mh_1A	N
OG0004625	N	meloidogyne_hapla.PRJNA29083.WBPS14	transcript:MhA1_Contig88.frz3.gene23	mh_11		mh_11	N
OG0004628	N	meloidogyne_hapla.PRJNA29083.WBPS14	transcript:MhA1_Contig196.frz3.gene31	mh_21		mh_21	N
OG0004633	N	meloidogyne_hapla.PRJNA29083.WBPS14	transcript:MhA1_Contig234.frz3.gene1	mh_11		mh_11	N
OG0004638	C	meloidogyne_hapla.PRJNA29083.WBPS14	transcript:MhA1_Contig2164.frz3.gene1	mh_MhA1_Contig2164		mh_MhA1_Contig2164	C
OG0004639	C	meloidogyne_hapla.PRJNA29083.WBPS14	transcript:MhA1_Contig133.frz3.gene8	mh_6		mh_6	C
OG0004642	C	meloidogyne_hapla.PRJNA29083.WBPS14	transcript:MhA1_Contig737.frz3.gene16	mh_13A.17		mh_13A.17	C
OG0004644	C	meloidogyne_hapla.PRJNA29083.WBPS14	transcript:MhA1_Contig1352.frz3.gene12	mh_MhA1_Contig1352		mh_MhA1_Contig1352	C
OG0004645	C	meloidogyne_hapla.PRJNA29083.WBPS14	transcript:MhA1_Contig1743.frz3.fgene1	mh_1B		mh_1B	C
OG0004646	C	meloidogyne_hapla.PRJNA29083.WBPS14	transcript:MhA1_Contig354.frz3.gene41	mh_3		mh_3	C
OG0004648	C	meloidogyne_hapla.PRJNA29083.WBPS14	transcript:MhA1_Contig484.frz3.fgene7	mh_1A		mh_1A	C
OG0004649	C	meloidogyne_hapla.PRJNA29083.WBPS14	transcript:MhA1_Contig113.frz3.gene13	mh_4		mh_4	C
OG0004650	C	meloidogyne_hapla.PRJNA29083.WBPS14	transcript:MhA1_Contig116.frz3.gene19	mh_4		mh_4	C
OG0004651	C	meloidogyne_hapla.PRJNA29083.WBPS14	transcript:MhA1_Contig1487.frz3.gene14	mh_MhA1_Contig1487		mh_MhA1_Contig1487	C
OG0004652	C	meloidogyne_hapla.PRJNA29083.WBPS14	transcript:MhA1_Contig540.frz3.gene14	mh_4		mh_4	C
OG0004656	C	meloidogyne_hapla.PRJNA29083.WBPS14	transcript:MhA1_Contig353.frz3.gene3	mh_13B		mh_13B	C
OG0004657	C	meloidogyne_hapla.PRJNA29083.WBPS14	transcript:MhA1_Contig147.frz3.gene65	mh_6		mh_6	C
OG0004658	C	meloidogyne_hapla.PRJNA29083.WBPS14	transcript:MhA1_Contig915.frz3.gene18	mh_4		mh_4	C
OG0004659	C	meloidogyne_hapla.PRJNA29083.WBPS14	transcript:MhA1_Contig96.frz3.gene6	mh_3		mh_3	C
OG0004660	C	meloidogyne_hapla.PRJNA29083.WBPS14	transcript:MhA1_Contig2074.frz3.fgene2	mh_2B		mh_2B	C
OG0004662	C	meloidogyne_hapla.PRJNA29083.WBPS14	transcript:MhA1_Contig113.frz3.gene9	mh_4		mh_4	C
OG0004664	C	meloidogyne_hapla.PRJNA29083.WBPS14	transcript:MhA1_Contig137.frz3.gene6	mh_3		mh_3	C
OG0004665	C	meloidogyne_hapla.PRJNA29083.WBPS14	transcript:MhA1_Contig134.frz3.gene20	mh_6		mh_6	C
OG0004666	C	meloidogyne_hapla.PRJNA29083.WBPS14	transcript:MhA1_Contig133.frz3.gene25	mh_6		mh_6	C
OG0004667	C	meloidogyne_hapla.PRJNA29083.WBPS14	transcript:MhA1_Contig1194.frz3.fgene1	mh_MhA1_Contig1194		mh_MhA1_Contig1194	C
OG0004668	C	meloidogyne_hapla.PRJNA29083.WBPS14	transcript:MhA1_Contig194.frz3.fgene3	mh_MhA1_Contig194		mh_MhA1_Contig194	C
OG0004669	C	meloidogyne_hapla.PRJNA29083.WBPS14	transcript:MhA1_Contig306.frz3.gene13	mh_4		mh_4	C
OG0004670	C	meloidogyne_hapla.PRJNA29083.WBPS14	transcript:MhA1_Contig402.frz3.gene19	mh_1A		mh_1A	C
OG0004674	C	meloidogyne_hapla.PRJNA29083.WBPS14	transcript:MhA1_Contig134.frz3.gene7	mh_6		mh_6	C
OG0004675	C	meloidogyne_hapla.PRJNA29083.WBPS14	transcript:MhA1_Contig147.frz3.gene78	mh_6		mh_6	C
OG0004677	B	meloidogyne_hapla.PRJNA29083.WBPS14	transcript:MhA1_Contig779.frz3.gene3	mh_13A.17		mh_13A.17	B
OG0004680	C	meloidogyne_hapla.PRJNA29083.WBPS14	transcript:MhA1_Contig764.frz3.gene9	mh_10.12.18		mh_10.12.18	C
OG0004682	C	meloidogyne_hapla.PRJNA29083.WBPS14	transcript:MhA1_Contig1433.frz3.gene4	mh_MhA1_Contig1433		mh_MhA1_Contig1433	C
OG0004685	C	meloidogyne_hapla.PRJNA29083.WBPS14	transcript:MhA1_Contig1555.frz3.fgene3	mh_2B		mh_2B	C
OG0004686	C	meloidogyne_hapla.PRJNA29083.WBPS14	transcript:MhA1_Contig952.frz3.gene5	mh_16		mh_16	C
OG0004687	C	meloidogyne_hapla.PRJNA29083.WBPS14	transcript:MhA1_Contig1493.frz3.gene3	mh_16		mh_16	C
OG0004688	C	meloidogyne_hapla.PRJNA29083.WBPS14	transcript:MhA1_Contig82.frz3.gene8	mh_5		mh_5	C
OG0004689	C	meloidogyne_hapla.PRJNA29083.WBPS14	transcript:MhA1_Contig542.frz3.gene10	mh_4		mh_4	C
OG0004690	C	meloidogyne_hapla.PRJNA29083.WBPS14	transcript:MhA1_Contig116.frz3.gene8	mh_4		mh_4	C
OG0004691	C	meloidogyne_hapla.PRJNA29083.WBPS14	transcript:MhA1_Contig7.frz3.gene8	mh_15		mh_15	C
OG0004692	C	meloidogyne_hapla.PRJNA29083.WBPS14	transcript:MhA1_Contig914.frz3.gene7	mh_16		mh_16	C
OG0004693	C	meloidogyne_hapla.PRJNA29083.WBPS14	transcript:MhA1_Contig123.frz3.gene10	mh_13A.17		mh_13A.17	C
OG0004694	C	meloidogyne_hapla.PRJNA29083.WBPS14	transcript:MhA1_Contig113.frz3.gene22	mh_4		mh_4	C
OG0004695	C	meloidogyne_hapla.PRJNA29083.WBPS14	transcript:MhA1_Contig305.frz3.fgene1	mh_4		mh_4	C
OG0004698	N	meloidogyne_hapla.PRJNA29083.WBPS14	transcript:MhA1_Contig417.frz3.gene13	mh_2B		mh_2B	N
OG0004699	N	meloidogyne_hapla.PRJNA29083.WBPS14	transcript:MhA1_Contig213.frz3.gene63	mh_MhA1_Contig213		mh_MhA1_Contig213	N
OG0004700	N	meloidogyne_hapla.PRJNA29083.WBPS14	transcript:MhA1_Contig363.frz3.gene1	mh_MhA1_Contig363		mh_MhA1_Contig363	N
OG0004702	N	meloidogyne_hapla.PRJNA29083.WBPS14	transcript:MhA1_Contig2087.frz3.gene6	mh_2A		mh_2A	N
OG0004704	N	meloidogyne_hapla.PRJNA29083.WBPS14	transcript:MhA1_Contig25.frz3.gene31	mh_1B		mh_1B	N
OG0004706	N	meloidogyne_hapla.PRJNA29083.WBPS14	transcript:MhA1_Contig78.frz3.fgene7	mh_5		mh_5	N
OG0004707	C	meloidogyne_hapla.PRJNA29083.WBPS14	transcript:MhA1_Contig342.frz3.gene20	mh_3		mh_3	C
OG0004710	C	meloidogyne_hapla.PRJNA29083.WBPS14	transcript:MhA1_Contig915.frz3.fgene1	mh_4		mh_4	C
OG0004711	C	meloidogyne_hapla.PRJNA29083.WBPS14	transcript:MhA1_Contig115.frz3.gene12	mh_4		mh_4	C
OG0004712	C	meloidogyne_hapla.PRJNA29083.WBPS14	transcript:MhA1_Contig1055.frz3.gene7	mh_13A.17		mh_13A.17	C
OG0004713	C	meloidogyne_hapla.PRJNA29083.WBPS14	transcript:MhA1_Contig1264.frz3.gene3	mh_4		mh_4	C
OG0004715	C	meloidogyne_hapla.PRJNA29083.WBPS14	transcript:MhA1_Contig271.frz3.gene24	mh_5		mh_5	C
OG0004716	C	meloidogyne_hapla.PRJNA29083.WBPS14	transcript:MhA1_Contig648.frz3.gene12	mh_1A		mh_1A	C
OG0004717	C	meloidogyne_hapla.PRJNA29083.WBPS14	transcript:MhA1_Contig138.frz3.gene57	mh_3		mh_3	C
OG0004718	C	meloidogyne_hapla.PRJNA29083.WBPS14	transcript:MhA1_Contig1375.frz3.gene3	mh_8		mh_8	C
OG0004719	C	meloidogyne_hapla.PRJNA29083.WBPS14	transcript:MhA1_Contig1375.frz3.gene6	mh_8		mh_8	C
OG0004720	C	meloidogyne_hapla.PRJNA29083.WBPS14	transcript:MhA1_Contig42.frz3.gene13	mh_4		mh_4	C
OG0004721	C	meloidogyne_hapla.PRJNA29083.WBPS14	transcript:MhA1_Contig3364.frz3.gene1	mh_MhA1_Contig3364		mh_MhA1_Contig3364	C
OG0004722	C	meloidogyne_hapla.PRJNA29083.WBPS14	transcript:MhA1_Contig138.frz3.gene11	mh_3		mh_3	C
OG0004723	C	meloidogyne_hapla.PRJNA29083.WBPS14	transcript:MhA1_Contig306.frz3.gene7	mh_4		mh_4	C
OG0004724	C	meloidogyne_hapla.PRJNA29083.WBPS14	transcript:MhA1_Contig660.frz3.gene7	mh_MhA1_Contig660		mh_MhA1_Contig660	C
OG0004725	C	meloidogyne_hapla.PRJNA29083.WBPS14	transcript:MhA1_Contig44.frz3.gene5	mh_MhA1_Contig44		mh_MhA1_Contig44	C
OG0004727	N	meloidogyne_hapla.PRJNA29083.WBPS14	transcript:MhA1_Contig29.frz3.gene26	mh_1B		mh_1B	N
OG0004728	N	meloidogyne_hapla.PRJNA29083.WBPS14	transcript:MhA1_Contig29.frz3.gene22	mh_1B		mh_1B	N
OG0004733	N	meloidogyne_hapla.PRJNA29083.WBPS14	transcript:MhA1_Contig1761.frz3.gene4	mh_6		mh_6	N
OG0004734	C	meloidogyne_hapla.PRJNA29083.WBPS14	transcript:MhA1_Contig438.frz3.gene27	mh_16		mh_16	C
OG0004735	C	meloidogyne_hapla.PRJNA29083.WBPS14	transcript:MhA1_Contig993.frz3.gene5	mh_8		mh_8	C
OG0004737	C	meloidogyne_hapla.PRJNA29083.WBPS14	transcript:MhA1_Contig121.frz3.gene37	mh_11		mh_11	C
OG0004738	C	meloidogyne_hapla.PRJNA29083.WBPS14	transcript:MhA1_Contig389.frz3.gene14	mh_4		mh_4	C
OG0004739	C	meloidogyne_hapla.PRJNA29083.WBPS14	transcript:MhA1_Contig45.frz3.gene8	mh_4		mh_4	C
OG0004740	C	meloidogyne_hapla.PRJNA29083.WBPS14	transcript:MhA1_Contig179.frz3.gene24	mh_11		mh_11	C
OG0004741	C	meloidogyne_hapla.PRJNA29083.WBPS14	transcript:MhA1_Contig373.frz3.gene4	mh_10.12.18		mh_10.12.18	C
OG0004742	C	meloidogyne_hapla.PRJNA29083.WBPS14	transcript:MhA1_Contig1000.frz3.gene9	mh_2A		mh_2A	C
OG0004744	C	meloidogyne_hapla.PRJNA29083.WBPS14	transcript:MhA1_Contig1534.frz3.gene14	mh_1B		mh_1B	C
OG0004746	C	meloidogyne_hapla.PRJNA29083.WBPS14	transcript:MhA1_Contig277.frz3.gene31	mh_3		mh_3	C
OG0004747	C	meloidogyne_hapla.PRJNA29083.WBPS14	transcript:MhA1_Contig202.frz3.gene13	mh_MhA1_Contig202		mh_MhA1_Contig202	C
OG0004748	C	meloidogyne_hapla.PRJNA29083.WBPS14	transcript:MhA1_Contig515.frz3.gene28	mh_10.12.18		mh_10.12.18	C
OG0004749	C	meloidogyne_hapla.PRJNA29083.WBPS14	transcript:MhA1_Contig2031.frz3.gene5	mh_MhA1_Contig2031		mh_MhA1_Contig2031	C
OG0004750	C	meloidogyne_hapla.PRJNA29083.WBPS14	transcript:MhA1_Contig116.frz3.fgene6	mh_4		mh_4	C
OG0004752	C	meloidogyne_hapla.PRJNA29083.WBPS14	transcript:MhA1_Contig469.frz3.gene8	mh_13A.17		mh_13A.17	C
OG0004753	C	meloidogyne_hapla.PRJNA29083.WBPS14	transcript:MhA1_Contig540.frz3.gene15	mh_4		mh_4	C
OG0004754	C	meloidogyne_hapla.PRJNA29083.WBPS14	transcript:MhA1_Contig707.frz3.gene15	mh_MhA1_Contig707		mh_MhA1_Contig707	C
OG0004755	C	meloidogyne_hapla.PRJNA29083.WBPS14	transcript:MhA1_Contig45.frz3.gene23	mh_4		mh_4	C
OG0004757	C	meloidogyne_hapla.PRJNA29083.WBPS14	transcript:MhA1_Contig138.frz3.gene37	mh_3		mh_3	C
OG0004758	C	meloidogyne_hapla.PRJNA29083.WBPS14	transcript:MhA1_Contig45.frz3.gene12	mh_4		mh_4	C
OG0004760	C	meloidogyne_hapla.PRJNA29083.WBPS14	transcript:MhA1_Contig196.frz3.fgene1	mh_21		mh_21	C
OG0004771	N	meloidogyne_hapla.PRJNA29083.WBPS14	transcript:MhA1_Contig29.frz3.gene15	mh_1B		mh_1B	N
OG0004773	N	meloidogyne_hapla.PRJNA29083.WBPS14	transcript:MhA1_Contig952.frz3.gene19	mh_16		mh_16	N
OG0004775	N	meloidogyne_hapla.PRJNA29083.WBPS14	transcript:MhA1_Contig695.frz3.gene5	mh_MhA1_Contig695		mh_MhA1_Contig695	N
OG0004780	N	meloidogyne_hapla.PRJNA29083.WBPS14	transcript:MhA1_Contig478.frz3.gene1	mh_2A		mh_2A	N
OG0004781	N	meloidogyne_hapla.PRJNA29083.WBPS14	transcript:MhA1_Contig1.frz3.gene4	mh_MhA1_Contig1		mh_MhA1_Contig1	N
OG0004785	N	meloidogyne_hapla.PRJNA29083.WBPS14	transcript:MhA1_Contig88.frz3.gene70	mh_11		mh_11	N
OG0004787	N	meloidogyne_hapla.PRJNA29083.WBPS14	transcript:MhA1_Contig357.frz3.gene6	mh_14		mh_14	N
OG0004793	N	meloidogyne_hapla.PRJNA29083.WBPS14	transcript:MhA1_Contig271.frz3.gene15	mh_5		mh_5	N
OG0004794	N	meloidogyne_hapla.PRJNA29083.WBPS14	transcript:MhA1_Contig271.frz3.gene30	mh_5		mh_5	N
OG0004796	C	meloidogyne_hapla.PRJNA29083.WBPS14	transcript:MhA1_Contig349.frz3.gene14	mh_16		mh_16	C
OG0004798	C	meloidogyne_hapla.PRJNA29083.WBPS14	transcript:MhA1_Contig116.frz3.fgene3	mh_4		mh_4	C
OG0004800	C	meloidogyne_hapla.PRJNA29083.WBPS14	transcript:MhA1_Contig915.frz3.gene17	mh_4		mh_4	C
OG0004801	C	meloidogyne_hapla.PRJNA29083.WBPS14	transcript:MhA1_Contig239.frz3.gene35	mh_11		mh_11	C
OG0004802	C	meloidogyne_hapla.PRJNA29083.WBPS14	transcript:MhA1_Contig815.frz3.gene10	mh_21		mh_21	C
OG0004803	C	meloidogyne_hapla.PRJNA29083.WBPS14	transcript:MhA1_Contig2224.frz3.gene2	mh_3		mh_3	C
OG0004804	C	meloidogyne_hapla.PRJNA29083.WBPS14	transcript:MhA1_Contig1799.frz3.fgene1	mh_8		mh_8	C
OG0004809	C	meloidogyne_hapla.PRJNA29083.WBPS14	transcript:MhA1_Contig2705.frz3.gene2	mh_MhA1_Contig2705		mh_MhA1_Contig2705	C
OG0004810	C	meloidogyne_hapla.PRJNA29083.WBPS14	transcript:MhA1_Contig1289.frz3.gene5	mh_8		mh_8	C
OG0004811	C	meloidogyne_hapla.PRJNA29083.WBPS14	transcript:MhA1_Contig1289.frz3.gene7	mh_8		mh_8	C
OG0004813	C	meloidogyne_hapla.PRJNA29083.WBPS14	transcript:MhA1_Contig325.frz3.gene20	mh_MhA1_Contig325		mh_MhA1_Contig325	C
OG0004816	C	meloidogyne_hapla.PRJNA29083.WBPS14	transcript:MhA1_Contig45.frz3.gene6	mh_4		mh_4	C
OG0004819	N	meloidogyne_hapla.PRJNA29083.WBPS14	transcript:MhA1_Contig221.frz3.gene11	mh_MhA1_Contig221		mh_MhA1_Contig221	N
OG0004821	N	meloidogyne_hapla.PRJNA29083.WBPS14	transcript:MhA1_Contig194.frz3.gene8	mh_MhA1_Contig194		mh_MhA1_Contig194	N
OG0004825	N	meloidogyne_hapla.PRJNA29083.WBPS14	transcript:MhA1_Contig7.frz3.gene47	mh_15		mh_15	N
OG0004827	C	meloidogyne_hapla.PRJNA29083.WBPS14	transcript:MhA1_Contig953.frz3.gene14	mh_7		mh_7	C
OG0004828	C	meloidogyne_hapla.PRJNA29083.WBPS14	transcript:MhA1_Contig256.frz3.fgene3	mh_13A.17		mh_13A.17	C
OG0004830	C	meloidogyne_hapla.PRJNA29083.WBPS14	transcript:MhA1_Contig1149.frz3.gene8	mh_8		mh_8	C
OG0004831	C	meloidogyne_hapla.PRJNA29083.WBPS14	transcript:MhA1_Contig468.frz3.gene49	mh_13A.17		mh_13A.17	C
OG0004832	C	meloidogyne_hapla.PRJNA29083.WBPS14	transcript:MhA1_Contig730.frz3.gene5	mh_13A.17		mh_13A.17	C
OG0004833	C	meloidogyne_hapla.PRJNA29083.WBPS14	transcript:MhA1_Contig590.frz3.fgene5	mh_1B		mh_1B	C
OG0004835	C	meloidogyne_hapla.PRJNA29083.WBPS14	transcript:MhA1_Contig1055.frz3.gene4	mh_13A.17		mh_13A.17	C
OG0004836	C	meloidogyne_hapla.PRJNA29083.WBPS14	transcript:MhA1_Contig133.frz3.gene4	mh_6		mh_6	C
OG0004837	C	meloidogyne_hapla.PRJNA29083.WBPS14	transcript:MhA1_Contig133.frz3.gene5	mh_6		mh_6	C
OG0004838	C	meloidogyne_hapla.PRJNA29083.WBPS14	transcript:MhA1_Contig160.frz3.gene13	mh_6		mh_6	C
OG0004839	C	meloidogyne_hapla.PRJNA29083.WBPS14	transcript:MhA1_Contig134.frz3.gene16	mh_6		mh_6	C
OG0004840	C	meloidogyne_hapla.PRJNA29083.WBPS14	transcript:MhA1_Contig2078.frz3.fgene1	mh_3		mh_3	C
OG0004841	C	meloidogyne_hapla.PRJNA29083.WBPS14	transcript:MhA1_Contig387.frz3.gene4	mh_4		mh_4	C
OG0004843	C	meloidogyne_hapla.PRJNA29083.WBPS14	transcript:MhA1_Contig194.frz3.gene66	mh_MhA1_Contig194		mh_MhA1_Contig194	C
OG0004844	C	meloidogyne_hapla.PRJNA29083.WBPS14	transcript:MhA1_Contig2367.frz3.fgene1	mh_7		mh_7	C
OG0004846	C	meloidogyne_hapla.PRJNA29083.WBPS14	transcript:MhA1_Contig832.frz3.gene5	mh_MhA1_Contig832		mh_MhA1_Contig832	C
OG0004847	C	meloidogyne_hapla.PRJNA29083.WBPS14	transcript:MhA1_Contig1566.frz3.gene7	mh_5		mh_5	C
OG0004848	C	meloidogyne_hapla.PRJNA29083.WBPS14	transcript:MhA1_Contig707.frz3.gene6	mh_MhA1_Contig707		mh_MhA1_Contig707	C
OG0004851	C	meloidogyne_hapla.PRJNA29083.WBPS14	transcript:MhA1_Contig261.frz3.gene15	mh_2B		mh_2B	C
OG0004852	C	meloidogyne_hapla.PRJNA29083.WBPS14	transcript:MhA1_Contig1780.frz3.fgene1	mh_MhA1_Contig1780		mh_MhA1_Contig1780	C
OG0004853	C	meloidogyne_hapla.PRJNA29083.WBPS14	transcript:MhA1_Contig354.frz3.gene42	mh_3		mh_3	C
OG0004855	C	meloidogyne_hapla.PRJNA29083.WBPS14	transcript:MhA1_Contig147.frz3.gene40	mh_6		mh_6	C
OG0004856	C	meloidogyne_hapla.PRJNA29083.WBPS14	transcript:MhA1_Contig2164.frz3.fgene1	mh_MhA1_Contig2164		mh_MhA1_Contig2164	C
OG0004857	C	meloidogyne_hapla.PRJNA29083.WBPS14	transcript:MhA1_Contig130.frz3.gene56	mh_13A.17		mh_13A.17	C
OG0004859	C	meloidogyne_hapla.PRJNA29083.WBPS14	transcript:MhA1_Contig912.frz3.gene16	mh_16		mh_16	C
OG0004861	C	meloidogyne_hapla.PRJNA29083.WBPS14	transcript:MhA1_Contig1756.frz3.gene7	mh_MhA1_Contig1756		mh_MhA1_Contig1756	C
OG0004864	C	meloidogyne_hapla.PRJNA29083.WBPS14	transcript:MhA1_Contig812.frz3.gene3	mh_MhA1_Contig812		mh_MhA1_Contig812	C
OG0004866	C	meloidogyne_hapla.PRJNA29083.WBPS14	transcript:MhA1_Contig304.frz3.gene9	mh_4		mh_4	C
OG0004867	C	meloidogyne_hapla.PRJNA29083.WBPS14	transcript:MhA1_Contig260.frz3.gene3	mh_2B		mh_2B	C
OG0004868	C	meloidogyne_hapla.PRJNA29083.WBPS14	transcript:MhA1_Contig630.frz3.gene27	mh_1A		mh_1A	C
OG0004869	C	meloidogyne_hapla.PRJNA29083.WBPS14	transcript:MhA1_Contig1473.frz3.gene1	mh_3		mh_3	C
OG0004870	C	meloidogyne_hapla.PRJNA29083.WBPS14	transcript:MhA1_Contig42.frz3.gene22	mh_4		mh_4	C
OG0004873	C	meloidogyne_hapla.PRJNA29083.WBPS14	transcript:MhA1_Contig113.frz3.gene2	mh_4		mh_4	C
OG0004874	C	meloidogyne_hapla.PRJNA29083.WBPS14	transcript:MhA1_Contig1477.frz3.gene8	mh_10.12.18		mh_10.12.18	C
OG0004877	A	meloidogyne_hapla.PRJNA29083.WBPS14	transcript:MhA1_Contig590.frz3.gene7	mh_1B		mh_1B	A
OG0004878	A	meloidogyne_hapla.PRJNA29083.WBPS14	transcript:MhA1_Contig2250.frz3.gene3	mh_MhA1_Contig2250		mh_MhA1_Contig2250	A
OG0004879	A	meloidogyne_hapla.PRJNA29083.WBPS14	transcript:MhA1_Contig579.frz3.gene4	mh_13A.17		mh_13A.17	A
OG0004880	A	meloidogyne_hapla.PRJNA29083.WBPS14	transcript:MhA1_Contig781.frz3.gene20	mh_13A.17		mh_13A.17	A
OG0004881	A	meloidogyne_hapla.PRJNA29083.WBPS14	transcript:MhA1_Contig1121.frz3.gene14	mh_MhA1_Contig1121		mh_MhA1_Contig1121	A
OG0004882	A	meloidogyne_hapla.PRJNA29083.WBPS14	transcript:MhA1_Contig695.frz3.fgene1	mh_MhA1_Contig695		mh_MhA1_Contig695	A
OG0004883	A	meloidogyne_hapla.PRJNA29083.WBPS14	transcript:MhA1_Contig695.frz3.gene13	mh_MhA1_Contig695		mh_MhA1_Contig695	A
OG0004884	A	meloidogyne_hapla.PRJNA29083.WBPS14	transcript:MhA1_Contig91.frz3.gene8	mh_13A.17		mh_13A.17	A
OG0004885	A	meloidogyne_hapla.PRJNA29083.WBPS14	transcript:MhA1_Contig788.frz3.gene3	mh_MhA1_Contig788		mh_MhA1_Contig788	A
OG0004886	A	meloidogyne_hapla.PRJNA29083.WBPS14	transcript:MhA1_Contig1761.frz3.gene11	mh_6		mh_6	A
OG0004887	A	meloidogyne_hapla.PRJNA29083.WBPS14	transcript:MhA1_Contig108.frz3.gene7	mh_13B		mh_13B	A
OG0004888	A	meloidogyne_hapla.PRJNA29083.WBPS14	transcript:MhA1_Contig74.frz3.fgene1	mh_1B		mh_1B	A
OG0004891	A	meloidogyne_hapla.PRJNA29083.WBPS14	transcript:MhA1_Contig3017.frz3.gene1	mh_MhA1_Contig3017		mh_MhA1_Contig3017	A
OG0004893	A	meloidogyne_hapla.PRJNA29083.WBPS14	transcript:MhA1_Contig74.frz3.gene17	mh_1B		mh_1B	A
OG0004894	A	meloidogyne_hapla.PRJNA29083.WBPS14	transcript:MhA1_Contig1896.frz3.gene3	mh_MhA1_Contig1896		mh_MhA1_Contig1896	A
OG0004895	A	meloidogyne_hapla.PRJNA29083.WBPS14	transcript:MhA1_Contig1500.frz3.gene3	mh_13A.17		mh_13A.17	A
OG0004896	A	meloidogyne_hapla.PRJNA29083.WBPS14	transcript:MhA1_Contig1774.frz3.gene7	mh_1A		mh_1A	A
OG0004898	A	meloidogyne_hapla.PRJNA29083.WBPS14	transcript:MhA1_Contig718.frz3.gene4	mh_1A		mh_1A	A
OG0004900	A	meloidogyne_hapla.PRJNA29083.WBPS14	transcript:MhA1_Contig580.frz3.gene15	mh_MhA1_Contig580		mh_MhA1_Contig580	A
OG0004901	A	meloidogyne_hapla.PRJNA29083.WBPS14	transcript:MhA1_Contig130.frz3.gene12	mh_13A.17		mh_13A.17	A
OG0004902	A	meloidogyne_hapla.PRJNA29083.WBPS14	transcript:MhA1_Contig1544.frz3.gene5	mh_MhA1_Contig1544		mh_MhA1_Contig1544	A
OG0004903	A	meloidogyne_hapla.PRJNA29083.WBPS14	transcript:MhA1_Contig1466.frz3.gene4	mh_MhA1_Contig1466		mh_MhA1_Contig1466	A
OG0004904	A	meloidogyne_hapla.PRJNA29083.WBPS14	transcript:MhA1_Contig697.frz3.gene16	mh_1B		mh_1B	A
OG0004908	A	meloidogyne_hapla.PRJNA29083.WBPS14	transcript:MhA1_Contig918.frz3.fgene1	mh_7		mh_7	A
OG0004910	A	meloidogyne_hapla.PRJNA29083.WBPS14	transcript:MhA1_Contig18.frz3.gene25	mh_2A		mh_2A	A
OG0004911	A	meloidogyne_hapla.PRJNA29083.WBPS14	transcript:MhA1_Contig456.frz3.fgene3	mh_4		mh_4	A
OG0004912	A	meloidogyne_hapla.PRJNA29083.WBPS14	transcript:MhA1_Contig353.frz3.gene36	mh_13B		mh_13B	A
OG0004914	A	meloidogyne_hapla.PRJNA29083.WBPS14	transcript:MhA1_Contig436.frz3.gene14	mh_13B		mh_13B	A
OG0004916	A	meloidogyne_hapla.PRJNA29083.WBPS14	transcript:MhA1_Contig484.frz3.fgene9	mh_1A		mh_1A	A
OG0004917	A	meloidogyne_hapla.PRJNA29083.WBPS14	transcript:MhA1_Contig659.frz3.gene12	mh_4		mh_4	A
OG0004920	A	meloidogyne_hapla.PRJNA29083.WBPS14	transcript:MhA1_Contig1250.frz3.gene14	mh_MhA1_Contig1250		mh_MhA1_Contig1250	A
OG0004921	A	meloidogyne_hapla.PRJNA29083.WBPS14	transcript:MhA1_Contig1250.frz3.gene13	mh_MhA1_Contig1250		mh_MhA1_Contig1250	A
OG0004922	A	meloidogyne_hapla.PRJNA29083.WBPS14	transcript:MhA1_Contig992.frz3.fgene1	mh_MhA1_Contig992		mh_MhA1_Contig992	A
OG0004923	A	meloidogyne_hapla.PRJNA29083.WBPS14	transcript:MhA1_Contig887.frz3.gene3	mh_13A.17		mh_13A.17	A
OG0004926	A	meloidogyne_hapla.PRJNA29083.WBPS14	transcript:MhA1_Contig693.frz3.gene4	mh_MhA1_Contig693		mh_MhA1_Contig693	A
OG0004928	A	meloidogyne_hapla.PRJNA29083.WBPS14	transcript:MhA1_Contig121.frz3.gene85	mh_11		mh_11	A
OG0004929	A	meloidogyne_hapla.PRJNA29083.WBPS14	transcript:MhA1_Contig1067.frz3.gene14	mh_MhA1_Contig1067		mh_MhA1_Contig1067	A
OG0004930	A	meloidogyne_hapla.PRJNA29083.WBPS14	transcript:MhA1_Contig1165.frz3.gene8	mh_13A.17		mh_13A.17	A
OG0004932	A	meloidogyne_hapla.PRJNA29083.WBPS14	transcript:MhA1_Contig164.frz3.gene1	mh_MhA1_Contig164		mh_MhA1_Contig164	A
OG0004936	A	meloidogyne_hapla.PRJNA29083.WBPS14	transcript:MhA1_Contig599.frz3.gene2	mh_13A.17		mh_13A.17	A
OG0004939	A	meloidogyne_hapla.PRJNA29083.WBPS14	transcript:MhA1_Contig94.frz3.gene6	mh_13A.17		mh_13A.17	A
OG0004941	A	meloidogyne_hapla.PRJNA29083.WBPS14	transcript:MhA1_Contig1076.frz3.gene2	mh_MhA1_Contig1076		mh_MhA1_Contig1076	A
OG0004942	A	meloidogyne_hapla.PRJNA29083.WBPS14	transcript:MhA1_Contig418.frz3.gene35	mh_2B		mh_2B	A
OG0004944	A	meloidogyne_hapla.PRJNA29083.WBPS14	transcript:MhA1_Contig684.frz3.gene3	mh_10.12.18		mh_10.12.18	A
OG0004947	A	meloidogyne_hapla.PRJNA29083.WBPS14	transcript:MhA1_Contig30.frz3.gene28	mh_1B		mh_1B	A
OG0004948	A	meloidogyne_hapla.PRJNA29083.WBPS14	transcript:MhA1_Contig163.frz3.gene22	mh_13A.17		mh_13A.17	A
OG0004951	A	meloidogyne_hapla.PRJNA29083.WBPS14	transcript:MhA1_Contig91.frz3.gene14	mh_13A.17		mh_13A.17	A
OG0004952	A	meloidogyne_hapla.PRJNA29083.WBPS14	transcript:MhA1_Contig32.frz3.gene7	mh_MhA1_Contig32		mh_MhA1_Contig32	A
OG0004953	A	meloidogyne_hapla.PRJNA29083.WBPS14	transcript:MhA1_Contig1137.frz3.fgene1	mh_MhA1_Contig1137		mh_MhA1_Contig1137	A
OG0004955	A	meloidogyne_hapla.PRJNA29083.WBPS14	transcript:MhA1_Contig1237.frz3.gene9	mh_21		mh_21	A
OG0004956	A	meloidogyne_hapla.PRJNA29083.WBPS14	transcript:MhA1_Contig932.frz3.fgene1	mh_MhA1_Contig932		mh_MhA1_Contig932	A
OG0004957	A	meloidogyne_hapla.PRJNA29083.WBPS14	transcript:MhA1_Contig932.frz3.gene1	mh_MhA1_Contig932		mh_MhA1_Contig932	A
OG0004959	A	meloidogyne_hapla.PRJNA29083.WBPS14	transcript:MhA1_Contig88.frz3.gene116	mh_11		mh_11	A
OG0004960	A	meloidogyne_hapla.PRJNA29083.WBPS14	transcript:MhA1_Contig1960.frz3.fgene1	mh_MhA1_Contig1960		mh_MhA1_Contig1960	A
OG0004961	A	meloidogyne_hapla.PRJNA29083.WBPS14	transcript:MhA1_Contig1282.frz3.gene8	mh_MhA1_Contig1282		mh_MhA1_Contig1282	A
OG0004964	A	meloidogyne_hapla.PRJNA29083.WBPS14	transcript:MhA1_Contig1890.frz3.gene11	mh_MhA1_Contig1890		mh_MhA1_Contig1890	A
OG0004965	A	meloidogyne_hapla.PRJNA29083.WBPS14	transcript:MhA1_Contig735.frz3.gene14	mh_11		mh_11	A
OG0004966	A	meloidogyne_hapla.PRJNA29083.WBPS14	transcript:MhA1_Contig1246.frz3.gene13	mh_5		mh_5	A
OG0004967	A	meloidogyne_hapla.PRJNA29083.WBPS14	transcript:MhA1_Contig588.frz3.gene4	mh_1B		mh_1B	A
OG0004968	A	meloidogyne_hapla.PRJNA29083.WBPS14	transcript:MhA1_Contig590.frz3.fgene1	mh_1B		mh_1B	A
OG0004969	A	meloidogyne_hapla.PRJNA29083.WBPS14	transcript:MhA1_Contig590.frz3.gene9	mh_1B		mh_1B	A
OG0004970	A	meloidogyne_hapla.PRJNA29083.WBPS14	transcript:MhA1_Contig693.frz3.gene7	mh_MhA1_Contig693		mh_MhA1_Contig693	A
OG0004971	A	meloidogyne_hapla.PRJNA29083.WBPS14	transcript:MhA1_Contig334.frz3.gene36	mh_7		mh_7	A
OG0004972	A	meloidogyne_hapla.PRJNA29083.WBPS14	transcript:MhA1_Contig91.frz3.fgene2	mh_13A.17		mh_13A.17	A
OG0004973	A	meloidogyne_hapla.PRJNA29083.WBPS14	transcript:MhA1_Contig488.frz3.gene7	mh_1A		mh_1A	A
OG0004974	A	meloidogyne_hapla.PRJNA29083.WBPS14	transcript:MhA1_Contig333.frz3.gene26	mh_13A.17		mh_13A.17	A
OG0004976	A	meloidogyne_hapla.PRJNA29083.WBPS14	transcript:MhA1_Contig26.frz3.gene18	mh_1B		mh_1B	A
OG0004977	A	meloidogyne_hapla.PRJNA29083.WBPS14	transcript:MhA1_Contig803.frz3.gene4	mh_16		mh_16	A
OG0004978	A	meloidogyne_hapla.PRJNA29083.WBPS14	transcript:MhA1_Contig74.frz3.gene10	mh_1B		mh_1B	A
OG0004979	A	meloidogyne_hapla.PRJNA29083.WBPS14	transcript:MhA1_Contig2048.frz3.fgene2	mh_14		mh_14	A
OG0004980	A	meloidogyne_hapla.PRJNA29083.WBPS14	transcript:MhA1_Contig214.frz3.gene6	mh_MhA1_Contig214		mh_MhA1_Contig214	A
OG0004981	A	meloidogyne_hapla.PRJNA29083.WBPS14	transcript:MhA1_Contig1748.frz3.gene11	mh_1A		mh_1A	A
OG0004983	A	meloidogyne_hapla.PRJNA29083.WBPS14	transcript:MhA1_Contig456.frz3.gene7	mh_4		mh_4	A
OG0004985	A	meloidogyne_hapla.PRJNA29083.WBPS14	transcript:MhA1_Contig123.frz3.fgene4	mh_13A.17		mh_13A.17	A
OG0004986	A	meloidogyne_hapla.PRJNA29083.WBPS14	transcript:MhA1_Contig811.frz3.fgene2	mh_13A.17		mh_13A.17	A
OG0004988	A	meloidogyne_hapla.PRJNA29083.WBPS14	transcript:MhA1_Contig885.frz3.fgene1	mh_MhA1_Contig885		mh_MhA1_Contig885	A
OG0004992	A	meloidogyne_hapla.PRJNA29083.WBPS14	transcript:MhA1_Contig596.frz3.gene13	mh_MhA1_Contig596		mh_MhA1_Contig596	A
OG0004995	A	meloidogyne_hapla.PRJNA29083.WBPS14	transcript:MhA1_Contig849.frz3.gene6	mh_13A.17		mh_13A.17	A
OG0004996	A	meloidogyne_hapla.PRJNA29083.WBPS14	transcript:MhA1_Contig849.frz3.fgene2	mh_13A.17		mh_13A.17	A
OG0004997	A	meloidogyne_hapla.PRJNA29083.WBPS14	transcript:MhA1_Contig289.frz3.gene5	mh_MhA1_Contig289		mh_MhA1_Contig289	A
OG0005001	A	meloidogyne_hapla.PRJNA29083.WBPS14	transcript:MhA1_Contig850.frz3.gene4	mh_MhA1_Contig850		mh_MhA1_Contig850	A
OG0005002	A	meloidogyne_hapla.PRJNA29083.WBPS14	transcript:MhA1_Contig1189.frz3.gene1	mh_2A		mh_2A	A
OG0005005	A	meloidogyne_hapla.PRJNA29083.WBPS14	transcript:MhA1_Contig953.frz3.gene8	mh_7		mh_7	A
OG0005007	A	meloidogyne_hapla.PRJNA29083.WBPS14	transcript:MhA1_Contig29.frz3.gene19	mh_1B		mh_1B	A
OG0005009	A	meloidogyne_hapla.PRJNA29083.WBPS14	transcript:MhA1_Contig1514.frz3.fgene2	mh_13A.17		mh_13A.17	A
OG0005010	A	meloidogyne_hapla.PRJNA29083.WBPS14	transcript:MhA1_Contig1748.frz3.fgene1	mh_1A		mh_1A	A
OG0005012	A	meloidogyne_hapla.PRJNA29083.WBPS14	transcript:MhA1_Contig309.frz3.fgene6	mh_16		mh_16	A
OG0005013	A	meloidogyne_hapla.PRJNA29083.WBPS14	transcript:MhA1_Contig1090.frz3.gene2	mh_MhA1_Contig1090		mh_MhA1_Contig1090	A
OG0005014	A	meloidogyne_hapla.PRJNA29083.WBPS14	transcript:MhA1_Contig402.frz3.gene6	mh_1A		mh_1A	A
OG0005016	A	meloidogyne_hapla.PRJNA29083.WBPS14	transcript:MhA1_Contig770.frz3.gene8	mh_13A.17		mh_13A.17	A
OG0005017	A	meloidogyne_hapla.PRJNA29083.WBPS14	transcript:MhA1_Contig2442.frz3.gene6	mh_MhA1_Contig2442		mh_MhA1_Contig2442	A
OG0005018	A	meloidogyne_hapla.PRJNA29083.WBPS14	transcript:MhA1_Contig2442.frz3.gene4	mh_MhA1_Contig2442		mh_MhA1_Contig2442	A
OG0005019	A	meloidogyne_hapla.PRJNA29083.WBPS14	transcript:MhA1_Contig647.frz3.gene12	mh_1A		mh_1A	A
OG0005020	A	meloidogyne_hapla.PRJNA29083.WBPS14	transcript:MhA1_Contig1697.frz3.gene6	mh_MhA1_Contig1697		mh_MhA1_Contig1697	A
OG0005021	A	meloidogyne_hapla.PRJNA29083.WBPS14	transcript:MhA1_Contig194.frz3.gene13	mh_MhA1_Contig194		mh_MhA1_Contig194	A
OG0005022	A	meloidogyne_hapla.PRJNA29083.WBPS14	transcript:MhA1_Contig1467.frz3.gene1	mh_10.12.18		mh_10.12.18	A
OG0005023	A	meloidogyne_hapla.PRJNA29083.WBPS14	transcript:MhA1_Contig783.frz3.gene11	mh_4		mh_4	A
OG0005025	A	meloidogyne_hapla.PRJNA29083.WBPS14	transcript:MhA1_Contig118.frz3.gene45	mh_16		mh_16	A
OG0005026	A	meloidogyne_hapla.PRJNA29083.WBPS14	transcript:MhA1_Contig1514.frz3.gene8	mh_13A.17		mh_13A.17	A
OG0005027	C	meloidogyne_hapla.PRJNA29083.WBPS14	transcript:MhA1_Contig609.frz3.gene3	mh_7		mh_7	C
OG0005028	C	meloidogyne_hapla.PRJNA29083.WBPS14	transcript:MhA1_Contig88.frz3.gene113	mh_11		mh_11	C
OG0005029	C	meloidogyne_hapla.PRJNA29083.WBPS14	transcript:MhA1_Contig91.frz3.gene39	mh_13A.17		mh_13A.17	C
OG0005030	C	meloidogyne_hapla.PRJNA29083.WBPS14	transcript:MhA1_Contig468.frz3.gene41	mh_13A.17		mh_13A.17	C
OG0005031	C	meloidogyne_hapla.PRJNA29083.WBPS14	transcript:MhA1_Contig737.frz3.gene23	mh_13A.17		mh_13A.17	C
OG0005032	C	meloidogyne_hapla.PRJNA29083.WBPS14	transcript:MhA1_Contig1095.frz3.fgene3	mh_5		mh_5	C
OG0005033	C	meloidogyne_hapla.PRJNA29083.WBPS14	transcript:MhA1_Contig1055.frz3.fgene3	mh_13A.17		mh_13A.17	C
OG0005034	C	meloidogyne_hapla.PRJNA29083.WBPS14	transcript:MhA1_Contig1055.frz3.fgene1	mh_13A.17		mh_13A.17	C
OG0005036	C	meloidogyne_hapla.PRJNA29083.WBPS14	transcript:MhA1_Contig133.frz3.gene6	mh_6		mh_6	C
OG0005038	A	meloidogyne_hapla.PRJNA29083.WBPS14	transcript:MhA1_Contig508.frz3.fgene1	mh_20		mh_20	A
OG0005039	A	meloidogyne_hapla.PRJNA29083.WBPS14	transcript:MhA1_Contig95.frz3.gene2	mh_13A.17		mh_13A.17	A
OG0005042	A	meloidogyne_hapla.PRJNA29083.WBPS14	transcript:MhA1_Contig484.frz3.gene59	mh_1A		mh_1A	A
OG0005044	A	meloidogyne_hapla.PRJNA29083.WBPS14	transcript:MhA1_Contig931.frz3.fgene1	mh_MhA1_Contig931		mh_MhA1_Contig931	A
OG0005046	A	meloidogyne_hapla.PRJNA29083.WBPS14	transcript:MhA1_Contig187.frz3.gene6	mh_MhA1_Contig187		mh_MhA1_Contig187	A
OG0005048	A	meloidogyne_hapla.PRJNA29083.WBPS14	transcript:MhA1_Contig131.frz3.gene7	mh_MhA1_Contig131		mh_MhA1_Contig131	A
OG0005049	A	meloidogyne_hapla.PRJNA29083.WBPS14	transcript:MhA1_Contig0.frz3.gene44	mh_15		mh_15	A
OG0005050	A	meloidogyne_hapla.PRJNA29083.WBPS14	transcript:MhA1_Contig228.frz3.gene10	mh_10.12.18		mh_10.12.18	A
OG0005051	A	meloidogyne_hapla.PRJNA29083.WBPS14	transcript:MhA1_Contig1189.frz3.fgene4	mh_2A		mh_2A	A
OG0005052	A	meloidogyne_hapla.PRJNA29083.WBPS14	transcript:MhA1_Contig168.frz3.gene52	mh_1A		mh_1A	A
OG0005053	A	meloidogyne_hapla.PRJNA29083.WBPS14	transcript:MhA1_Contig898.frz3.gene7	mh_1B		mh_1B	A
OG0005054	A	meloidogyne_hapla.PRJNA29083.WBPS14	transcript:MhA1_Contig484.frz3.fgene11	mh_1A		mh_1A	A
OG0005055	A	meloidogyne_hapla.PRJNA29083.WBPS14	transcript:MhA1_Contig1135.frz3.gene1	mh_1A		mh_1A	A
OG0005056	A	meloidogyne_hapla.PRJNA29083.WBPS14	transcript:MhA1_Contig456.frz3.gene4	mh_4		mh_4	A
OG0005057	A	meloidogyne_hapla.PRJNA29083.WBPS14	transcript:MhA1_Contig29.frz3.gene20	mh_1B		mh_1B	A
OG0005058	A	meloidogyne_hapla.PRJNA29083.WBPS14	transcript:MhA1_Contig684.frz3.gene6	mh_10.12.18		mh_10.12.18	A
OG0005059	A	meloidogyne_hapla.PRJNA29083.WBPS14	transcript:MhA1_Contig697.frz3.gene20	mh_1B		mh_1B	A
OG0005060	A	meloidogyne_hapla.PRJNA29083.WBPS14	transcript:MhA1_Contig1250.frz3.gene9	mh_MhA1_Contig1250		mh_MhA1_Contig1250	A
OG0005061	A	meloidogyne_hapla.PRJNA29083.WBPS14	transcript:MhA1_Contig1322.frz3.gene9	mh_2B		mh_2B	A
OG0005062	A	meloidogyne_hapla.PRJNA29083.WBPS14	transcript:MhA1_Contig898.frz3.gene6	mh_1B		mh_1B	A
OG0005063	A	meloidogyne_hapla.PRJNA29083.WBPS14	transcript:MhA1_Contig460.frz3.gene4	mh_MhA1_Contig460		mh_MhA1_Contig460	A
OG0005064	A	meloidogyne_hapla.PRJNA29083.WBPS14	transcript:MhA1_Contig1913.frz3.gene4	mh_MhA1_Contig1913		mh_MhA1_Contig1913	A
OG0005065	A	meloidogyne_hapla.PRJNA29083.WBPS14	transcript:MhA1_Contig795.frz3.gene8	mh_MhA1_Contig795		mh_MhA1_Contig795	A
OG0005066	A	meloidogyne_hapla.PRJNA29083.WBPS14	transcript:MhA1_Contig338.frz3.gene17	mh_2B		mh_2B	A
OG0005067	A	meloidogyne_hapla.PRJNA29083.WBPS14	transcript:MhA1_Contig781.frz3.fgene1	mh_13A.17		mh_13A.17	A
OG0005068	A	meloidogyne_hapla.PRJNA29083.WBPS14	transcript:MhA1_Contig26.frz3.gene8	mh_1B		mh_1B	A
OG0005070	A	meloidogyne_hapla.PRJNA29083.WBPS14	transcript:MhA1_Contig252.frz3.gene18	mh_2B		mh_2B	A
OG0005071	A	meloidogyne_hapla.PRJNA29083.WBPS14	transcript:MhA1_Contig1440.frz3.gene4	mh_1B		mh_1B	A
OG0005072	A	meloidogyne_hapla.PRJNA29083.WBPS14	transcript:MhA1_Contig1607.frz3.gene3	mh_MhA1_Contig1607		mh_MhA1_Contig1607	A
OG0005073	A	meloidogyne_hapla.PRJNA29083.WBPS14	transcript:MhA1_Contig1493.frz3.gene12	mh_16		mh_16	A
OG0005074	A	meloidogyne_hapla.PRJNA29083.WBPS14	transcript:MhA1_Contig1400.frz3.gene9	mh_13A.17		mh_13A.17	A
OG0005076	A	meloidogyne_hapla.PRJNA29083.WBPS14	transcript:MhA1_Contig595.frz3.gene6	mh_1B		mh_1B	A
OG0005077	A	meloidogyne_hapla.PRJNA29083.WBPS14	transcript:MhA1_Contig2440.frz3.gene9	mh_MhA1_Contig2440		mh_MhA1_Contig2440	A
OG0005078	A	meloidogyne_hapla.PRJNA29083.WBPS14	transcript:MhA1_Contig400.frz3.gene15	mh_1A		mh_1A	A
OG0005080	A	meloidogyne_hapla.PRJNA29083.WBPS14	transcript:MhA1_Contig596.frz3.gene5	mh_MhA1_Contig596		mh_MhA1_Contig596	A
OG0005083	A	meloidogyne_hapla.PRJNA29083.WBPS14	transcript:MhA1_Contig934.frz3.gene8	mh_13A.17		mh_13A.17	A
OG0005084	A	meloidogyne_hapla.PRJNA29083.WBPS14	transcript:MhA1_Contig512.frz3.gene5	mh_5		mh_5	A
OG0005085	A	meloidogyne_hapla.PRJNA29083.WBPS14	transcript:MhA1_Contig402.frz3.fgene1	mh_1A		mh_1A	A
OG0005087	A	meloidogyne_hapla.PRJNA29083.WBPS14	transcript:MhA1_Contig123.frz3.gene100	mh_13A.17		mh_13A.17	A
OG0005088	A	meloidogyne_hapla.PRJNA29083.WBPS14	transcript:MhA1_Contig73.frz3.fgene1	mh_1B		mh_1B	A
OG0005089	A	meloidogyne_hapla.PRJNA29083.WBPS14	transcript:MhA1_Contig73.frz3.fgene2	mh_1B		mh_1B	A
OG0005091	C	meloidogyne_hapla.PRJNA29083.WBPS14	transcript:MhA1_Contig596.frz3.gene22	mh_MhA1_Contig596		mh_MhA1_Contig596	C
OG0005092	C	meloidogyne_hapla.PRJNA29083.WBPS14	transcript:MhA1_Contig147.frz3.gene60	mh_6		mh_6	C
OG0005093	C	meloidogyne_hapla.PRJNA29083.WBPS14	transcript:MhA1_Contig1986.frz3.gene6	mh_21		mh_21	C
OG0005094	C	meloidogyne_hapla.PRJNA29083.WBPS14	transcript:MhA1_Contig1390.frz3.gene7	mh_MhA1_Contig1390		mh_MhA1_Contig1390	C
OG0005096	C	meloidogyne_hapla.PRJNA29083.WBPS14	transcript:MhA1_Contig151.frz3.gene22	mh_21		mh_21	C
OG0005097	A	meloidogyne_hapla.PRJNA29083.WBPS14	transcript:MhA1_Contig492.frz3.gene6	mh_4		mh_4	A
OG0005098	A	meloidogyne_hapla.PRJNA29083.WBPS14	transcript:MhA1_Contig334.frz3.gene19	mh_7		mh_7	A
OG0005101	N	meloidogyne_hapla.PRJNA29083.WBPS14	transcript:MhA1_Contig239.frz3.gene9	mh_11		mh_11	N
OG0005102	N	meloidogyne_hapla.PRJNA29083.WBPS14	transcript:MhA1_Contig335.frz3.gene13	mh_7		mh_7	N
OG0005109	N	meloidogyne_hapla.PRJNA29083.WBPS14	transcript:MhA1_Contig271.frz3.gene17	mh_5		mh_5	N
OG0005113	N	meloidogyne_hapla.PRJNA29083.WBPS14	transcript:MhA1_Contig88.frz3.gene126	mh_11		mh_11	N
OG0005114	C	meloidogyne_hapla.PRJNA29083.WBPS14	transcript:MhA1_Contig544.frz3.fgene1	mh_MhA1_Contig544		mh_MhA1_Contig544	C
OG0005116	C	meloidogyne_hapla.PRJNA29083.WBPS14	transcript:MhA1_Contig468.frz3.gene38	mh_13A.17		mh_13A.17	C
OG0005117	C	meloidogyne_hapla.PRJNA29083.WBPS14	transcript:MhA1_Contig132.frz3.gene21	mh_13A.17		mh_13A.17	C
OG0005118	C	meloidogyne_hapla.PRJNA29083.WBPS14	transcript:MhA1_Contig481.frz3.fgene2	mh_2A		mh_2A	C
OG0005119	C	meloidogyne_hapla.PRJNA29083.WBPS14	transcript:MhA1_Contig1605.frz3.gene1	mh_MhA1_Contig1605		mh_MhA1_Contig1605	C
OG0005121	C	meloidogyne_hapla.PRJNA29083.WBPS14	transcript:MhA1_Contig385.frz3.fgene2	mh_10.12.18		mh_10.12.18	C
OG0005123	C	meloidogyne_hapla.PRJNA29083.WBPS14	transcript:MhA1_Contig46.frz3.gene11	mh_4		mh_4	C
OG0005125	C	meloidogyne_hapla.PRJNA29083.WBPS14	transcript:MhA1_Contig2493.frz3.gene5	mh_MhA1_Contig2493		mh_MhA1_Contig2493	C
OG0005126	C	meloidogyne_hapla.PRJNA29083.WBPS14	transcript:MhA1_Contig46.frz3.gene9	mh_4		mh_4	C
OG0005127	C	meloidogyne_hapla.PRJNA29083.WBPS14	transcript:MhA1_Contig121.frz3.gene40	mh_11		mh_11	C
OG0005129	C	meloidogyne_hapla.PRJNA29083.WBPS14	transcript:MhA1_Contig0.frz3.fgene5	mh_15		mh_15	C
OG0005130	C	meloidogyne_hapla.PRJNA29083.WBPS14	transcript:MhA1_Contig541.frz3.gene4	mh_4		mh_4	C
OG0005131	C	meloidogyne_hapla.PRJNA29083.WBPS14	transcript:MhA1_Contig1479.frz3.gene10	mh_3		mh_3	C
OG0005132	C	meloidogyne_hapla.PRJNA29083.WBPS14	transcript:MhA1_Contig990.frz3.gene5	mh_1A		mh_1A	C
OG0005133	C	meloidogyne_hapla.PRJNA29083.WBPS14	transcript:MhA1_Contig133.frz3.gene29	mh_6		mh_6	C
OG0005135	C	meloidogyne_hapla.PRJNA29083.WBPS14	transcript:MhA1_Contig1440.frz3.gene14	mh_1B		mh_1B	C
OG0005136	C	meloidogyne_hapla.PRJNA29083.WBPS14	transcript:MhA1_Contig42.frz3.gene7	mh_4		mh_4	C
OG0005138	C	meloidogyne_hapla.PRJNA29083.WBPS14	transcript:MhA1_Contig1263.frz3.gene2	mh_4		mh_4	C
OG0005139	C	meloidogyne_hapla.PRJNA29083.WBPS14	transcript:MhA1_Contig46.frz3.gene7	mh_4		mh_4	C
OG0005140	C	meloidogyne_hapla.PRJNA29083.WBPS14	transcript:MhA1_Contig722.frz3.gene2	mh_11		mh_11	C
OG0005142	C	meloidogyne_hapla.PRJNA29083.WBPS14	transcript:MhA1_Contig1992.frz3.gene5	mh_3		mh_3	C
OG0005144	C	meloidogyne_hapla.PRJNA29083.WBPS14	transcript:MhA1_Contig630.frz3.gene21	mh_1A		mh_1A	C
OG0005145	A	meloidogyne_hapla.PRJNA29083.WBPS14	transcript:MhA1_Contig932.frz3.gene8	mh_MhA1_Contig932		mh_MhA1_Contig932	A
OG0005146	A	meloidogyne_hapla.PRJNA29083.WBPS14	transcript:MhA1_Contig484.frz3.fgene12	mh_1A		mh_1A	A
OG0005148	A	meloidogyne_hapla.PRJNA29083.WBPS14	transcript:MhA1_Contig2102.frz3.gene1	mh_13A.17		mh_13A.17	A
OG0005153	A	meloidogyne_hapla.PRJNA29083.WBPS14	transcript:MhA1_Contig588.frz3.gene1	mh_1B		mh_1B	A
OG0005154	A	meloidogyne_hapla.PRJNA29083.WBPS14	transcript:MhA1_Contig593.frz3.gene3	mh_1B		mh_1B	A
OG0005155	A	meloidogyne_hapla.PRJNA29083.WBPS14	transcript:MhA1_Contig630.frz3.gene9	mh_1A		mh_1A	A
OG0005157	A	meloidogyne_hapla.PRJNA29083.WBPS14	transcript:MhA1_Contig896.frz3.gene1	mh_MhA1_Contig896		mh_MhA1_Contig896	A
OG0005159	A	meloidogyne_hapla.PRJNA29083.WBPS14	transcript:MhA1_Contig470.frz3.gene6	mh_MhA1_Contig470		mh_MhA1_Contig470	A
OG0005161	A	meloidogyne_hapla.PRJNA29083.WBPS14	transcript:MhA1_Contig1960.frz3.gene6	mh_MhA1_Contig1960		mh_MhA1_Contig1960	A
OG0005162	A	meloidogyne_hapla.PRJNA29083.WBPS14	transcript:MhA1_Contig781.frz3.gene10	mh_13A.17		mh_13A.17	A
OG0005164	C	meloidogyne_hapla.PRJNA29083.WBPS14	transcript:MhA1_Contig540.frz3.fgene2	mh_4		mh_4	C
OG0005165	C	meloidogyne_hapla.PRJNA29083.WBPS14	transcript:MhA1_Contig53.frz3.gene35	mh_1B		mh_1B	C
OG0005166	C	meloidogyne_hapla.PRJNA29083.WBPS14	transcript:MhA1_Contig214.frz3.gene4	mh_MhA1_Contig214		mh_MhA1_Contig214	C
OG0005168	A	meloidogyne_hapla.PRJNA29083.WBPS14	transcript:MhA1_Contig1189.frz3.fgene5	mh_2A		mh_2A	A
OG0005170	A	meloidogyne_hapla.PRJNA29083.WBPS14	transcript:MhA1_Contig1248.frz3.gene2	mh_MhA1_Contig1248		mh_MhA1_Contig1248	A
OG0005172	A	meloidogyne_hapla.PRJNA29083.WBPS14	transcript:MhA1_Contig1332.frz3.fgene1	mh_MhA1_Contig1332		mh_MhA1_Contig1332	A
OG0005174	A	meloidogyne_hapla.PRJNA29083.WBPS14	transcript:MhA1_Contig990.frz3.gene24	mh_1A		mh_1A	A
OG0005176	A	meloidogyne_hapla.PRJNA29083.WBPS14	transcript:MhA1_Contig121.frz3.gene2	mh_11		mh_11	A
OG0005177	A	meloidogyne_hapla.PRJNA29083.WBPS14	transcript:MhA1_Contig1399.frz3.gene1	mh_8		mh_8	A
OG0005178	A	meloidogyne_hapla.PRJNA29083.WBPS14	transcript:MhA1_Contig123.frz3.gene99	mh_13A.17		mh_13A.17	A
OG0005179	A	meloidogyne_hapla.PRJNA29083.WBPS14	transcript:MhA1_Contig123.frz3.gene102	mh_13A.17		mh_13A.17	A
OG0005180	C	meloidogyne_hapla.PRJNA29083.WBPS14	transcript:MhA1_Contig541.frz3.gene6	mh_4		mh_4	C
OG0005181	C	meloidogyne_hapla.PRJNA29083.WBPS14	transcript:MhA1_Contig1243.frz3.gene8	mh_8		mh_8	C
OG0005182	C	meloidogyne_hapla.PRJNA29083.WBPS14	transcript:MhA1_Contig253.frz3.gene46	mh_2B		mh_2B	C
OG0005184	A	meloidogyne_hapla.PRJNA29083.WBPS14	transcript:MhA1_Contig455.frz3.gene8	mh_4		mh_4	A
OG0005185	A	meloidogyne_hapla.PRJNA29083.WBPS14	transcript:MhA1_Contig658.frz3.gene8	mh_MhA1_Contig658		mh_MhA1_Contig658	A
OG0005189	A	meloidogyne_hapla.PRJNA29083.WBPS14	transcript:MhA1_Contig53.frz3.gene52	mh_1B		mh_1B	A
OG0005192	C	meloidogyne_hapla.PRJNA29083.WBPS14	transcript:MhA1_Contig1718.frz3.gene10	mh_2B		mh_2B	C
OG0005193	C	meloidogyne_hapla.PRJNA29083.WBPS14	transcript:MhA1_Contig147.frz3.gene80	mh_6		mh_6	C
OG0005194	A	meloidogyne_hapla.PRJNA29083.WBPS14	transcript:MhA1_Contig437.frz3.gene11	mh_MhA1_Contig437		mh_MhA1_Contig437	A
OG0005195	A	meloidogyne_hapla.PRJNA29083.WBPS14	transcript:MhA1_Contig437.frz3.fgene1	mh_MhA1_Contig437		mh_MhA1_Contig437	A
OG0005196	A	meloidogyne_hapla.PRJNA29083.WBPS14	transcript:MhA1_Contig165.frz3.gene4	mh_13A.17		mh_13A.17	A
OG0005197	A	meloidogyne_hapla.PRJNA29083.WBPS14	transcript:MhA1_Contig2687.frz3.gene1	mh_MhA1_Contig2687		mh_MhA1_Contig2687	A
OG0005198	A	meloidogyne_hapla.PRJNA29083.WBPS14	transcript:MhA1_Contig1135.frz3.gene10	mh_1A		mh_1A	A
OG0005201	A	meloidogyne_hapla.PRJNA29083.WBPS14	transcript:MhA1_Contig487.frz3.gene10	mh_1A		mh_1A	A
OG0005203	A	meloidogyne_hapla.PRJNA29083.WBPS14	transcript:MhA1_Contig2426.frz3.fgene1	mh_3		mh_3	A
OG0005204	A	meloidogyne_hapla.PRJNA29083.WBPS14	transcript:MhA1_Contig2224.frz3.gene6	mh_3		mh_3	A
OG0005206	A	meloidogyne_hapla.PRJNA29083.WBPS14	transcript:MhA1_Contig436.frz3.gene6	mh_13B		mh_13B	A
OG0005208	A	meloidogyne_hapla.PRJNA29083.WBPS14	transcript:MhA1_Contig630.frz3.gene18	mh_1A		mh_1A	A
OG0005209	A	meloidogyne_hapla.PRJNA29083.WBPS14	transcript:MhA1_Contig53.frz3.gene53	mh_1B		mh_1B	A
OG0005210	A	meloidogyne_hapla.PRJNA29083.WBPS14	transcript:MhA1_Contig334.frz3.gene41	mh_7		mh_7	A
OG0005212	A	meloidogyne_hapla.PRJNA29083.WBPS14	transcript:MhA1_Contig91.frz3.gene46	mh_13A.17		mh_13A.17	A
OG0005213	A	meloidogyne_hapla.PRJNA29083.WBPS14	transcript:MhA1_Contig1133.frz3.gene10	mh_10.12.18		mh_10.12.18	A
OG0005215	A	meloidogyne_hapla.PRJNA29083.WBPS14	transcript:MhA1_Contig734.frz3.gene11	mh_20		mh_20	A
OG0005216	A	meloidogyne_hapla.PRJNA29083.WBPS14	transcript:MhA1_Contig256.frz3.fgene2	mh_13A.17		mh_13A.17	A
OG0005217	A	meloidogyne_hapla.PRJNA29083.WBPS14	transcript:MhA1_Contig30.frz3.gene31	mh_1B		mh_1B	A
OG0005218	N	meloidogyne_hapla.PRJNA29083.WBPS14	transcript:MhA1_Contig30.frz3.gene8	mh_1B		mh_1B	N
OG0005221	N	meloidogyne_hapla.PRJNA29083.WBPS14	transcript:MhA1_Contig206.frz3.gene6	mh_21		mh_21	N
OG0005223	N	meloidogyne_hapla.PRJNA29083.WBPS14	transcript:MhA1_Contig2.frz3.gene5	mh_15		mh_15	N
OG0005225	N	meloidogyne_hapla.PRJNA29083.WBPS14	transcript:MhA1_Contig1798.frz3.fgene1	mh_1B		mh_1B	N
OG0005229	N	meloidogyne_hapla.PRJNA29083.WBPS14	transcript:MhA1_Contig1023.frz3.gene2	mh_MhA1_Contig1023		mh_MhA1_Contig1023	N
OG0005231	N	meloidogyne_hapla.PRJNA29083.WBPS14	transcript:MhA1_Contig120.frz3.gene31	mh_11		mh_11	N
OG0005233	N	meloidogyne_hapla.PRJNA29083.WBPS14	transcript:MhA1_Contig1079.frz3.gene14	mh_MhA1_Contig1079		mh_MhA1_Contig1079	N
OG0005236	N	meloidogyne_hapla.PRJNA29083.WBPS14	transcript:MhA1_Contig1805.frz3.gene2	mh_MhA1_Contig1805		mh_MhA1_Contig1805	N
OG0005238	N	meloidogyne_hapla.PRJNA29083.WBPS14	transcript:MhA1_Contig334.frz3.gene15	mh_7		mh_7	N
OG0005239	N	meloidogyne_hapla.PRJNA29083.WBPS14	transcript:MhA1_Contig478.frz3.gene6	mh_2A		mh_2A	N
OG0005240	N	meloidogyne_hapla.PRJNA29083.WBPS14	transcript:MhA1_Contig199.frz3.gene30	mh_21		mh_21	N
OG0005241	N	meloidogyne_hapla.PRJNA29083.WBPS14	transcript:MhA1_Contig354.frz3.gene62	mh_3		mh_3	N
OG0005242	N	meloidogyne_hapla.PRJNA29083.WBPS14	transcript:MhA1_Contig0.frz3.gene88	mh_15		mh_15	N
OG0005247	N	meloidogyne_hapla.PRJNA29083.WBPS14	transcript:MhA1_Contig713.frz3.gene15	mh_MhA1_Contig713		mh_MhA1_Contig713	N
OG0005253	N	meloidogyne_hapla.PRJNA29083.WBPS14	transcript:MhA1_Contig1791.frz3.gene3	mh_MhA1_Contig1791		mh_MhA1_Contig1791	N
OG0005255	N	meloidogyne_hapla.PRJNA29083.WBPS14	transcript:MhA1_Contig417.frz3.gene12	mh_2B		mh_2B	N
OG0005256	N	meloidogyne_hapla.PRJNA29083.WBPS14	transcript:MhA1_Contig2134.frz3.gene13	mh_1B		mh_1B	N
OG0005260	N	meloidogyne_hapla.PRJNA29083.WBPS14	transcript:MhA1_Contig81.frz3.gene7	mh_MhA1_Contig81		mh_MhA1_Contig81	N
OG0005264	N	meloidogyne_hapla.PRJNA29083.WBPS14	transcript:MhA1_Contig342.frz3.gene7	mh_3		mh_3	N
OG0005265	N	meloidogyne_hapla.PRJNA29083.WBPS14	transcript:MhA1_Contig2378.frz3.gene3	mh_1B		mh_1B	N
OG0005266	N	meloidogyne_hapla.PRJNA29083.WBPS14	transcript:MhA1_Contig1061.frz3.gene12	mh_11		mh_11	N
OG0005271	N	meloidogyne_hapla.PRJNA29083.WBPS14	transcript:MhA1_Contig0.frz3.gene79	mh_15		mh_15	N
OG0005272	N	meloidogyne_hapla.PRJNA29083.WBPS14	transcript:MhA1_Contig1032.frz3.gene6	mh_2B		mh_2B	N
OG0005273	C	meloidogyne_hapla.PRJNA29083.WBPS14	transcript:MhA1_Contig116.frz3.gene6	mh_4		mh_4	C
OG0005274	C	meloidogyne_hapla.PRJNA29083.WBPS14	transcript:MhA1_Contig42.frz3.gene25	mh_4		mh_4	C
OG0005275	C	meloidogyne_hapla.PRJNA29083.WBPS14	transcript:MhA1_Contig1263.frz3.fgene2	mh_4		mh_4	C
OG0005277	C	meloidogyne_hapla.PRJNA29083.WBPS14	transcript:MhA1_Contig705.frz3.gene5	mh_4		mh_4	C
OG0005278	C	meloidogyne_hapla.PRJNA29083.WBPS14	transcript:MhA1_Contig45.frz3.gene24	mh_4		mh_4	C
OG0005279	C	meloidogyne_hapla.PRJNA29083.WBPS14	transcript:MhA1_Contig1799.frz3.gene3	mh_8		mh_8	C
OG0005280	A	meloidogyne_hapla.PRJNA29083.WBPS14	transcript:MhA1_Contig74.frz3.gene13	mh_1B		mh_1B	A
OG0005281	A	meloidogyne_hapla.PRJNA29083.WBPS14	transcript:MhA1_Contig262.frz3.gene18	mh_MhA1_Contig262		mh_MhA1_Contig262	A
OG0005282	A	meloidogyne_hapla.PRJNA29083.WBPS14	transcript:MhA1_Contig590.frz3.gene25	mh_1B		mh_1B	A
OG0005283	A	meloidogyne_hapla.PRJNA29083.WBPS14	transcript:MhA1_Contig70.frz3.fgene2	mh_1B		mh_1B	A
OG0005285	A	meloidogyne_hapla.PRJNA29083.WBPS14	transcript:MhA1_Contig70.frz3.gene25	mh_1B		mh_1B	A
OG0005286	A	meloidogyne_hapla.PRJNA29083.WBPS14	transcript:MhA1_Contig658.frz3.fgene1	mh_MhA1_Contig658		mh_MhA1_Contig658	A
OG0005288	C	meloidogyne_hapla.PRJNA29083.WBPS14	transcript:MhA1_Contig1986.frz3.fgene1	mh_21		mh_21	C
OG0005289	C	meloidogyne_hapla.PRJNA29083.WBPS14	transcript:MhA1_Contig993.frz3.gene8	mh_8		mh_8	C
OG0005290	C	meloidogyne_hapla.PRJNA29083.WBPS14	transcript:MhA1_Contig78.frz3.fgene6	mh_5		mh_5	C
OG0005292	C	meloidogyne_hapla.PRJNA29083.WBPS14	transcript:MhA1_Contig1683.frz3.gene3	mh_MhA1_Contig1683		mh_MhA1_Contig1683	C
OG0005293	C	meloidogyne_hapla.PRJNA29083.WBPS14	transcript:MhA1_Contig342.frz3.gene59	mh_3		mh_3	C
OG0005294	C	meloidogyne_hapla.PRJNA29083.WBPS14	transcript:MhA1_Contig113.frz3.gene43	mh_4		mh_4	C
OG0005298	A	meloidogyne_hapla.PRJNA29083.WBPS14	transcript:MhA1_Contig460.frz3.gene2	mh_MhA1_Contig460		mh_MhA1_Contig460	A
OG0005299	A	meloidogyne_hapla.PRJNA29083.WBPS14	transcript:MhA1_Contig353.frz3.gene19	mh_13B		mh_13B	A
OG0005300	A	meloidogyne_hapla.PRJNA29083.WBPS14	transcript:MhA1_Contig255.frz3.gene17	mh_13A.17		mh_13A.17	A
OG0005301	A	meloidogyne_hapla.PRJNA29083.WBPS14	transcript:MhA1_Contig1679.frz3.gene6	mh_MhA1_Contig1679		mh_MhA1_Contig1679	A
OG0005302	A	meloidogyne_hapla.PRJNA29083.WBPS14	transcript:MhA1_Contig484.frz3.gene38	mh_1A		mh_1A	A
OG0005303	C	meloidogyne_hapla.PRJNA29083.WBPS14	transcript:MhA1_Contig291.frz3.gene6	mh_13A.17		mh_13A.17	C
OG0005305	X	meloidogyne_hapla.PRJNA29083.WBPS14	transcript:MhA1_Contig144.frz3.gene6	mh_6		mh_6	X
OG0005308	X	meloidogyne_hapla.PRJNA29083.WBPS14	transcript:MhA1_Contig576.frz3.gene1	mh_MhA1_Contig576		mh_MhA1_Contig576	X
OG0005314	X	meloidogyne_hapla.PRJNA29083.WBPS14	transcript:MhA1_Contig720.frz3.gene2	mh_8		mh_8	X
OG0005315	X	meloidogyne_hapla.PRJNA29083.WBPS14	transcript:MhA1_Contig208.frz3.fgene1	mh_21		mh_21	X
OG0005317	X	meloidogyne_hapla.PRJNA29083.WBPS14	transcript:MhA1_Contig1393.frz3.gene1	mh_MhA1_Contig1393		mh_MhA1_Contig1393	X
OG0005320	X	meloidogyne_hapla.PRJNA29083.WBPS14	transcript:MhA1_Contig586.frz3.gene1	mh_8		mh_8	X
OG0005321	X	meloidogyne_hapla.PRJNA29083.WBPS14	transcript:MhA1_Contig40.frz3.gene13	mh_8		mh_8	X
OG0005323	X	meloidogyne_hapla.PRJNA29083.WBPS14	transcript:MhA1_Contig1443.frz3.gene7	mh_MhA1_Contig1443		mh_MhA1_Contig1443	X
OG0005324	X	meloidogyne_hapla.PRJNA29083.WBPS14	transcript:MhA1_Contig41.frz3.gene21	mh_8		mh_8	X
OG0005325	X	meloidogyne_hapla.PRJNA29083.WBPS14	transcript:MhA1_Contig310.frz3.gene24	mh_MhA1_Contig310		mh_MhA1_Contig310	X
OG0005326	X	meloidogyne_hapla.PRJNA29083.WBPS14	transcript:MhA1_Contig134.frz3.gene39	mh_6		mh_6	X
OG0005327	X	meloidogyne_hapla.PRJNA29083.WBPS14	transcript:MhA1_Contig994.frz3.gene3	mh_MhA1_Contig994		mh_MhA1_Contig994	X
OG0005328	X	meloidogyne_hapla.PRJNA29083.WBPS14	transcript:MhA1_Contig862.frz3.fgene1	mh_MhA1_Contig862		mh_MhA1_Contig862	X
OG0005329	X	meloidogyne_hapla.PRJNA29083.WBPS14	transcript:MhA1_Contig309.frz3.gene71	mh_16		mh_16	X
OG0005330	X	meloidogyne_hapla.PRJNA29083.WBPS14	transcript:MhA1_Contig1299.frz3.fgene1	mh_8		mh_8	X
OG0005331	X	meloidogyne_hapla.PRJNA29083.WBPS14	transcript:MhA1_Contig147.frz3.gene32	mh_6		mh_6	X
OG0005332	X	meloidogyne_hapla.PRJNA29083.WBPS14	transcript:MhA1_Contig219.frz3.gene4	mh_MhA1_Contig219		mh_MhA1_Contig219	X
OG0005335	X	meloidogyne_hapla.PRJNA29083.WBPS14	transcript:MhA1_Contig142.frz3.fgene1	mh_6		mh_6	X
OG0005336	X	meloidogyne_hapla.PRJNA29083.WBPS14	transcript:MhA1_Contig41.frz3.fgene2	mh_8		mh_8	X
OG0005337	X	meloidogyne_hapla.PRJNA29083.WBPS14	transcript:MhA1_Contig2229.frz3.gene2	mh_MhA1_Contig2229		mh_MhA1_Contig2229	X
OG0005338	X	meloidogyne_hapla.PRJNA29083.WBPS14	transcript:MhA1_Contig855.frz3.gene24	mh_MhA1_Contig855		mh_MhA1_Contig855	X
OG0005341	X	meloidogyne_hapla.PRJNA29083.WBPS14	transcript:MhA1_Contig919.frz3.gene12	mh_8		mh_8	X
OG0005342	X	meloidogyne_hapla.PRJNA29083.WBPS14	transcript:MhA1_Contig110.frz3.gene11	mh_MhA1_Contig110		mh_MhA1_Contig110	X
OG0005343	X	meloidogyne_hapla.PRJNA29083.WBPS14	transcript:MhA1_Contig194.frz3.gene27	mh_MhA1_Contig194		mh_MhA1_Contig194	X
OG0005351	X	meloidogyne_hapla.PRJNA29083.WBPS14	transcript:MhA1_Contig1451.frz3.gene11	mh_8		mh_8	X
OG0005353	X	meloidogyne_hapla.PRJNA29083.WBPS14	transcript:MhA1_Contig1751.frz3.fgene2	mh_MhA1_Contig1751		mh_MhA1_Contig1751	X
OG0005354	X	meloidogyne_hapla.PRJNA29083.WBPS14	transcript:MhA1_Contig919.frz3.gene1	mh_8		mh_8	X
OG0005360	X	meloidogyne_hapla.PRJNA29083.WBPS14	transcript:MhA1_Contig474.frz3.gene3	mh_6		mh_6	X
OG0005361	X	meloidogyne_hapla.PRJNA29083.WBPS14	transcript:MhA1_Contig468.frz3.gene23	mh_13A.17		mh_13A.17	X
OG0005362	X	meloidogyne_hapla.PRJNA29083.WBPS14	transcript:MhA1_Contig202.frz3.gene14	mh_MhA1_Contig202		mh_MhA1_Contig202	X
OG0005363	X	meloidogyne_hapla.PRJNA29083.WBPS14	transcript:MhA1_Contig572.frz3.gene8	mh_MhA1_Contig572		mh_MhA1_Contig572	X
OG0005366	X	meloidogyne_hapla.PRJNA29083.WBPS14	transcript:MhA1_Contig1063.frz3.gene1	mh_6		mh_6	X
OG0005369	X	meloidogyne_hapla.PRJNA29083.WBPS14	transcript:MhA1_Contig120.frz3.gene11	mh_11		mh_11	X
OG0005370	X	meloidogyne_hapla.PRJNA29083.WBPS14	transcript:MhA1_Contig737.frz3.gene27	mh_13A.17		mh_13A.17	X
OG0005371	X	meloidogyne_hapla.PRJNA29083.WBPS14	transcript:MhA1_Contig726.frz3.gene1	mh_MhA1_Contig726		mh_MhA1_Contig726	X
OG0005372	X	meloidogyne_hapla.PRJNA29083.WBPS14	transcript:MhA1_Contig121.frz3.gene93	mh_11		mh_11	X
OG0005376	D	meloidogyne_hapla.PRJNA29083.WBPS14	transcript:MhA1_Contig107.frz3.gene26	mh_13B		mh_13B	D
OG0005382	D	meloidogyne_hapla.PRJNA29083.WBPS14	transcript:MhA1_Contig812.frz3.gene1	mh_MhA1_Contig812		mh_MhA1_Contig812	D
OG0005385	D	meloidogyne_hapla.PRJNA29083.WBPS14	transcript:MhA1_Contig125.frz3.gene9	mh_5		mh_5	D
OG0005386	D	meloidogyne_hapla.PRJNA29083.WBPS14	transcript:MhA1_Contig1535.frz3.gene20	mh_2A		mh_2A	D
OG0005387	D	meloidogyne_hapla.PRJNA29083.WBPS14	transcript:MhA1_Contig18.frz3.gene4	mh_2A		mh_2A	D
OG0005389	D	meloidogyne_hapla.PRJNA29083.WBPS14	transcript:MhA1_Contig815.frz3.gene2	mh_21		mh_21	D
OG0005391	D	meloidogyne_hapla.PRJNA29083.WBPS14	transcript:MhA1_Contig795.frz3.gene2	mh_MhA1_Contig795		mh_MhA1_Contig795	D
OG0005392	D	meloidogyne_hapla.PRJNA29083.WBPS14	transcript:MhA1_Contig108.frz3.gene9	mh_13B		mh_13B	D
OG0005394	D	meloidogyne_hapla.PRJNA29083.WBPS14	transcript:MhA1_Contig109.frz3.fgene1	mh_MhA1_Contig109		mh_MhA1_Contig109	D
OG0005395	D	meloidogyne_hapla.PRJNA29083.WBPS14	transcript:MhA1_Contig530.frz3.gene9	mh_2B		mh_2B	D
OG0005398	D	meloidogyne_hapla.PRJNA29083.WBPS14	transcript:MhA1_Contig108.frz3.gene55	mh_13B		mh_13B	D
OG0005399	D	meloidogyne_hapla.PRJNA29083.WBPS14	transcript:MhA1_Contig1092.frz3.gene3	mh_4		mh_4	D
OG0005400	D	meloidogyne_hapla.PRJNA29083.WBPS14	transcript:MhA1_Contig1092.frz3.gene2	mh_4		mh_4	D
OG0005401	D	meloidogyne_hapla.PRJNA29083.WBPS14	transcript:MhA1_Contig877.frz3.gene30	mh_5		mh_5	D
OG0005402	D	meloidogyne_hapla.PRJNA29083.WBPS14	transcript:MhA1_Contig643.frz3.gene6	mh_MhA1_Contig643		mh_MhA1_Contig643	D
OG0005406	D	meloidogyne_hapla.PRJNA29083.WBPS14	transcript:MhA1_Contig1238.frz3.fgene2	mh_13A.17		mh_13A.17	D
OG0005408	D	meloidogyne_hapla.PRJNA29083.WBPS14	transcript:MhA1_Contig841.frz3.gene14	mh_13A.17		mh_13A.17	D
OG0005409	D	meloidogyne_hapla.PRJNA29083.WBPS14	transcript:MhA1_Contig206.frz3.gene5	mh_21		mh_21	D
OG0005412	D	meloidogyne_hapla.PRJNA29083.WBPS14	transcript:MhA1_Contig107.frz3.fgene1	mh_13B		mh_13B	D
OG0005413	D	meloidogyne_hapla.PRJNA29083.WBPS14	transcript:MhA1_Contig1126.frz3.gene1	mh_2A		mh_2A	D
OG0005417	B	meloidogyne_hapla.PRJNA29083.WBPS14	transcript:MhA1_Contig167.frz3.gene11	mh_1A		mh_1A	B
OG0005418	D	meloidogyne_hapla.PRJNA29083.WBPS14	transcript:MhA1_Contig163.frz3.gene39	mh_13A.17		mh_13A.17	D
OG0005419	D	meloidogyne_hapla.PRJNA29083.WBPS14	transcript:MhA1_Contig255.frz3.gene8	mh_13A.17		mh_13A.17	D
OG0005424	D	meloidogyne_hapla.PRJNA29083.WBPS14	transcript:MhA1_Contig1178.frz3.gene4	mh_2A		mh_2A	D
OG0005430	D	meloidogyne_hapla.PRJNA29083.WBPS14	transcript:MhA1_Contig125.frz3.gene16	mh_5		mh_5	D
OG0005432	D	meloidogyne_hapla.PRJNA29083.WBPS14	transcript:MhA1_Contig1793.frz3.gene1	mh_MhA1_Contig1793		mh_MhA1_Contig1793	D
OG0005433	D	meloidogyne_hapla.PRJNA29083.WBPS14	transcript:MhA1_Contig100.frz3.gene18	mh_3		mh_3	D
OG0005435	D	meloidogyne_hapla.PRJNA29083.WBPS14	transcript:MhA1_Contig373.frz3.gene9	mh_10.12.18		mh_10.12.18	D
OG0005437	D	meloidogyne_hapla.PRJNA29083.WBPS14	transcript:MhA1_Contig624.frz3.gene16	mh_5		mh_5	D
OG0005438	D	meloidogyne_hapla.PRJNA29083.WBPS14	transcript:MhA1_Contig623.frz3.fgene1	mh_MhA1_Contig623		mh_MhA1_Contig623	D
OG0005440	D	meloidogyne_hapla.PRJNA29083.WBPS14	transcript:MhA1_Contig255.frz3.gene3	mh_13A.17		mh_13A.17	D
OG0005441	D	meloidogyne_hapla.PRJNA29083.WBPS14	transcript:MhA1_Contig255.frz3.gene23	mh_13A.17		mh_13A.17	D
OG0005443	D	meloidogyne_hapla.PRJNA29083.WBPS14	transcript:MhA1_Contig645.frz3.fgene3	mh_MhA1_Contig645		mh_MhA1_Contig645	D
OG0005447	D	meloidogyne_hapla.PRJNA29083.WBPS14	transcript:MhA1_Contig108.frz3.gene52	mh_13B		mh_13B	D
OG0005448	D	meloidogyne_hapla.PRJNA29083.WBPS14	transcript:MhA1_Contig1084.frz3.gene6	mh_MhA1_Contig1084		mh_MhA1_Contig1084	D
OG0005450	D	meloidogyne_hapla.PRJNA29083.WBPS14	transcript:MhA1_Contig82.frz3.gene15	mh_5		mh_5	D
OG0005452	D	meloidogyne_hapla.PRJNA29083.WBPS14	transcript:MhA1_Contig331.frz3.gene4	mh_13A.17		mh_13A.17	D
OG0005456	D	meloidogyne_hapla.PRJNA29083.WBPS14	transcript:MhA1_Contig2660.frz3.fgene1	mh_MhA1_Contig2660		mh_MhA1_Contig2660	D
OG0005459	D	meloidogyne_hapla.PRJNA29083.WBPS14	transcript:MhA1_Contig1858.frz3.gene5	mh_3		mh_3	D
OG0005461	D	meloidogyne_hapla.PRJNA29083.WBPS14	transcript:MhA1_Contig2784.frz3.gene2	mh_MhA1_Contig2784		mh_MhA1_Contig2784	D
OG0005463	D	meloidogyne_hapla.PRJNA29083.WBPS14	transcript:MhA1_Contig126.frz3.gene5	mh_5		mh_5	D
OG0005465	D	meloidogyne_hapla.PRJNA29083.WBPS14	transcript:MhA1_Contig53.frz3.gene41	mh_1B		mh_1B	D
OG0005467	D	meloidogyne_hapla.PRJNA29083.WBPS14	transcript:MhA1_Contig1474.frz3.gene10	mh_4		mh_4	D
OG0005470	D	meloidogyne_hapla.PRJNA29083.WBPS14	transcript:MhA1_Contig202.frz3.fgene3	mh_MhA1_Contig202		mh_MhA1_Contig202	D
OG0005471	D	meloidogyne_hapla.PRJNA29083.WBPS14	transcript:MhA1_Contig641.frz3.gene2	mh_MhA1_Contig641		mh_MhA1_Contig641	D
OG0005473	D	meloidogyne_hapla.PRJNA29083.WBPS14	transcript:MhA1_Contig641.frz3.gene1	mh_MhA1_Contig641		mh_MhA1_Contig641	D
OG0005475	D	meloidogyne_hapla.PRJNA29083.WBPS14	transcript:MhA1_Contig0.frz3.fgene4	mh_15		mh_15	D
OG0005477	D	meloidogyne_hapla.PRJNA29083.WBPS14	transcript:MhA1_Contig963.frz3.gene2	mh_1A		mh_1A	D
OG0005479	D	meloidogyne_hapla.PRJNA29083.WBPS14	transcript:MhA1_Contig1095.frz3.gene9	mh_5		mh_5	D
OG0005480	D	meloidogyne_hapla.PRJNA29083.WBPS14	transcript:MhA1_Contig373.frz3.gene14	mh_10.12.18		mh_10.12.18	D
OG0005483	D	meloidogyne_hapla.PRJNA29083.WBPS14	transcript:MhA1_Contig1900.frz3.fgene1	mh_4		mh_4	D
OG0005484	D	meloidogyne_hapla.PRJNA29083.WBPS14	transcript:MhA1_Contig78.frz3.gene35	mh_5		mh_5	D
OG0005486	D	meloidogyne_hapla.PRJNA29083.WBPS14	transcript:MhA1_Contig1594.frz3.gene4	mh_21		mh_21	D
OG0005487	D	meloidogyne_hapla.PRJNA29083.WBPS14	transcript:MhA1_Contig255.frz3.gene30	mh_13A.17		mh_13A.17	D
OG0005488	D	meloidogyne_hapla.PRJNA29083.WBPS14	transcript:MhA1_Contig1555.frz3.gene14	mh_2B		mh_2B	D
OG0005489	D	meloidogyne_hapla.PRJNA29083.WBPS14	transcript:MhA1_Contig1358.frz3.gene9	mh_MhA1_Contig1358		mh_MhA1_Contig1358	D
OG0005494	D	meloidogyne_hapla.PRJNA29083.WBPS14	transcript:MhA1_Contig506.frz3.gene6	mh_MhA1_Contig506		mh_MhA1_Contig506	D
OG0005497	D	meloidogyne_hapla.PRJNA29083.WBPS14	transcript:MhA1_Contig107.frz3.gene27	mh_13B		mh_13B	D
OG0005499	D	meloidogyne_hapla.PRJNA29083.WBPS14	transcript:MhA1_Contig2545.frz3.gene1	mh_MhA1_Contig2545		mh_MhA1_Contig2545	D
OG0005502	D	meloidogyne_hapla.PRJNA29083.WBPS14	transcript:MhA1_Contig108.20	mh_13B		mh_13B	D
OG0005503	D	meloidogyne_hapla.PRJNA29083.WBPS14	transcript:MhA1_Contig256.frz3.gene4	mh_13A.17		mh_13A.17	D
OG0005504	D	meloidogyne_hapla.PRJNA29083.WBPS14	transcript:MhA1_Contig213.frz3.gene44	mh_MhA1_Contig213		mh_MhA1_Contig213	D
OG0005506	D	meloidogyne_hapla.PRJNA29083.WBPS14	transcript:MhA1_Contig2127.frz3.gene5	mh_MhA1_Contig2127		mh_MhA1_Contig2127	D
OG0005507	D	meloidogyne_hapla.PRJNA29083.WBPS14	transcript:MhA1_Contig258.frz3.gene13	mh_2B		mh_2B	D
OG0005509	D	meloidogyne_hapla.PRJNA29083.WBPS14	transcript:MhA1_Contig333.frz3.fgene2	mh_13A.17		mh_13A.17	D
OG0005510	D	meloidogyne_hapla.PRJNA29083.WBPS14	transcript:MhA1_Contig193.frz3.gene15	mh_MhA1_Contig193		mh_MhA1_Contig193	D
OG0005511	D	meloidogyne_hapla.PRJNA29083.WBPS14	transcript:MhA1_Contig759.frz3.gene17	mh_21		mh_21	D
OG0005514	D	meloidogyne_hapla.PRJNA29083.WBPS14	transcript:MhA1_Contig155.frz3.gene20	mh_21		mh_21	D
OG0005518	D	meloidogyne_hapla.PRJNA29083.WBPS14	transcript:MhA1_Contig194.frz3.gene35	mh_MhA1_Contig194		mh_MhA1_Contig194	D
OG0005519	D	meloidogyne_hapla.PRJNA29083.WBPS14	transcript:MhA1_Contig405.frz3.fgene2	mh_20		mh_20	D
OG0005520	D	meloidogyne_hapla.PRJNA29083.WBPS14	transcript:MhA1_Contig1836.frz3.gene7	mh_MhA1_Contig1836		mh_MhA1_Contig1836	D
OG0005522	D	meloidogyne_hapla.PRJNA29083.WBPS14	transcript:MhA1_Contig1828.frz3.gene6	mh_7		mh_7	D
OG0005524	D	meloidogyne_hapla.PRJNA29083.WBPS14	transcript:MhA1_Contig665.frz3.gene5	mh_MhA1_Contig665		mh_MhA1_Contig665	D
OG0005525	D	meloidogyne_hapla.PRJNA29083.WBPS14	transcript:MhA1_Contig108.frz3.gene10	mh_13B		mh_13B	D
OG0005527	D	meloidogyne_hapla.PRJNA29083.WBPS14	transcript:MhA1_Contig755.frz3.gene11	mh_2A		mh_2A	D
OG0005528	D	meloidogyne_hapla.PRJNA29083.WBPS14	transcript:MhA1_Contig492.frz3.gene33	mh_4		mh_4	D
OG0005529	D	meloidogyne_hapla.PRJNA29083.WBPS14	transcript:MhA1_Contig882.frz3.fgene1	mh_MhA1_Contig882		mh_MhA1_Contig882	D
OG0005533	D	meloidogyne_hapla.PRJNA29083.WBPS14	transcript:MhA1_Contig1602.frz3.gene4	mh_2A		mh_2A	D
OG0005535	D	meloidogyne_hapla.PRJNA29083.WBPS14	transcript:MhA1_Contig163.frz3.gene34	mh_13A.17		mh_13A.17	D
OG0005537	D	meloidogyne_hapla.PRJNA29083.WBPS14	transcript:MhA1_Contig527.frz3.gene1	mh_2B		mh_2B	D
OG0005538	D	meloidogyne_hapla.PRJNA29083.WBPS14	transcript:MhA1_Contig214.frz3.gene13	mh_MhA1_Contig214		mh_MhA1_Contig214	D
OG0005539	D	meloidogyne_hapla.PRJNA29083.WBPS14	transcript:MhA1_Contig1727.frz3.gene4	mh_3		mh_3	D
OG0005540	D	meloidogyne_hapla.PRJNA29083.WBPS14	transcript:MhA1_Contig1352.frz3.gene16	mh_MhA1_Contig1352		mh_MhA1_Contig1352	D
OG0005546	D	meloidogyne_hapla.PRJNA29083.WBPS14	transcript:MhA1_Contig523.frz3.fgene1	mh_2B		mh_2B	D
OG0005549	D	meloidogyne_hapla.PRJNA29083.WBPS14	transcript:MhA1_Contig1391.frz3.gene10	mh_MhA1_Contig1391		mh_MhA1_Contig1391	D
OG0005550	D	meloidogyne_hapla.PRJNA29083.WBPS14	transcript:MhA1_Contig645.frz3.fgene1	mh_MhA1_Contig645		mh_MhA1_Contig645	D
OG0005552	D	meloidogyne_hapla.PRJNA29083.WBPS14	transcript:MhA1_Contig811.frz3.gene12	mh_13A.17		mh_13A.17	D
OG0005555	D	meloidogyne_hapla.PRJNA29083.WBPS14	transcript:MhA1_Contig1596.frz3.gene1	mh_MhA1_Contig1596		mh_MhA1_Contig1596	D
OG0005557	D	meloidogyne_hapla.PRJNA29083.WBPS14	transcript:MhA1_Contig127.frz3.gene62	mh_5		mh_5	D
OG0005559	D	meloidogyne_hapla.PRJNA29083.WBPS14	transcript:MhA1_Contig1991.frz3.gene3	mh_16		mh_16	D
OG0005560	D	meloidogyne_hapla.PRJNA29083.WBPS14	transcript:MhA1_Contig20.frz3.gene64	mh_2A		mh_2A	D
OG0005561	D	meloidogyne_hapla.PRJNA29083.WBPS14	transcript:MhA1_Contig20.frz3.gene36	mh_2A		mh_2A	D
OG0005562	D	meloidogyne_hapla.PRJNA29083.WBPS14	transcript:MhA1_Contig1392.frz3.gene1	mh_MhA1_Contig1392		mh_MhA1_Contig1392	D
OG0005577	B	meloidogyne_hapla.PRJNA29083.WBPS14	transcript:MhA1_Contig1269.frz3.fgene1	mh_10.12.18		mh_10.12.18	B
OG0005578	B	meloidogyne_hapla.PRJNA29083.WBPS14	transcript:MhA1_Contig512.frz3.gene17	mh_5		mh_5	B
OG0005579	B	meloidogyne_hapla.PRJNA29083.WBPS14	transcript:MhA1_Contig1767.frz3.gene4	mh_MhA1_Contig1767		mh_MhA1_Contig1767	B
OG0005580	B	meloidogyne_hapla.PRJNA29083.WBPS14	transcript:MhA1_Contig56.frz3.gene13	mh_1B		mh_1B	B
OG0005581	B	meloidogyne_hapla.PRJNA29083.WBPS14	transcript:MhA1_Contig1774.frz3.fgene1	mh_1A		mh_1A	B
OG0005582	B	meloidogyne_hapla.PRJNA29083.WBPS14	transcript:MhA1_Contig1774.frz3.gene3	mh_1A		mh_1A	B
OG0005583	B	meloidogyne_hapla.PRJNA29083.WBPS14	transcript:MhA1_Contig1257.frz3.gene1	mh_MhA1_Contig1257		mh_MhA1_Contig1257	B
OG0005585	B	meloidogyne_hapla.PRJNA29083.WBPS14	transcript:MhA1_Contig734.frz3.gene25	mh_20		mh_20	B
OG0005590	B	meloidogyne_hapla.PRJNA29083.WBPS14	transcript:MhA1_Contig131.frz3.gene14	mh_MhA1_Contig131		mh_MhA1_Contig131	B
OG0005591	B	meloidogyne_hapla.PRJNA29083.WBPS14	transcript:MhA1_Contig131.frz3.gene13	mh_MhA1_Contig131		mh_MhA1_Contig131	B
OG0005593	B	meloidogyne_hapla.PRJNA29083.WBPS14	transcript:MhA1_Contig315.frz3.gene13	mh_MhA1_Contig315		mh_MhA1_Contig315	B
OG0005597	B	meloidogyne_hapla.PRJNA29083.WBPS14	transcript:MhA1_Contig199.frz3.gene22	mh_21		mh_21	B
OG0005598	B	meloidogyne_hapla.PRJNA29083.WBPS14	transcript:MhA1_Contig1462.frz3.fgene2	mh_MhA1_Contig1462		mh_MhA1_Contig1462	B
OG0005599	B	meloidogyne_hapla.PRJNA29083.WBPS14	transcript:MhA1_Contig354.frz3.gene49	mh_3		mh_3	B
OG0005602	B	meloidogyne_hapla.PRJNA29083.WBPS14	transcript:MhA1_Contig381.frz3.gene2	mh_MhA1_Contig381		mh_MhA1_Contig381	B
OG0005603	B	meloidogyne_hapla.PRJNA29083.WBPS14	transcript:MhA1_Contig386.frz3.gene3	mh_MhA1_Contig386		mh_MhA1_Contig386	B
OG0005605	B	meloidogyne_hapla.PRJNA29083.WBPS14	transcript:MhA1_Contig253.frz3.gene49	mh_2B		mh_2B	B
OG0005607	B	meloidogyne_hapla.PRJNA29083.WBPS14	transcript:MhA1_Contig1403.frz3.gene4	mh_5		mh_5	B
OG0005608	B	meloidogyne_hapla.PRJNA29083.WBPS14	transcript:MhA1_Contig825.frz3.gene9	mh_2B		mh_2B	B
OG0005609	B	meloidogyne_hapla.PRJNA29083.WBPS14	transcript:MhA1_Contig893.frz3.gene19	mh_10.12.18		mh_10.12.18	B
OG0005610	B	meloidogyne_hapla.PRJNA29083.WBPS14	transcript:MhA1_Contig277.frz3.gene19	mh_3		mh_3	B
OG0005613	B	meloidogyne_hapla.PRJNA29083.WBPS14	transcript:MhA1_Contig962.frz3.gene1	mh_1A		mh_1A	B
OG0005614	B	meloidogyne_hapla.PRJNA29083.WBPS14	transcript:MhA1_Contig53.frz3.fgene1	mh_1B		mh_1B	B
OG0005616	B	meloidogyne_hapla.PRJNA29083.WBPS14	transcript:MhA1_Contig1721.frz3.gene5	mh_6		mh_6	B
OG0005618	B	meloidogyne_hapla.PRJNA29083.WBPS14	transcript:MhA1_Contig730.frz3.gene1	mh_13A.17		mh_13A.17	B
OG0005619	E	meloidogyne_hapla.PRJNA29083.WBPS14	transcript:MhA1_Contig118.frz3.gene95	mh_16		mh_16	E
OG0005621	E	meloidogyne_hapla.PRJNA29083.WBPS14	transcript:MhA1_Contig118.frz3.gene11	mh_16		mh_16	E
OG0005622	B	meloidogyne_hapla.PRJNA29083.WBPS14	transcript:MhA1_Contig893.frz3.gene24	mh_10.12.18		mh_10.12.18	B
OG0005623	B	meloidogyne_hapla.PRJNA29083.WBPS14	transcript:MhA1_Contig131.frz3.gene17	mh_MhA1_Contig131		mh_MhA1_Contig131	B
OG0005624	B	meloidogyne_hapla.PRJNA29083.WBPS14	transcript:MhA1_Contig168.frz3.gene24	mh_1A		mh_1A	B
OG0005625	B	meloidogyne_hapla.PRJNA29083.WBPS14	transcript:MhA1_Contig1285.frz3.fgene2	mh_MhA1_Contig1285		mh_MhA1_Contig1285	B
OG0005627	B	meloidogyne_hapla.PRJNA29083.WBPS14	transcript:MhA1_Contig618.frz3.gene9	mh_11		mh_11	B
OG0005628	B	meloidogyne_hapla.PRJNA29083.WBPS14	transcript:MhA1_Contig877.frz3.gene10	mh_5		mh_5	B
OG0005629	B	meloidogyne_hapla.PRJNA29083.WBPS14	transcript:MhA1_Contig309.frz3.gene32	mh_16		mh_16	B
OG0005631	B	meloidogyne_hapla.PRJNA29083.WBPS14	transcript:MhA1_Contig1109.frz3.gene5	mh_1A		mh_1A	B
OG0005632	B	meloidogyne_hapla.PRJNA29083.WBPS14	transcript:MhA1_Contig484.frz3.fgene8	mh_1A		mh_1A	B
OG0005635	B	meloidogyne_hapla.PRJNA29083.WBPS14	transcript:MhA1_Contig512.frz3.gene20	mh_5		mh_5	B
OG0005636	B	meloidogyne_hapla.PRJNA29083.WBPS14	transcript:MhA1_Contig800.frz3.gene13	mh_5		mh_5	B
OG0005637	B	meloidogyne_hapla.PRJNA29083.WBPS14	transcript:MhA1_Contig232.frz3.gene16	mh_10.12.18		mh_10.12.18	B
OG0005640	B	meloidogyne_hapla.PRJNA29083.WBPS14	transcript:MhA1_Contig1254.frz3.gene3	mh_MhA1_Contig1254		mh_MhA1_Contig1254	B
OG0005642	B	meloidogyne_hapla.PRJNA29083.WBPS14	transcript:MhA1_Contig384.frz3.gene4	mh_10.12.18		mh_10.12.18	B
OG0005644	B	meloidogyne_hapla.PRJNA29083.WBPS14	transcript:MhA1_Contig2322.frz3.gene4	mh_MhA1_Contig2322		mh_MhA1_Contig2322	B
OG0005645	B	meloidogyne_hapla.PRJNA29083.WBPS14	transcript:MhA1_Contig1078.frz3.gene15	mh_1A		mh_1A	B
OG0005646	B	meloidogyne_hapla.PRJNA29083.WBPS14	transcript:MhA1_Contig1246.frz3.gene21	mh_5		mh_5	B
OG0005649	B	meloidogyne_hapla.PRJNA29083.WBPS14	transcript:MhA1_Contig2221.frz3.gene2	mh_MhA1_Contig2221		mh_MhA1_Contig2221	B
OG0005650	B	meloidogyne_hapla.PRJNA29083.WBPS14	transcript:MhA1_Contig1224.frz3.gene3	mh_1B		mh_1B	B
OG0005653	B	meloidogyne_hapla.PRJNA29083.WBPS14	transcript:MhA1_Contig1282.frz3.gene4	mh_MhA1_Contig1282		mh_MhA1_Contig1282	B
OG0005656	B	meloidogyne_hapla.PRJNA29083.WBPS14	transcript:MhA1_Contig1161.frz3.gene11	mh_5		mh_5	B
OG0005658	B	meloidogyne_hapla.PRJNA29083.WBPS14	transcript:MhA1_Contig984.frz3.gene22	mh_1A		mh_1A	B
OG0005660	B	meloidogyne_hapla.PRJNA29083.WBPS14	transcript:MhA1_Contig408.frz3.gene2	mh_MhA1_Contig408		mh_MhA1_Contig408	B
OG0005661	B	meloidogyne_hapla.PRJNA29083.WBPS14	transcript:MhA1_Contig1191.frz3.gene8	mh_7		mh_7	B
OG0005662	B	meloidogyne_hapla.PRJNA29083.WBPS14	transcript:MhA1_Contig1499.frz3.gene5	mh_MhA1_Contig1499		mh_MhA1_Contig1499	B
OG0005663	B	meloidogyne_hapla.PRJNA29083.WBPS14	transcript:MhA1_Contig1416.frz3.gene5	mh_11		mh_11	B
OG0005664	B	meloidogyne_hapla.PRJNA29083.WBPS14	transcript:MhA1_Contig1145.frz3.gene6	mh_MhA1_Contig1145		mh_MhA1_Contig1145	B
OG0005665	B	meloidogyne_hapla.PRJNA29083.WBPS14	transcript:MhA1_Contig827.frz3.gene13	mh_2B		mh_2B	B
OG0005666	B	meloidogyne_hapla.PRJNA29083.WBPS14	transcript:MhA1_Contig800.frz3.gene8	mh_5		mh_5	B
OG0005669	B	meloidogyne_hapla.PRJNA29083.WBPS14	transcript:MhA1_Contig194.frz3.gene12	mh_MhA1_Contig194		mh_MhA1_Contig194	B
OG0005670	B	meloidogyne_hapla.PRJNA29083.WBPS14	transcript:MhA1_Contig1698.frz3.gene6	mh_10.12.18		mh_10.12.18	B
OG0005671	B	meloidogyne_hapla.PRJNA29083.WBPS14	transcript:MhA1_Contig1254.frz3.gene17	mh_MhA1_Contig1254		mh_MhA1_Contig1254	B
OG0005675	B	meloidogyne_hapla.PRJNA29083.WBPS14	transcript:MhA1_Contig1420.frz3.gene6	mh_1B		mh_1B	B
OG0005676	B	meloidogyne_hapla.PRJNA29083.WBPS14	transcript:MhA1_Contig1375.frz3.gene7	mh_8		mh_8	B
OG0005678	B	meloidogyne_hapla.PRJNA29083.WBPS14	transcript:MhA1_Contig510.frz3.gene5	mh_5		mh_5	B
OG0005679	B	meloidogyne_hapla.PRJNA29083.WBPS14	transcript:MhA1_Contig223.frz3.gene10	mh_16		mh_16	B
OG0005683	B	meloidogyne_hapla.PRJNA29083.WBPS14	transcript:MhA1_Contig474.frz3.gene1	mh_6		mh_6	B
OG0005686	B	meloidogyne_hapla.PRJNA29083.WBPS14	transcript:MhA1_Contig389.frz3.gene9	mh_4		mh_4	B
OG0005687	B	meloidogyne_hapla.PRJNA29083.WBPS14	transcript:MhA1_Contig2342.frz3.fgene1	mh_2A		mh_2A	B
OG0005690	B	meloidogyne_hapla.PRJNA29083.WBPS14	transcript:MhA1_Contig1078.frz3.gene4	mh_1A		mh_1A	B
OG0005691	B	meloidogyne_hapla.PRJNA29083.WBPS14	transcript:MhA1_Contig53.frz3.gene1	mh_1B		mh_1B	B
OG0005693	B	meloidogyne_hapla.PRJNA29083.WBPS14	transcript:MhA1_Contig1689.frz3.gene9	mh_2B		mh_2B	B
OG0005694	B	meloidogyne_hapla.PRJNA29083.WBPS14	transcript:MhA1_Contig132.frz3.gene29	mh_13A.17		mh_13A.17	B
OG0005695	B	meloidogyne_hapla.PRJNA29083.WBPS14	transcript:MhA1_Contig800.frz3.gene34	mh_5		mh_5	B
OG0005696	B	meloidogyne_hapla.PRJNA29083.WBPS14	transcript:MhA1_Contig130.frz3.gene59	mh_13A.17		mh_13A.17	B
OG0005698	B	meloidogyne_hapla.PRJNA29083.WBPS14	transcript:MhA1_Contig1719.frz3.gene12	mh_MhA1_Contig1719		mh_MhA1_Contig1719	B
OG0005700	B	meloidogyne_hapla.PRJNA29083.WBPS14	transcript:MhA1_Contig825.frz3.gene5	mh_2B		mh_2B	B
OG0005702	B	meloidogyne_hapla.PRJNA29083.WBPS14	transcript:MhA1_Contig1073.frz3.gene5	mh_21		mh_21	B
OG0005704	B	meloidogyne_hapla.PRJNA29083.WBPS14	transcript:MhA1_Contig648.frz3.gene3	mh_1A		mh_1A	B
OG0005705	B	meloidogyne_hapla.PRJNA29083.WBPS14	transcript:MhA1_Contig2279.frz3.gene2	mh_MhA1_Contig2279		mh_MhA1_Contig2279	B
OG0005706	B	meloidogyne_hapla.PRJNA29083.WBPS14	transcript:MhA1_Contig1101.frz3.gene10	mh_MhA1_Contig1101		mh_MhA1_Contig1101	B
OG0005707	B	meloidogyne_hapla.PRJNA29083.WBPS14	transcript:MhA1_Contig253.frz3.fgene1	mh_2B		mh_2B	B
OG0005708	B	meloidogyne_hapla.PRJNA29083.WBPS14	transcript:MhA1_Contig132.frz3.fgene4	mh_13A.17		mh_13A.17	B
OG0005712	B	meloidogyne_hapla.PRJNA29083.WBPS14	transcript:MhA1_Contig353.frz3.gene20	mh_13B		mh_13B	B
OG0005713	B	meloidogyne_hapla.PRJNA29083.WBPS14	transcript:MhA1_Contig1318.frz3.gene8	mh_7		mh_7	B
OG0005715	B	meloidogyne_hapla.PRJNA29083.WBPS14	transcript:MhA1_Contig684.frz3.gene17	mh_10.12.18		mh_10.12.18	B
OG0005718	B	meloidogyne_hapla.PRJNA29083.WBPS14	transcript:MhA1_Contig1584.frz3.gene8	mh_5		mh_5	B
OG0005720	B	meloidogyne_hapla.PRJNA29083.WBPS14	transcript:MhA1_Contig1789.frz3.gene2	mh_5		mh_5	B
OG0005721	B	meloidogyne_hapla.PRJNA29083.WBPS14	transcript:MhA1_Contig1257.frz3.gene4	mh_MhA1_Contig1257		mh_MhA1_Contig1257	B
OG0005724	B	meloidogyne_hapla.PRJNA29083.WBPS14	transcript:MhA1_Contig1246.frz3.gene9	mh_5		mh_5	B
OG0005726	B	meloidogyne_hapla.PRJNA29083.WBPS14	transcript:MhA1_Contig132.frz3.gene4	mh_13A.17		mh_13A.17	B
OG0005729	B	meloidogyne_hapla.PRJNA29083.WBPS14	transcript:MhA1_Contig1051.frz3.gene10	mh_10.12.18		mh_10.12.18	B
OG0005730	B	meloidogyne_hapla.PRJNA29083.WBPS14	transcript:MhA1_Contig1763.frz3.gene5	mh_2A		mh_2A	B
OG0005731	B	meloidogyne_hapla.PRJNA29083.WBPS14	transcript:MhA1_Contig982.frz3.gene7	mh_2B		mh_2B	B
OG0005732	B	meloidogyne_hapla.PRJNA29083.WBPS14	transcript:MhA1_Contig461.frz3.gene2	mh_4		mh_4	B
OG0005733	B	meloidogyne_hapla.PRJNA29083.WBPS14	transcript:MhA1_Contig1477.frz3.gene10	mh_10.12.18		mh_10.12.18	B
OG0005735	B	meloidogyne_hapla.PRJNA29083.WBPS14	transcript:MhA1_Contig213.frz3.gene2	mh_MhA1_Contig213		mh_MhA1_Contig213	B
OG0005736	B	meloidogyne_hapla.PRJNA29083.WBPS14	transcript:MhA1_Contig168.frz3.fgene5	mh_1A		mh_1A	B
OG0005740	B	meloidogyne_hapla.PRJNA29083.WBPS14	transcript:MhA1_Contig407.frz3.gene2	mh_2B		mh_2B	B
OG0005741	B	meloidogyne_hapla.PRJNA29083.WBPS14	transcript:MhA1_Contig1476.frz3.gene5	mh_5		mh_5	B
OG0005746	B	meloidogyne_hapla.PRJNA29083.WBPS14	transcript:MhA1_Contig100.frz3.gene3	mh_3		mh_3	B
OG0005748	B	meloidogyne_hapla.PRJNA29083.WBPS14	transcript:MhA1_Contig253.frz3.gene4	mh_2B		mh_2B	B
OG0005749	B	meloidogyne_hapla.PRJNA29083.WBPS14	transcript:MhA1_Contig2890.frz3.gene1	mh_MhA1_Contig2890		mh_MhA1_Contig2890	B
OG0005752	B	meloidogyne_hapla.PRJNA29083.WBPS14	transcript:MhA1_Contig53.frz3.gene7	mh_1B		mh_1B	B
OG0005754	B	meloidogyne_hapla.PRJNA29083.WBPS14	transcript:MhA1_Contig729.frz3.fgene3	mh_MhA1_Contig729		mh_MhA1_Contig729	B
OG0005755	B	meloidogyne_hapla.PRJNA29083.WBPS14	transcript:MhA1_Contig1032.frz3.gene30	mh_2B		mh_2B	B
OG0005756	B	meloidogyne_hapla.PRJNA29083.WBPS14	transcript:MhA1_Contig899.frz3.gene1	mh_MhA1_Contig899		mh_MhA1_Contig899	B
OG0005757	B	meloidogyne_hapla.PRJNA29083.WBPS14	transcript:MhA1_Contig1246.frz3.gene3	mh_5		mh_5	B
OG0005758	B	meloidogyne_hapla.PRJNA29083.WBPS14	transcript:MhA1_Contig2334.frz3.gene9	mh_MhA1_Contig2334		mh_MhA1_Contig2334	B
OG0005759	B	meloidogyne_hapla.PRJNA29083.WBPS14	transcript:MhA1_Contig342.frz3.gene5	mh_3		mh_3	B
OG0005761	B	meloidogyne_hapla.PRJNA29083.WBPS14	transcript:MhA1_Contig1565.frz3.fgene1	mh_5		mh_5	B
OG0005762	B	meloidogyne_hapla.PRJNA29083.WBPS14	transcript:MhA1_Contig1245.frz3.gene8	mh_14		mh_14	B
OG0005763	B	meloidogyne_hapla.PRJNA29083.WBPS14	transcript:MhA1_Contig194.frz3.gene6	mh_MhA1_Contig194		mh_MhA1_Contig194	B
OG0005764	B	meloidogyne_hapla.PRJNA29083.WBPS14	transcript:MhA1_Contig194.frz3.gene5	mh_MhA1_Contig194		mh_MhA1_Contig194	B
OG0005766	B	meloidogyne_hapla.PRJNA29083.WBPS14	transcript:MhA1_Contig2870.frz3.gene1	mh_MhA1_Contig2870		mh_MhA1_Contig2870	B
OG0005767	B	meloidogyne_hapla.PRJNA29083.WBPS14	transcript:MhA1_Contig962.frz3.gene2	mh_1A		mh_1A	B
OG0005771	B	meloidogyne_hapla.PRJNA29083.WBPS14	transcript:MhA1_Contig2035.frz3.gene10	mh_5		mh_5	B
OG0005783	B	meloidogyne_hapla.PRJNA29083.WBPS14	transcript:MhA1_Contig1233.frz3.gene4	mh_MhA1_Contig1233		mh_MhA1_Contig1233	B
OG0005798	C	meloidogyne_hapla.PRJNA29083.WBPS14	transcript:MhA1_Contig290.frz3.gene4	mh_13A.17		mh_13A.17	C
OG0005799	C	meloidogyne_hapla.PRJNA29083.WBPS14	transcript:MhA1_Contig1070.frz3.gene7	mh_1A		mh_1A	C
OG0005800	C	meloidogyne_hapla.PRJNA29083.WBPS14	transcript:MhA1_Contig809.frz3.fgene1	mh_3		mh_3	C
OG0005801	C	meloidogyne_hapla.PRJNA29083.WBPS14	transcript:MhA1_Contig121.frz3.gene84	mh_11		mh_11	C
OG0005805	X	meloidogyne_hapla.PRJNA29083.WBPS14	transcript:MhA1_Contig147.frz3.gene6	mh_6		mh_6	X
OG0005841	N	meloidogyne_hapla.PRJNA29083.WBPS14	transcript:MhA1_Contig1266.frz3.gene2	mh_2B		mh_2B	N
OG0005854	E	meloidogyne_hapla.PRJNA29083.WBPS14	transcript:MhA1_Contig90.frz3.gene3	mh_13A.17		mh_13A.17	E
OG0005952	E	meloidogyne_hapla.PRJNA29083.WBPS14	transcript:MhA1_Contig913.frz3.gene8	mh_MhA1_Contig913		mh_MhA1_Contig913	E
OG0005978	E	meloidogyne_hapla.PRJNA29083.WBPS14	transcript:MhA1_Contig2021.frz3.gene11	mh_16		mh_16	E
OG0005983	E	meloidogyne_hapla.PRJNA29083.WBPS14	transcript:MhA1_Contig755.frz3.gene7	mh_2A		mh_2A	E
OG0005985	E	meloidogyne_hapla.PRJNA29083.WBPS14	transcript:MhA1_Contig659.frz3.gene3	mh_4		mh_4	E
OG0005986	E	meloidogyne_hapla.PRJNA29083.WBPS14	transcript:MhA1_Contig1493.frz3.gene6	mh_16		mh_16	E
OG0005989	E	meloidogyne_hapla.PRJNA29083.WBPS14	transcript:MhA1_Contig2.frz3.gene12	mh_15		mh_15	E
OG0005997	E	meloidogyne_hapla.PRJNA29083.WBPS14	transcript:MhA1_Contig2594.frz3.gene4	mh_3		mh_3	E
OG0006010	E	meloidogyne_hapla.PRJNA29083.WBPS14	transcript:MhA1_Contig310.frz3.gene2	mh_MhA1_Contig310		mh_MhA1_Contig310	E
OG0006011	E	meloidogyne_hapla.PRJNA29083.WBPS14	transcript:MhA1_Contig1915.frz3.gene6	mh_7		mh_7	E
OG0006016	E	meloidogyne_hapla.PRJNA29083.WBPS14	transcript:MhA1_Contig1382.frz3.gene8	mh_16		mh_16	E
OG0006019	E	meloidogyne_hapla.PRJNA29083.WBPS14	transcript:MhA1_Contig1363.frz3.gene4	mh_MhA1_Contig1363		mh_MhA1_Contig1363	E
OG0006032	E	meloidogyne_hapla.PRJNA29083.WBPS14	transcript:MhA1_Contig1723.frz3.gene4	mh_16		mh_16	E
OG0006033	E	meloidogyne_hapla.PRJNA29083.WBPS14	transcript:MhA1_Contig347.frz3.gene8	mh_16		mh_16	E
OG0006039	E	meloidogyne_hapla.PRJNA29083.WBPS14	transcript:MhA1_Contig1860.frz3.gene11	mh_3		mh_3	E
OG0006040	E	meloidogyne_hapla.PRJNA29083.WBPS14	transcript:MhA1_Contig186.frz3.gene2	mh_MhA1_Contig186		mh_MhA1_Contig186	E
OG0006048	N	meloidogyne_hapla.PRJNA29083.WBPS14	transcript:MhA1_Contig3008.frz3.fgene1	mh_MhA1_Contig3008		mh_MhA1_Contig3008	N
OG0006052	N	meloidogyne_hapla.PRJNA29083.WBPS14	transcript:MhA1_Contig339.frz3.gene1	mh_2B		mh_2B	N
OG0006056	N	meloidogyne_hapla.PRJNA29083.WBPS14	transcript:MhA1_Contig970.frz3.gene13	mh_21		mh_21	N
OG0006059	N	meloidogyne_hapla.PRJNA29083.WBPS14	transcript:MhA1_Contig43.frz3.gene4	mh_4		mh_4	N
OG0006076	N	meloidogyne_hapla.PRJNA29083.WBPS14	transcript:MhA1_Contig193.frz3.gene13	mh_MhA1_Contig193		mh_MhA1_Contig193	N
OG0006078	C	meloidogyne_hapla.PRJNA29083.WBPS14	transcript:MhA1_Contig737.frz3.gene17	mh_13A.17		mh_13A.17	C
OG0006081	C	meloidogyne_hapla.PRJNA29083.WBPS14	transcript:MhA1_Contig139.frz3.gene9	mh_MhA1_Contig139		mh_MhA1_Contig139	C
OG0006091	C	meloidogyne_hapla.PRJNA29083.WBPS14	transcript:MhA1_Contig1556.frz3.gene24	mh_16		mh_16	C
OG0006096	C	meloidogyne_hapla.PRJNA29083.WBPS14	transcript:MhA1_Contig121.frz3.gene28	mh_11		mh_11	C
OG0006098	C	meloidogyne_hapla.PRJNA29083.WBPS14	transcript:MhA1_Contig271.frz3.gene9	mh_5		mh_5	C
OG0006099	C	meloidogyne_hapla.PRJNA29083.WBPS14	transcript:MhA1_Contig565.frz3.gene9	mh_14		mh_14	C
OG0006103	C	meloidogyne_hapla.PRJNA29083.WBPS14	transcript:MhA1_Contig147.frz3.gene58	mh_6		mh_6	C
OG0006110	C	meloidogyne_hapla.PRJNA29083.WBPS14	transcript:MhA1_Contig595.frz3.gene9	mh_1B		mh_1B	C
OG0006111	N	meloidogyne_hapla.PRJNA29083.WBPS14	transcript:MhA1_Contig822.frz3.gene4	mh_MhA1_Contig822		mh_MhA1_Contig822	N
OG0006120	N	meloidogyne_hapla.PRJNA29083.WBPS14	transcript:MhA1_Contig1597.frz3.gene11	mh_14		mh_14	N
OG0006122	C	meloidogyne_hapla.PRJNA29083.WBPS14	transcript:MhA1_Contig0.frz3.gene42	mh_15		mh_15	C
OG0006123	C	meloidogyne_hapla.PRJNA29083.WBPS14	transcript:MhA1_Contig964.frz3.gene4	mh_1A		mh_1A	C
OG0006124	C	meloidogyne_hapla.PRJNA29083.WBPS14	transcript:MhA1_Contig1437.frz3.gene9	mh_10.12.18		mh_10.12.18	C
OG0006125	C	meloidogyne_hapla.PRJNA29083.WBPS14	transcript:MhA1_Contig42.frz3.gene48	mh_4		mh_4	C
OG0006126	C	meloidogyne_hapla.PRJNA29083.WBPS14	transcript:MhA1_Contig179.frz3.gene15	mh_11		mh_11	C
OG0006127	C	meloidogyne_hapla.PRJNA29083.WBPS14	transcript:MhA1_Contig134.frz3.gene4	mh_6		mh_6	C
OG0006131	C	meloidogyne_hapla.PRJNA29083.WBPS14	transcript:MhA1_Contig42.frz3.gene23	mh_4		mh_4	C
OG0006134	N	meloidogyne_hapla.PRJNA29083.WBPS14	transcript:MhA1_Contig346.frz3.gene32	mh_16		mh_16	N
OG0006139	N	meloidogyne_hapla.PRJNA29083.WBPS14	transcript:MhA1_Contig1018.frz3.gene11	mh_11		mh_11	N
OG0006142	C	meloidogyne_hapla.PRJNA29083.WBPS14	transcript:MhA1_Contig1038.frz3.gene1	mh_MhA1_Contig1038		mh_MhA1_Contig1038	C
OG0006144	C	meloidogyne_hapla.PRJNA29083.WBPS14	transcript:MhA1_Contig468.frz3.gene25	mh_13A.17		mh_13A.17	C
OG0006145	C	meloidogyne_hapla.PRJNA29083.WBPS14	transcript:MhA1_Contig2033.frz3.gene1	mh_MhA1_Contig2033		mh_MhA1_Contig2033	C
OG0006148	C	meloidogyne_hapla.PRJNA29083.WBPS14	transcript:MhA1_Contig405.frz3.fgene3	mh_20		mh_20	C
OG0006149	C	meloidogyne_hapla.PRJNA29083.WBPS14	transcript:MhA1_Contig133.frz3.gene12	mh_6		mh_6	C
OG0006151	C	meloidogyne_hapla.PRJNA29083.WBPS14	transcript:MhA1_Contig722.frz3.gene13	mh_11		mh_11	C
OG0006152	C	meloidogyne_hapla.PRJNA29083.WBPS14	transcript:MhA1_Contig707.frz3.gene20	mh_MhA1_Contig707		mh_MhA1_Contig707	C
OG0006154	C	meloidogyne_hapla.PRJNA29083.WBPS14	transcript:MhA1_Contig133.frz3.gene31	mh_6		mh_6	C
OG0006156	C	meloidogyne_hapla.PRJNA29083.WBPS14	transcript:MhA1_Contig138.frz3.gene33	mh_3		mh_3	C
OG0006160	N	meloidogyne_hapla.PRJNA29083.WBPS14	transcript:MhA1_Contig2377.frz3.gene1	mh_MhA1_Contig2377		mh_MhA1_Contig2377	N
OG0006163	N	meloidogyne_hapla.PRJNA29083.WBPS14	transcript:MhA1_Contig806.frz3.gene5	mh_4		mh_4	N
OG0006175	N	meloidogyne_hapla.PRJNA29083.WBPS14	transcript:MhA1_Contig30.frz3.gene18	mh_1B		mh_1B	N
OG0006176	N	meloidogyne_hapla.PRJNA29083.WBPS14	transcript:MhA1_Contig1626.frz3.gene4	mh_3		mh_3	N
OG0006180	C	meloidogyne_hapla.PRJNA29083.WBPS14	transcript:MhA1_Contig45.frz3.gene4	mh_4		mh_4	C
OG0006184	C	meloidogyne_hapla.PRJNA29083.WBPS14	transcript:MhA1_Contig647.frz3.gene6	mh_1A		mh_1A	C
OG0006196	C	meloidogyne_hapla.PRJNA29083.WBPS14	transcript:MhA1_Contig3242.frz3.gene1	mh_MhA1_Contig3242		mh_MhA1_Contig3242	C
OG0006198	C	meloidogyne_hapla.PRJNA29083.WBPS14	transcript:MhA1_Contig2401.frz3.gene1	mh_MhA1_Contig2401		mh_MhA1_Contig2401	C
OG0006199	C	meloidogyne_hapla.PRJNA29083.WBPS14	transcript:MhA1_Contig2512.frz3.fgene1	mh_MhA1_Contig2512		mh_MhA1_Contig2512	C
OG0006202	C	meloidogyne_hapla.PRJNA29083.WBPS14	transcript:MhA1_Contig271.frz3.gene65	mh_5		mh_5	C
OG0006213	C	meloidogyne_hapla.PRJNA29083.WBPS14	transcript:MhA1_Contig1786.frz3.gene2	mh_7		mh_7	C
OG0006216	C	meloidogyne_hapla.PRJNA29083.WBPS14	transcript:MhA1_Contig1554.frz3.gene3	mh_MhA1_Contig1554		mh_MhA1_Contig1554	C
OG0006219	C	meloidogyne_hapla.PRJNA29083.WBPS14	transcript:MhA1_Contig1838.frz3.gene2	mh_11		mh_11	C
OG0006221	C	meloidogyne_hapla.PRJNA29083.WBPS14	transcript:MhA1_Contig915.frz3.gene11	mh_4		mh_4	C
OG0006224	C	meloidogyne_hapla.PRJNA29083.WBPS14	transcript:MhA1_Contig20.frz3.gene52	mh_2A		mh_2A	C
OG0006227	C	meloidogyne_hapla.PRJNA29083.WBPS14	transcript:MhA1_Contig803.frz3.gene2	mh_16		mh_16	C
OG0006228	C	meloidogyne_hapla.PRJNA29083.WBPS14	transcript:MhA1_Contig737.frz3.fgene3	mh_13A.17		mh_13A.17	C
OG0006231	C	meloidogyne_hapla.PRJNA29083.WBPS14	transcript:MhA1_Contig96.frz3.gene2	mh_3		mh_3	C
OG0006234	C	meloidogyne_hapla.PRJNA29083.WBPS14	transcript:MhA1_Contig1056.frz3.gene5	mh_MhA1_Contig1056		mh_MhA1_Contig1056	C
OG0006235	C	meloidogyne_hapla.PRJNA29083.WBPS14	transcript:MhA1_Contig2401.frz3.gene2	mh_MhA1_Contig2401		mh_MhA1_Contig2401	C
OG0006240	A	meloidogyne_hapla.PRJNA29083.WBPS14	transcript:MhA1_Contig75.frz3.gene5	mh_1B		mh_1B	A
OG0006241	A	meloidogyne_hapla.PRJNA29083.WBPS14	transcript:MhA1_Contig183.frz3.gene1	mh_MhA1_Contig183		mh_MhA1_Contig183	A
OG0006242	A	meloidogyne_hapla.PRJNA29083.WBPS14	transcript:MhA1_Contig334.frz3.gene34	mh_7		mh_7	A
OG0006244	A	meloidogyne_hapla.PRJNA29083.WBPS14	transcript:MhA1_Contig2940.frz3.gene6	mh_1A		mh_1A	A
OG0006246	A	meloidogyne_hapla.PRJNA29083.WBPS14	transcript:MhA1_Contig462.frz3.gene3	mh_4		mh_4	A
OG0006249	A	meloidogyne_hapla.PRJNA29083.WBPS14	transcript:MhA1_Contig354.frz3.fgene5	mh_3		mh_3	A
OG0006253	A	meloidogyne_hapla.PRJNA29083.WBPS14	transcript:MhA1_Contig786.frz3.fgene1	mh_MhA1_Contig786		mh_MhA1_Contig786	A
OG0006256	A	meloidogyne_hapla.PRJNA29083.WBPS14	transcript:MhA1_Contig783.frz3.gene12	mh_4		mh_4	A
OG0006259	A	meloidogyne_hapla.PRJNA29083.WBPS14	transcript:MhA1_Contig1437.frz3.gene8	mh_10.12.18		mh_10.12.18	A
OG0006260	A	meloidogyne_hapla.PRJNA29083.WBPS14	transcript:MhA1_Contig455.frz3.gene6	mh_4		mh_4	A
OG0006264	A	meloidogyne_hapla.PRJNA29083.WBPS14	transcript:MhA1_Contig214.frz3.fgene2	mh_MhA1_Contig214		mh_MhA1_Contig214	A
OG0006266	A	meloidogyne_hapla.PRJNA29083.WBPS14	transcript:MhA1_Contig923.frz3.gene8	mh_8		mh_8	A
OG0006267	A	meloidogyne_hapla.PRJNA29083.WBPS14	transcript:MhA1_Contig437.frz3.gene2	mh_MhA1_Contig437		mh_MhA1_Contig437	A
OG0006276	A	meloidogyne_hapla.PRJNA29083.WBPS14	transcript:MhA1_Contig76.frz3.gene6	mh_1B		mh_1B	A
OG0006277	A	meloidogyne_hapla.PRJNA29083.WBPS14	transcript:MhA1_Contig488.frz3.gene3	mh_1A		mh_1A	A
OG0006278	A	meloidogyne_hapla.PRJNA29083.WBPS14	transcript:MhA1_Contig26.frz3.gene13	mh_1B		mh_1B	A
OG0006280	A	meloidogyne_hapla.PRJNA29083.WBPS14	transcript:MhA1_Contig781.frz3.gene16	mh_13A.17		mh_13A.17	A
OG0006282	A	meloidogyne_hapla.PRJNA29083.WBPS14	transcript:MhA1_Contig647.frz3.gene10	mh_1A		mh_1A	A
OG0006285	A	meloidogyne_hapla.PRJNA29083.WBPS14	transcript:MhA1_Contig91.frz3.gene15	mh_13A.17		mh_13A.17	A
OG0006286	A	meloidogyne_hapla.PRJNA29083.WBPS14	transcript:MhA1_Contig353.frz3.gene46	mh_13B		mh_13B	A
OG0006293	A	meloidogyne_hapla.PRJNA29083.WBPS14	transcript:MhA1_Contig627.frz3.gene1	mh_1A		mh_1A	A
OG0006294	A	meloidogyne_hapla.PRJNA29083.WBPS14	transcript:MhA1_Contig354.frz3.fgene4	mh_3		mh_3	A
OG0006295	A	meloidogyne_hapla.PRJNA29083.WBPS14	transcript:MhA1_Contig593.frz3.gene9	mh_1B		mh_1B	A
OG0006301	A	meloidogyne_hapla.PRJNA29083.WBPS14	transcript:MhA1_Contig849.frz3.gene7	mh_13A.17		mh_13A.17	A
OG0006304	A	meloidogyne_hapla.PRJNA29083.WBPS14	transcript:MhA1_Contig484.frz3.gene29	mh_1A		mh_1A	A
OG0006308	A	meloidogyne_hapla.PRJNA29083.WBPS14	transcript:MhA1_Contig53.frz3.gene15	mh_1B		mh_1B	A
OG0006309	A	meloidogyne_hapla.PRJNA29083.WBPS14	transcript:MhA1_Contig336.frz3.gene4	mh_MhA1_Contig336		mh_MhA1_Contig336	A
OG0006310	A	meloidogyne_hapla.PRJNA29083.WBPS14	transcript:MhA1_Contig700.frz3.fgene1	mh_7		mh_7	A
OG0006312	A	meloidogyne_hapla.PRJNA29083.WBPS14	transcript:MhA1_Contig290.frz3.gene17	mh_13A.17		mh_13A.17	A
OG0006315	A	meloidogyne_hapla.PRJNA29083.WBPS14	transcript:MhA1_Contig0.frz3.gene16	mh_15		mh_15	A
OG0006318	A	meloidogyne_hapla.PRJNA29083.WBPS14	transcript:MhA1_Contig1361.frz3.gene8	mh_1A		mh_1A	A
OG0006323	C	meloidogyne_hapla.PRJNA29083.WBPS14	transcript:MhA1_Contig1921.frz3.gene1	mh_3		mh_3	C
OG0006324	C	meloidogyne_hapla.PRJNA29083.WBPS14	transcript:MhA1_Contig1243.frz3.gene10	mh_8		mh_8	C
OG0006328	C	meloidogyne_hapla.PRJNA29083.WBPS14	transcript:MhA1_Contig354.frz3.gene50	mh_3		mh_3	C
OG0006331	C	meloidogyne_hapla.PRJNA29083.WBPS14	transcript:MhA1_Contig541.frz3.fgene2	mh_4		mh_4	C
OG0006332	A	meloidogyne_hapla.PRJNA29083.WBPS14	transcript:MhA1_Contig7.frz3.gene17	mh_15		mh_15	A
OG0006334	A	meloidogyne_hapla.PRJNA29083.WBPS14	transcript:MhA1_Contig658.frz3.gene9	mh_MhA1_Contig658		mh_MhA1_Contig658	A
OG0006335	A	meloidogyne_hapla.PRJNA29083.WBPS14	transcript:MhA1_Contig1332.frz3.gene7	mh_MhA1_Contig1332		mh_MhA1_Contig1332	A
OG0006339	A	meloidogyne_hapla.PRJNA29083.WBPS14	transcript:MhA1_Contig1429.frz3.fgene1	mh_13A.17		mh_13A.17	A
OG0006340	A	meloidogyne_hapla.PRJNA29083.WBPS14	transcript:MhA1_Contig990.frz3.fgene2	mh_1A		mh_1A	A
OG0006341	A	meloidogyne_hapla.PRJNA29083.WBPS14	transcript:MhA1_Contig1358.frz3.gene5	mh_MhA1_Contig1358		mh_MhA1_Contig1358	A
OG0006342	A	meloidogyne_hapla.PRJNA29083.WBPS14	transcript:MhA1_Contig1622.frz3.gene1	mh_MhA1_Contig1622		mh_MhA1_Contig1622	A
OG0006345	A	meloidogyne_hapla.PRJNA29083.WBPS14	transcript:MhA1_Contig205.frz3.gene11	mh_21		mh_21	A
OG0006346	A	meloidogyne_hapla.PRJNA29083.WBPS14	transcript:MhA1_Contig898.frz3.gene14	mh_1B		mh_1B	A
OG0006348	A	meloidogyne_hapla.PRJNA29083.WBPS14	transcript:MhA1_Contig130.frz3.gene33	mh_13A.17		mh_13A.17	A
OG0006349	A	meloidogyne_hapla.PRJNA29083.WBPS14	transcript:MhA1_Contig593.frz3.gene4	mh_1B		mh_1B	A
OG0006350	A	meloidogyne_hapla.PRJNA29083.WBPS14	transcript:MhA1_Contig819.frz3.gene6	mh_1A		mh_1A	A
OG0006351	A	meloidogyne_hapla.PRJNA29083.WBPS14	transcript:MhA1_Contig756.frz3.gene8	mh_21		mh_21	A
OG0006352	A	meloidogyne_hapla.PRJNA29083.WBPS14	transcript:MhA1_Contig1358.frz3.gene2	mh_MhA1_Contig1358		mh_MhA1_Contig1358	A
OG0006354	A	meloidogyne_hapla.PRJNA29083.WBPS14	transcript:MhA1_Contig1514.frz3.gene2	mh_13A.17		mh_13A.17	A
OG0006355	A	meloidogyne_hapla.PRJNA29083.WBPS14	transcript:MhA1_Contig2276.frz3.gene2	mh_MhA1_Contig2276		mh_MhA1_Contig2276	A
OG0006364	A	meloidogyne_hapla.PRJNA29083.WBPS14	transcript:MhA1_Contig1870.frz3.gene1	mh_7		mh_7	A
OG0006368	A	meloidogyne_hapla.PRJNA29083.WBPS14	transcript:MhA1_Contig155.frz3.gene4	mh_21		mh_21	A
OG0006375	A	meloidogyne_hapla.PRJNA29083.WBPS14	transcript:MhA1_Contig656.frz3.gene18	mh_10.12.18		mh_10.12.18	A
OG0006377	C	meloidogyne_hapla.PRJNA29083.WBPS14	transcript:MhA1_Contig805.frz3.gene4	mh_4		mh_4	C
OG0006378	A	meloidogyne_hapla.PRJNA29083.WBPS14	transcript:MhA1_Contig878.frz3.gene2	mh_2A		mh_2A	A
OG0006384	N	meloidogyne_hapla.PRJNA29083.WBPS14	transcript:MhA1_Contig656.frz3.gene7	mh_10.12.18		mh_10.12.18	N
OG0006389	C	meloidogyne_hapla.PRJNA29083.WBPS14	transcript:MhA1_Contig121.frz3.fgene7	mh_11		mh_11	C
OG0006390	C	meloidogyne_hapla.PRJNA29083.WBPS14	transcript:MhA1_Contig1688.frz3.gene3	mh_MhA1_Contig1688		mh_MhA1_Contig1688	C
OG0006394	C	meloidogyne_hapla.PRJNA29083.WBPS14	transcript:MhA1_Contig999.frz3.gene3	mh_3		mh_3	C
OG0006395	C	meloidogyne_hapla.PRJNA29083.WBPS14	transcript:MhA1_Contig232.frz3.gene17	mh_10.12.18		mh_10.12.18	C
OG0006396	C	meloidogyne_hapla.PRJNA29083.WBPS14	transcript:MhA1_Contig914.frz3.fgene1	mh_16		mh_16	C
OG0006397	C	meloidogyne_hapla.PRJNA29083.WBPS14	transcript:MhA1_Contig117.frz3.gene8	mh_4		mh_4	C
OG0006400	C	meloidogyne_hapla.PRJNA29083.WBPS14	transcript:MhA1_Contig660.frz3.gene1	mh_MhA1_Contig660		mh_MhA1_Contig660	C
OG0006401	C	meloidogyne_hapla.PRJNA29083.WBPS14	transcript:MhA1_Contig660.frz3.gene6	mh_MhA1_Contig660		mh_MhA1_Contig660	C
OG0006407	C	meloidogyne_hapla.PRJNA29083.WBPS14	transcript:MhA1_Contig1201.frz3.gene8	mh_MhA1_Contig1201		mh_MhA1_Contig1201	C
OG0006408	C	meloidogyne_hapla.PRJNA29083.WBPS14	transcript:MhA1_Contig47.frz3.gene5	mh_MhA1_Contig47		mh_MhA1_Contig47	C
OG0006409	C	meloidogyne_hapla.PRJNA29083.WBPS14	transcript:MhA1_Contig953.frz3.gene22	mh_7		mh_7	C
OG0006412	C	meloidogyne_hapla.PRJNA29083.WBPS14	transcript:MhA1_Contig14.frz3.gene27	mh_2A		mh_2A	C
OG0006413	C	meloidogyne_hapla.PRJNA29083.WBPS14	transcript:MhA1_Contig1238.frz3.gene12	mh_13A.17		mh_13A.17	C
OG0006415	C	meloidogyne_hapla.PRJNA29083.WBPS14	transcript:MhA1_Contig1025.frz3.gene7	mh_10.12.18		mh_10.12.18	C
OG0006416	A	meloidogyne_hapla.PRJNA29083.WBPS14	transcript:MhA1_Contig1697.frz3.fgene1	mh_MhA1_Contig1697		mh_MhA1_Contig1697	A
OG0006419	A	meloidogyne_hapla.PRJNA29083.WBPS14	transcript:MhA1_Contig258.frz3.gene11	mh_2B		mh_2B	A
OG0006422	A	meloidogyne_hapla.PRJNA29083.WBPS14	transcript:MhA1_Contig656.frz3.gene15	mh_10.12.18		mh_10.12.18	A
OG0006423	A	meloidogyne_hapla.PRJNA29083.WBPS14	transcript:MhA1_Contig233.frz3.gene4	mh_MhA1_Contig233		mh_MhA1_Contig233	A
OG0006425	A	meloidogyne_hapla.PRJNA29083.WBPS14	transcript:MhA1_Contig131.frz3.gene11	mh_MhA1_Contig131		mh_MhA1_Contig131	A
OG0006428	A	meloidogyne_hapla.PRJNA29083.WBPS14	transcript:MhA1_Contig1144.frz3.gene5	mh_MhA1_Contig1144		mh_MhA1_Contig1144	A
OG0006431	C	meloidogyne_hapla.PRJNA29083.WBPS14	transcript:MhA1_Contig121.frz3.gene11	mh_11		mh_11	C
OG0006434	A	meloidogyne_hapla.PRJNA29083.WBPS14	transcript:MhA1_Contig990.frz3.gene8	mh_1A		mh_1A	A
OG0006435	A	meloidogyne_hapla.PRJNA29083.WBPS14	transcript:MhA1_Contig990.frz3.gene7	mh_1A		mh_1A	A
OG0006437	A	meloidogyne_hapla.PRJNA29083.WBPS14	transcript:MhA1_Contig599.frz3.gene32	mh_13A.17		mh_13A.17	A
OG0006439	A	meloidogyne_hapla.PRJNA29083.WBPS14	transcript:MhA1_Contig1140.frz3.gene7	mh_7		mh_7	A
OG0006442	A	meloidogyne_hapla.PRJNA29083.WBPS14	transcript:MhA1_Contig1708.frz3.gene10	mh_4		mh_4	A
OG0006443	A	meloidogyne_hapla.PRJNA29083.WBPS14	transcript:MhA1_Contig69.frz3.fgene1	mh_1B		mh_1B	A
OG0006444	C	meloidogyne_hapla.PRJNA29083.WBPS14	transcript:MhA1_Contig137.frz3.gene8	mh_3		mh_3	C
OG0006445	C	meloidogyne_hapla.PRJNA29083.WBPS14	transcript:MhA1_Contig595.frz3.gene8	mh_1B		mh_1B	C
OG0006446	C	meloidogyne_hapla.PRJNA29083.WBPS14	transcript:MhA1_Contig1243.frz3.gene7	mh_8		mh_8	C
OG0006452	A	meloidogyne_hapla.PRJNA29083.WBPS14	transcript:MhA1_Contig70.frz3.gene35	mh_1B		mh_1B	A
OG0006456	C	meloidogyne_hapla.PRJNA29083.WBPS14	transcript:MhA1_Contig147.frz3.gene61	mh_6		mh_6	C
OG0006457	A	meloidogyne_hapla.PRJNA29083.WBPS14	transcript:MhA1_Contig655.frz3.gene1	mh_MhA1_Contig655		mh_MhA1_Contig655	A
OG0006459	A	meloidogyne_hapla.PRJNA29083.WBPS14	transcript:MhA1_Contig76.frz3.gene1	mh_1B		mh_1B	A
OG0006460	A	meloidogyne_hapla.PRJNA29083.WBPS14	transcript:MhA1_Contig123.frz3.gene104	mh_13A.17		mh_13A.17	A
OG0006464	A	meloidogyne_hapla.PRJNA29083.WBPS14	transcript:MhA1_Contig596.frz3.gene26	mh_MhA1_Contig596		mh_MhA1_Contig596	A
OG0006465	A	meloidogyne_hapla.PRJNA29083.WBPS14	transcript:MhA1_Contig630.frz3.fgene1	mh_1A		mh_1A	A
OG0006467	A	meloidogyne_hapla.PRJNA29083.WBPS14	transcript:MhA1_Contig91.frz3.gene47	mh_13A.17		mh_13A.17	A
OG0006469	A	meloidogyne_hapla.PRJNA29083.WBPS14	transcript:MhA1_Contig1131.frz3.gene7	mh_10.12.18		mh_10.12.18	A
OG0006471	A	meloidogyne_hapla.PRJNA29083.WBPS14	transcript:MhA1_Contig593.frz3.gene1	mh_1B		mh_1B	A
OG0006477	N	meloidogyne_hapla.PRJNA29083.WBPS14	transcript:MhA1_Contig319.frz3.fgene2	mh_11		mh_11	N
OG0006483	N	meloidogyne_hapla.PRJNA29083.WBPS14	transcript:MhA1_Contig817.frz3.gene1	mh_MhA1_Contig817		mh_MhA1_Contig817	N
OG0006484	N	meloidogyne_hapla.PRJNA29083.WBPS14	transcript:MhA1_Contig2194.frz3.gene4	mh_1A		mh_1A	N
OG0006493	N	meloidogyne_hapla.PRJNA29083.WBPS14	transcript:MhA1_Contig898.frz3.gene13	mh_1B		mh_1B	N
OG0006510	N	meloidogyne_hapla.PRJNA29083.WBPS14	transcript:MhA1_Contig2224.frz3.gene1	mh_3		mh_3	N
OG0006514	N	meloidogyne_hapla.PRJNA29083.WBPS14	transcript:MhA1_Contig740.frz3.gene17	mh_10.12.18		mh_10.12.18	N
OG0006518	C	meloidogyne_hapla.PRJNA29083.WBPS14	transcript:MhA1_Contig45.frz3.gene17	mh_4		mh_4	C
OG0006520	A	meloidogyne_hapla.PRJNA29083.WBPS14	transcript:MhA1_Contig819.frz3.gene21	mh_1A		mh_1A	A
OG0006522	A	meloidogyne_hapla.PRJNA29083.WBPS14	transcript:MhA1_Contig262.frz3.gene23	mh_MhA1_Contig262		mh_MhA1_Contig262	A
OG0006523	A	meloidogyne_hapla.PRJNA29083.WBPS14	transcript:MhA1_Contig754.frz3.gene8	mh_2A		mh_2A	A
OG0006531	A	meloidogyne_hapla.PRJNA29083.WBPS14	transcript:MhA1_Contig309.frz3.gene5	mh_16		mh_16	A
OG0006539	A	meloidogyne_hapla.PRJNA29083.WBPS14	transcript:MhA1_Contig56.frz3.gene10	mh_1B		mh_1B	A
OG0006540	C	meloidogyne_hapla.PRJNA29083.WBPS14	transcript:MhA1_Contig302.frz3.gene3	mh_4		mh_4	C
OG0006546	X	meloidogyne_hapla.PRJNA29083.WBPS14	transcript:MhA1_Contig147.frz3.gene98	mh_6		mh_6	X
OG0006555	X	meloidogyne_hapla.PRJNA29083.WBPS14	transcript:MhA1_Contig142.frz3.gene11	mh_6		mh_6	X
OG0006557	X	meloidogyne_hapla.PRJNA29083.WBPS14	transcript:MhA1_Contig1972.frz3.gene5	mh_MhA1_Contig1972		mh_MhA1_Contig1972	X
OG0006562	X	meloidogyne_hapla.PRJNA29083.WBPS14	transcript:MhA1_Contig649.frz3.gene7	mh_8		mh_8	X
OG0006565	X	meloidogyne_hapla.PRJNA29083.WBPS14	transcript:MhA1_Contig1149.frz3.gene11	mh_8		mh_8	X
OG0006566	X	meloidogyne_hapla.PRJNA29083.WBPS14	transcript:MhA1_Contig0.frz3.gene7	mh_15		mh_15	X
OG0006567	X	meloidogyne_hapla.PRJNA29083.WBPS14	transcript:MhA1_Contig2856.frz3.gene1	mh_MhA1_Contig2856		mh_MhA1_Contig2856	X
OG0006571	X	meloidogyne_hapla.PRJNA29083.WBPS14	transcript:MhA1_Contig342.frz3.gene56	mh_3		mh_3	X
OG0006578	X	meloidogyne_hapla.PRJNA29083.WBPS14	transcript:MhA1_Contig1884.frz3.gene4	mh_13A.17		mh_13A.17	X
OG0006581	X	meloidogyne_hapla.PRJNA29083.WBPS14	transcript:MhA1_Contig134.frz3.gene46	mh_6		mh_6	X
OG0006583	X	meloidogyne_hapla.PRJNA29083.WBPS14	transcript:MhA1_Contig2113.frz3.gene1	mh_8		mh_8	X
OG0006589	D	meloidogyne_hapla.PRJNA29083.WBPS14	transcript:MhA1_Contig580.frz3.gene9	mh_MhA1_Contig580		mh_MhA1_Contig580	D
OG0006591	D	meloidogyne_hapla.PRJNA29083.WBPS14	transcript:MhA1_Contig769.frz3.gene2	mh_MhA1_Contig769		mh_MhA1_Contig769	D
OG0006599	D	meloidogyne_hapla.PRJNA29083.WBPS14	transcript:MhA1_Contig530.frz3.fgene2	mh_2B		mh_2B	D
OG0006601	D	meloidogyne_hapla.PRJNA29083.WBPS14	transcript:MhA1_Contig11.frz3.gene15	mh_2A		mh_2A	D
OG0006602	D	meloidogyne_hapla.PRJNA29083.WBPS14	transcript:MhA1_Contig108.frz3.gene60	mh_13B		mh_13B	D
OG0006603	A	meloidogyne_hapla.PRJNA29083.WBPS14	transcript:MhA1_Contig1023.frz3.gene9	mh_MhA1_Contig1023		mh_MhA1_Contig1023	A
OG0006610	D	meloidogyne_hapla.PRJNA29083.WBPS14	transcript:MhA1_Contig256.frz3.gene21	mh_13A.17		mh_13A.17	D
OG0006611	D	meloidogyne_hapla.PRJNA29083.WBPS14	transcript:MhA1_Contig841.frz3.gene11	mh_13A.17		mh_13A.17	D
OG0006613	D	meloidogyne_hapla.PRJNA29083.WBPS14	transcript:MhA1_Contig754.frz3.gene9	mh_2A		mh_2A	D
OG0006615	D	meloidogyne_hapla.PRJNA29083.WBPS14	transcript:MhA1_Contig342.frz3.fgene2	mh_3		mh_3	D
OG0006628	D	meloidogyne_hapla.PRJNA29083.WBPS14	transcript:MhA1_Contig1561.frz3.gene10	mh_MhA1_Contig1561		mh_MhA1_Contig1561	D
OG0006630	D	meloidogyne_hapla.PRJNA29083.WBPS14	transcript:MhA1_Contig809.frz3.gene15	mh_3		mh_3	D
OG0006632	D	meloidogyne_hapla.PRJNA29083.WBPS14	transcript:MhA1_Contig2102.frz3.gene7	mh_13A.17		mh_13A.17	D
OG0006635	D	meloidogyne_hapla.PRJNA29083.WBPS14	transcript:MhA1_Contig107.frz3.gene32	mh_13B		mh_13B	D
OG0006638	D	meloidogyne_hapla.PRJNA29083.WBPS14	transcript:MhA1_Contig255.frz3.gene24	mh_13A.17		mh_13A.17	D
OG0006643	D	meloidogyne_hapla.PRJNA29083.WBPS14	transcript:MhA1_Contig108.frz3.fgene2	mh_13B		mh_13B	D
OG0006647	D	meloidogyne_hapla.PRJNA29083.WBPS14	transcript:MhA1_Contig989.frz3.gene2	mh_MhA1_Contig989		mh_MhA1_Contig989	D
OG0006658	D	meloidogyne_hapla.PRJNA29083.WBPS14	transcript:MhA1_Contig1978.frz3.gene1	mh_MhA1_Contig1978		mh_MhA1_Contig1978	D
OG0006661	D	meloidogyne_hapla.PRJNA29083.WBPS14	transcript:MhA1_Contig127.frz3.gene60	mh_5		mh_5	D
OG0006670	D	meloidogyne_hapla.PRJNA29083.WBPS14	transcript:MhA1_Contig271.frz3.gene14	mh_5		mh_5	D
OG0006679	D	meloidogyne_hapla.PRJNA29083.WBPS14	transcript:MhA1_Contig239.frz3.gene14	mh_11		mh_11	D
OG0006681	D	meloidogyne_hapla.PRJNA29083.WBPS14	transcript:MhA1_Contig1245.frz3.gene5	mh_14		mh_14	D
OG0006686	D	meloidogyne_hapla.PRJNA29083.WBPS14	transcript:MhA1_Contig333.frz3.fgene1	mh_13A.17		mh_13A.17	D
OG0006687	D	meloidogyne_hapla.PRJNA29083.WBPS14	transcript:MhA1_Contig1161.frz3.gene10	mh_5		mh_5	D
OG0006694	D	meloidogyne_hapla.PRJNA29083.WBPS14	transcript:MhA1_Contig914.frz3.gene12	mh_16		mh_16	D
OG0006696	D	meloidogyne_hapla.PRJNA29083.WBPS14	transcript:MhA1_Contig2507.frz3.gene1	mh_2B		mh_2B	D
OG0006700	D	meloidogyne_hapla.PRJNA29083.WBPS14	transcript:MhA1_Contig1474.frz3.gene5	mh_4		mh_4	D
OG0006704	D	meloidogyne_hapla.PRJNA29083.WBPS14	transcript:MhA1_Contig532.frz3.gene2	mh_2B		mh_2B	D
OG0006708	D	meloidogyne_hapla.PRJNA29083.WBPS14	transcript:MhA1_Contig1431.frz3.fgene2	mh_7		mh_7	D
OG0006713	D	meloidogyne_hapla.PRJNA29083.WBPS14	transcript:MhA1_Contig163.frz3.gene35	mh_13A.17		mh_13A.17	D
OG0006716	D	meloidogyne_hapla.PRJNA29083.WBPS14	transcript:MhA1_Contig1708.frz3.fgene1	mh_4		mh_4	D
OG0006717	D	meloidogyne_hapla.PRJNA29083.WBPS14	transcript:MhA1_Contig127.frz3.gene58	mh_5		mh_5	D
OG0006718	D	meloidogyne_hapla.PRJNA29083.WBPS14	transcript:MhA1_Contig127.frz3.gene57	mh_5		mh_5	D
OG0006719	D	meloidogyne_hapla.PRJNA29083.WBPS14	transcript:MhA1_Contig1400.frz3.gene8	mh_13A.17		mh_13A.17	D
OG0006721	D	meloidogyne_hapla.PRJNA29083.WBPS14	transcript:MhA1_Contig14.frz3.gene9	mh_2A		mh_2A	D
OG0006725	D	meloidogyne_hapla.PRJNA29083.WBPS14	transcript:MhA1_Contig1604.frz3.gene5	mh_MhA1_Contig1604		mh_MhA1_Contig1604	D
OG0006729	B	meloidogyne_hapla.PRJNA29083.WBPS14	transcript:MhA1_Contig1691.frz3.gene4	mh_2A		mh_2A	B
OG0006732	B	meloidogyne_hapla.PRJNA29083.WBPS14	transcript:MhA1_Contig772.frz3.gene4	mh_MhA1_Contig772		mh_MhA1_Contig772	B
OG0006735	B	meloidogyne_hapla.PRJNA29083.WBPS14	transcript:MhA1_Contig2086.frz3.gene4	mh_MhA1_Contig2086		mh_MhA1_Contig2086	B
OG0006737	B	meloidogyne_hapla.PRJNA29083.WBPS14	transcript:MhA1_Contig1858.frz3.gene4	mh_3		mh_3	B
OG0006738	B	meloidogyne_hapla.PRJNA29083.WBPS14	transcript:MhA1_Contig770.frz3.gene6	mh_13A.17		mh_13A.17	B
OG0006745	B	meloidogyne_hapla.PRJNA29083.WBPS14	transcript:MhA1_Contig214.frz3.gene1	mh_MhA1_Contig214		mh_MhA1_Contig214	B
OG0006747	B	meloidogyne_hapla.PRJNA29083.WBPS14	transcript:MhA1_Contig168.frz3.gene17	mh_1A		mh_1A	B
OG0006750	B	meloidogyne_hapla.PRJNA29083.WBPS14	transcript:MhA1_Contig1606.frz3.gene6	mh_2B		mh_2B	B
OG0006751	B	meloidogyne_hapla.PRJNA29083.WBPS14	transcript:MhA1_Contig468.frz3.gene2	mh_13A.17		mh_13A.17	B
OG0006763	B	meloidogyne_hapla.PRJNA29083.WBPS14	transcript:MhA1_Contig418.frz3.gene5	mh_2B		mh_2B	B
OG0006770	B	meloidogyne_hapla.PRJNA29083.WBPS14	transcript:MhA1_Contig132.frz3.gene9	mh_13A.17		mh_13A.17	B
OG0006773	B	meloidogyne_hapla.PRJNA29083.WBPS14	transcript:MhA1_Contig409.frz3.gene4	mh_MhA1_Contig409		mh_MhA1_Contig409	B
OG0006777	B	meloidogyne_hapla.PRJNA29083.WBPS14	transcript:MhA1_Contig648.frz3.gene15	mh_1A		mh_1A	B
OG0006779	B	meloidogyne_hapla.PRJNA29083.WBPS14	transcript:MhA1_Contig1499.frz3.gene4	mh_MhA1_Contig1499		mh_MhA1_Contig1499	B
OG0006782	B	meloidogyne_hapla.PRJNA29083.WBPS14	transcript:MhA1_Contig55.frz3.gene23	mh_MhA1_Contig55		mh_MhA1_Contig55	B
OG0006785	B	meloidogyne_hapla.PRJNA29083.WBPS14	transcript:MhA1_Contig800.frz3.gene7	mh_5		mh_5	B
OG0006787	B	meloidogyne_hapla.PRJNA29083.WBPS14	transcript:MhA1_Contig2035.frz3.gene7	mh_5		mh_5	B
OG0006789	B	meloidogyne_hapla.PRJNA29083.WBPS14	transcript:MhA1_Contig2307.frz3.fgene1	mh_MhA1_Contig2307		mh_MhA1_Contig2307	B
OG0006792	B	meloidogyne_hapla.PRJNA29083.WBPS14	transcript:MhA1_Contig410.frz3.gene15	mh_2B		mh_2B	B
OG0006793	B	meloidogyne_hapla.PRJNA29083.WBPS14	transcript:MhA1_Contig2321.frz3.gene1	mh_MhA1_Contig2321		mh_MhA1_Contig2321	B
OG0006795	B	meloidogyne_hapla.PRJNA29083.WBPS14	transcript:MhA1_Contig510.frz3.gene10	mh_5		mh_5	B
OG0006800	B	meloidogyne_hapla.PRJNA29083.WBPS14	transcript:MhA1_Contig2342.frz3.gene6	mh_2A		mh_2A	B
OG0006809	B	meloidogyne_hapla.PRJNA29083.WBPS14	transcript:MhA1_Contig2087.frz3.gene9	mh_2A		mh_2A	B
OG0006810	B	meloidogyne_hapla.PRJNA29083.WBPS14	transcript:MhA1_Contig2030.frz3.gene2	mh_MhA1_Contig2030		mh_MhA1_Contig2030	B
OG0006811	B	meloidogyne_hapla.PRJNA29083.WBPS14	transcript:MhA1_Contig1078.frz3.gene6	mh_1A		mh_1A	B
OG0006816	B	meloidogyne_hapla.PRJNA29083.WBPS14	transcript:MhA1_Contig1689.frz3.gene10	mh_2B		mh_2B	B
OG0006820	B	meloidogyne_hapla.PRJNA29083.WBPS14	transcript:MhA1_Contig132.frz3.gene11	mh_13A.17		mh_13A.17	B
OG0006821	B	meloidogyne_hapla.PRJNA29083.WBPS14	transcript:MhA1_Contig2458.frz3.gene3	mh_MhA1_Contig2458		mh_MhA1_Contig2458	B
OG0006824	B	meloidogyne_hapla.PRJNA29083.WBPS14	transcript:MhA1_Contig809.frz3.gene21	mh_3		mh_3	B
OG0006825	B	meloidogyne_hapla.PRJNA29083.WBPS14	transcript:MhA1_Contig1763.frz3.gene6	mh_2A		mh_2A	B
OG0006834	B	meloidogyne_hapla.PRJNA29083.WBPS14	transcript:MhA1_Contig407.frz3.gene3	mh_2B		mh_2B	B
OG0006837	B	meloidogyne_hapla.PRJNA29083.WBPS14	transcript:MhA1_Contig1979.frz3.gene5	mh_MhA1_Contig1979		mh_MhA1_Contig1979	B
OG0006840	B	meloidogyne_hapla.PRJNA29083.WBPS14	transcript:MhA1_Contig912.frz3.gene21	mh_16		mh_16	B
OG0006841	B	meloidogyne_hapla.PRJNA29083.WBPS14	transcript:MhA1_Contig1051.frz3.gene19	mh_10.12.18		mh_10.12.18	B
OG0006846	B	meloidogyne_hapla.PRJNA29083.WBPS14	transcript:MhA1_Contig840.frz3.gene6	mh_1B		mh_1B	B
OG0006849	B	meloidogyne_hapla.PRJNA29083.WBPS14	transcript:MhA1_Contig70.frz3.gene8	mh_1B		mh_1B	B
OG0006856	B	meloidogyne_hapla.PRJNA29083.WBPS14	transcript:MhA1_Contig510.frz3.gene1	mh_5		mh_5	B
OG0006858	B	meloidogyne_hapla.PRJNA29083.WBPS14	transcript:MhA1_Contig284.frz3.fgene1	mh_5		mh_5	B
OG0006868	B	meloidogyne_hapla.PRJNA29083.WBPS14	transcript:MhA1_Contig1803.frz3.gene4	mh_MhA1_Contig1803		mh_MhA1_Contig1803	B
OG0006871	B	meloidogyne_hapla.PRJNA29083.WBPS14	transcript:MhA1_Contig840.frz3.fgene1	mh_1B		mh_1B	B
OG0006874	B	meloidogyne_hapla.PRJNA29083.WBPS14	transcript:MhA1_Contig316.frz3.gene3	mh_5		mh_5	B
OG0006875	B	meloidogyne_hapla.PRJNA29083.WBPS14	transcript:MhA1_Contig773.frz3.gene4	mh_16		mh_16	B
OG0006879	B	meloidogyne_hapla.PRJNA29083.WBPS14	transcript:MhA1_Contig53.frz3.gene8	mh_1B		mh_1B	B
OG0006882	B	meloidogyne_hapla.PRJNA29083.WBPS14	transcript:MhA1_Contig1097.frz3.gene7	mh_3		mh_3	B
OG0006890	B	meloidogyne_hapla.PRJNA29083.WBPS14	transcript:MhA1_Contig1679.frz3.gene5	mh_MhA1_Contig1679		mh_MhA1_Contig1679	B
OG0006893	A	meloidogyne_hapla.PRJNA29083.WBPS14	transcript:MhA1_Contig1174.frz3.gene13	mh_MhA1_Contig1174		mh_MhA1_Contig1174	A
OG0006899	A	meloidogyne_hapla.PRJNA29083.WBPS14	transcript:MhA1_Contig855.frz3.gene16	mh_MhA1_Contig855		mh_MhA1_Contig855	A
OG0006902	A	meloidogyne_hapla.PRJNA29083.WBPS14	transcript:MhA1_Contig594.frz3.gene7	mh_MhA1_Contig594		mh_MhA1_Contig594	A
OG0006907	A	meloidogyne_hapla.PRJNA29083.WBPS14	transcript:MhA1_Contig194.20	mh_MhA1_Contig194		mh_MhA1_Contig194	A
OG0006913	A	meloidogyne_hapla.PRJNA29083.WBPS14	transcript:MhA1_Contig2007.frz3.gene1	mh_1A		mh_1A	A
OG0006914	A	meloidogyne_hapla.PRJNA29083.WBPS14	transcript:MhA1_Contig75.frz3.gene11	mh_1B		mh_1B	A
OG0006915	C	meloidogyne_hapla.PRJNA29083.WBPS14	transcript:MhA1_Contig2034.frz3.gene1	mh_MhA1_Contig2034		mh_MhA1_Contig2034	C
OG0006916	C	meloidogyne_hapla.PRJNA29083.WBPS14	transcript:MhA1_Contig291.frz3.gene3	mh_13A.17		mh_13A.17	C
OG0006917	C	meloidogyne_hapla.PRJNA29083.WBPS14	transcript:MhA1_Contig45.frz3.fgene2	mh_4		mh_4	C
OG0006918	C	meloidogyne_hapla.PRJNA29083.WBPS14	transcript:MhA1_Contig120.frz3.gene3	mh_11		mh_11	C
OG0006920	C	meloidogyne_hapla.PRJNA29083.WBPS14	transcript:MhA1_Contig133.frz3.gene3	mh_6		mh_6	C
OG0006923	C	meloidogyne_hapla.PRJNA29083.WBPS14	transcript:MhA1_Contig48.frz3.gene20	mh_4		mh_4	C
OG0006924	C	meloidogyne_hapla.PRJNA29083.WBPS14	transcript:MhA1_Contig48.frz3.gene21	mh_4		mh_4	C
OG0006925	C	meloidogyne_hapla.PRJNA29083.WBPS14	transcript:MhA1_Contig46.frz3.gene4	mh_4		mh_4	C
OG0006934	C	meloidogyne_hapla.PRJNA29083.WBPS14	transcript:MhA1_Contig82.frz3.gene11	mh_5		mh_5	C
OG0006935	C	meloidogyne_hapla.PRJNA29083.WBPS14	transcript:MhA1_Contig117.frz3.gene2	mh_4		mh_4	C
OG0006938	C	meloidogyne_hapla.PRJNA29083.WBPS14	transcript:MhA1_Contig116.frz3.fgene4	mh_4		mh_4	C
OG0006940	C	meloidogyne_hapla.PRJNA29083.WBPS14	transcript:MhA1_Contig342.frz3.gene31	mh_3		mh_3	C
OG0006944	C	meloidogyne_hapla.PRJNA29083.WBPS14	transcript:MhA1_Contig134.frz3.gene30	mh_6		mh_6	C
OG0006954	X	meloidogyne_hapla.PRJNA29083.WBPS14	transcript:MhA1_Contig737.frz3.gene9	mh_13A.17		mh_13A.17	X
OG0006955	X	meloidogyne_hapla.PRJNA29083.WBPS14	transcript:MhA1_Contig1534.frz3.fgene1	mh_1B		mh_1B	X
OG0006958	X	meloidogyne_hapla.PRJNA29083.WBPS14	transcript:MhA1_Contig1278.frz3.gene2	mh_8		mh_8	X
OG0006960	X	meloidogyne_hapla.PRJNA29083.WBPS14	transcript:MhA1_Contig1750.frz3.gene5	mh_MhA1_Contig1750		mh_MhA1_Contig1750	X
OG0006961	X	meloidogyne_hapla.PRJNA29083.WBPS14	transcript:MhA1_Contig373.frz3.gene18	mh_10.12.18		mh_10.12.18	X
OG0006962	X	meloidogyne_hapla.PRJNA29083.WBPS14	transcript:MhA1_Contig120.frz3.gene43	mh_11		mh_11	X
OG0006964	X	meloidogyne_hapla.PRJNA29083.WBPS14	transcript:MhA1_Contig34.frz3.gene21	mh_MhA1_Contig34		mh_MhA1_Contig34	X
OG0006966	X	meloidogyne_hapla.PRJNA29083.WBPS14	transcript:MhA1_Contig1278.frz3.gene6	mh_8		mh_8	X
OG0006968	X	meloidogyne_hapla.PRJNA29083.WBPS14	transcript:MhA1_Contig775.frz3.gene8	mh_8		mh_8	X
OG0006969	X	meloidogyne_hapla.PRJNA29083.WBPS14	transcript:MhA1_Contig1194.frz3.gene6	mh_MhA1_Contig1194		mh_MhA1_Contig1194	X
OG0006973	D	meloidogyne_hapla.PRJNA29083.WBPS14	transcript:MhA1_Contig1040.frz3.gene25	mh_5		mh_5	D
OG0006975	D	meloidogyne_hapla.PRJNA29083.WBPS14	transcript:MhA1_Contig1440.frz3.gene12	mh_1B		mh_1B	D
OG0006976	X	meloidogyne_hapla.PRJNA29083.WBPS14	transcript:MhA1_Contig33.frz3.gene10	mh_8		mh_8	X
OG0006979	N	meloidogyne_hapla.PRJNA29083.WBPS14	transcript:MhA1_Contig618.frz3.gene26	mh_11		mh_11	N
OG0006983	N	meloidogyne_hapla.PRJNA29083.WBPS14	transcript:MhA1_Contig1326.frz3.gene4	mh_MhA1_Contig1326		mh_MhA1_Contig1326	N
OG0006993	N	meloidogyne_hapla.PRJNA29083.WBPS14	transcript:MhA1_Contig700.frz3.gene18	mh_7		mh_7	N
OG0007004	E	meloidogyne_hapla.PRJNA29083.WBPS14	transcript:MhA1_Contig1416.frz3.gene10	mh_11		mh_11	E
OG0007009	E	meloidogyne_hapla.PRJNA29083.WBPS14	transcript:MhA1_Contig1823.frz3.gene3	mh_16		mh_16	E
OG0007011	E	meloidogyne_hapla.PRJNA29083.WBPS14	transcript:MhA1_Contig1577.frz3.gene1	mh_MhA1_Contig1577		mh_MhA1_Contig1577	E
OG0007013	E	meloidogyne_hapla.PRJNA29083.WBPS14	transcript:MhA1_Contig438.frz3.gene26	mh_16		mh_16	E
OG0007014	E	meloidogyne_hapla.PRJNA29083.WBPS14	transcript:MhA1_Contig2359.frz3.gene1	mh_MhA1_Contig2359		mh_MhA1_Contig2359	E
OG0007015	E	meloidogyne_hapla.PRJNA29083.WBPS14	transcript:MhA1_Contig1744.frz3.fgene1	mh_MhA1_Contig1744		mh_MhA1_Contig1744	E
OG0007020	E	meloidogyne_hapla.PRJNA29083.WBPS14	transcript:MhA1_Contig398.frz3.gene2	mh_MhA1_Contig398		mh_MhA1_Contig398	E
OG0007144	E	meloidogyne_hapla.PRJNA29083.WBPS14	transcript:MhA1_Contig1556.frz3.gene9	mh_16		mh_16	E
OG0007158	E	meloidogyne_hapla.PRJNA29083.WBPS14	transcript:MhA1_Contig118.frz3.gene21	mh_16		mh_16	E
OG0007180	E	meloidogyne_hapla.PRJNA29083.WBPS14	transcript:MhA1_Contig1235.frz3.gene3	mh_MhA1_Contig1235		mh_MhA1_Contig1235	E
OG0007189	E	meloidogyne_hapla.PRJNA29083.WBPS14	transcript:MhA1_Contig595.frz3.gene11	mh_1B		mh_1B	E
OG0007231	N	meloidogyne_hapla.PRJNA29083.WBPS14	transcript:MhA1_Contig213.frz3.gene15	mh_MhA1_Contig213		mh_MhA1_Contig213	N
OG0007233	C	meloidogyne_hapla.PRJNA29083.WBPS14	transcript:MhA1_Contig1529.frz3.gene6	mh_MhA1_Contig1529		mh_MhA1_Contig1529	C
OG0007237	C	meloidogyne_hapla.PRJNA29083.WBPS14	transcript:MhA1_Contig196.frz3.gene8	mh_21		mh_21	C
OG0007243	C	meloidogyne_hapla.PRJNA29083.WBPS14	transcript:MhA1_Contig541.frz3.gene5	mh_4		mh_4	C
OG0007248	C	meloidogyne_hapla.PRJNA29083.WBPS14	transcript:MhA1_Contig121.frz3.gene10	mh_11		mh_11	C
OG0007254	C	meloidogyne_hapla.PRJNA29083.WBPS14	transcript:MhA1_Contig993.frz3.gene1	mh_8		mh_8	C
OG0007263	C	meloidogyne_hapla.PRJNA29083.WBPS14	transcript:MhA1_Contig306.frz3.gene15	mh_4		mh_4	C
OG0007291	C	meloidogyne_hapla.PRJNA29083.WBPS14	transcript:MhA1_Contig116.frz3.gene21	mh_4		mh_4	C
OG0007307	C	meloidogyne_hapla.PRJNA29083.WBPS14	transcript:MhA1_Contig511.frz3.gene5	mh_MhA1_Contig511		mh_MhA1_Contig511	C
OG0007313	C	meloidogyne_hapla.PRJNA29083.WBPS14	transcript:MhA1_Contig1289.frz3.gene8	mh_8		mh_8	C
OG0007320	C	meloidogyne_hapla.PRJNA29083.WBPS14	transcript:MhA1_Contig468.frz3.gene50	mh_13A.17		mh_13A.17	C
OG0007321	C	meloidogyne_hapla.PRJNA29083.WBPS14	transcript:MhA1_Contig2036.frz3.gene2	mh_MhA1_Contig2036		mh_MhA1_Contig2036	C
OG0007323	C	meloidogyne_hapla.PRJNA29083.WBPS14	transcript:MhA1_Contig172.frz3.gene5	mh_8		mh_8	C
OG0007331	A	meloidogyne_hapla.PRJNA29083.WBPS14	transcript:MhA1_Contig1466.frz3.gene3	mh_MhA1_Contig1466		mh_MhA1_Contig1466	A
OG0007334	A	meloidogyne_hapla.PRJNA29083.WBPS14	transcript:MhA1_Contig1330.frz3.fgene1	mh_16		mh_16	A
OG0007355	A	meloidogyne_hapla.PRJNA29083.WBPS14	transcript:MhA1_Contig590.frz3.gene11	mh_1B		mh_1B	A
OG0007359	A	meloidogyne_hapla.PRJNA29083.WBPS14	transcript:MhA1_Contig334.frz3.gene37	mh_7		mh_7	A
OG0007362	A	meloidogyne_hapla.PRJNA29083.WBPS14	transcript:MhA1_Contig677.frz3.gene4	mh_MhA1_Contig677		mh_MhA1_Contig677	A
OG0007374	C	meloidogyne_hapla.PRJNA29083.WBPS14	transcript:MhA1_Contig737.frz3.gene22	mh_13A.17		mh_13A.17	C
OG0007377	A	meloidogyne_hapla.PRJNA29083.WBPS14	transcript:MhA1_Contig94.frz3.gene22	mh_13A.17		mh_13A.17	A
OG0007391	A	meloidogyne_hapla.PRJNA29083.WBPS14	transcript:MhA1_Contig310.frz3.gene18	mh_MhA1_Contig310		mh_MhA1_Contig310	A
OG0007395	A	meloidogyne_hapla.PRJNA29083.WBPS14	transcript:MhA1_Contig484.frz3.gene27	mh_1A		mh_1A	A
OG0007401	A	meloidogyne_hapla.PRJNA29083.WBPS14	transcript:MhA1_Contig1535.frz3.gene1	mh_2A		mh_2A	A
OG0007403	A	meloidogyne_hapla.PRJNA29083.WBPS14	transcript:MhA1_Contig1131.frz3.gene6	mh_10.12.18		mh_10.12.18	A
OG0007404	A	meloidogyne_hapla.PRJNA29083.WBPS14	transcript:MhA1_Contig252.frz3.gene7	mh_2B		mh_2B	A
OG0007415	N	meloidogyne_hapla.PRJNA29083.WBPS14	transcript:MhA1_Contig194.frz3.gene42	mh_MhA1_Contig194		mh_MhA1_Contig194	N
OG0007416	C	meloidogyne_hapla.PRJNA29083.WBPS14	transcript:MhA1_Contig469.frz3.gene1	mh_13A.17		mh_13A.17	C
OG0007422	C	meloidogyne_hapla.PRJNA29083.WBPS14	transcript:MhA1_Contig1174.frz3.gene7	mh_MhA1_Contig1174		mh_MhA1_Contig1174	C
OG0007423	C	meloidogyne_hapla.PRJNA29083.WBPS14	transcript:MhA1_Contig30.frz3.gene23	mh_1B		mh_1B	C
OG0007430	A	meloidogyne_hapla.PRJNA29083.WBPS14	transcript:MhA1_Contig353.frz3.gene15	mh_13B		mh_13B	A
OG0007440	C	meloidogyne_hapla.PRJNA29083.WBPS14	transcript:MhA1_Contig541.frz3.gene9	mh_4		mh_4	C
OG0007455	C	meloidogyne_hapla.PRJNA29083.WBPS14	transcript:MhA1_Contig1377.frz3.gene10	mh_3		mh_3	C
OG0007489	A	meloidogyne_hapla.PRJNA29083.WBPS14	transcript:MhA1_Contig70.frz3.gene26	mh_1B		mh_1B	A
OG0007500	X	meloidogyne_hapla.PRJNA29083.WBPS14	transcript:MhA1_Contig1447.frz3.gene1	mh_13A.17		mh_13A.17	X
OG0007552	D	meloidogyne_hapla.PRJNA29083.WBPS14	transcript:MhA1_Contig1140.frz3.fgene2	mh_7		mh_7	D
OG0007577	D	meloidogyne_hapla.PRJNA29083.WBPS14	transcript:MhA1_Contig1416.frz3.gene17	mh_11		mh_11	D
OG0007582	D	meloidogyne_hapla.PRJNA29083.WBPS14	transcript:MhA1_Contig1243.frz3.gene3	mh_8		mh_8	D
OG0007605	D	meloidogyne_hapla.PRJNA29083.WBPS14	transcript:MhA1_Contig20.frz3.gene25	mh_2A		mh_2A	D
OG0007621	D	meloidogyne_hapla.PRJNA29083.WBPS14	transcript:MhA1_Contig1214.frz3.gene5	mh_7		mh_7	D
OG0007634	D	meloidogyne_hapla.PRJNA29083.WBPS14	transcript:MhA1_Contig256.frz3.fgene1	mh_13A.17		mh_13A.17	D
OG0007641	D	meloidogyne_hapla.PRJNA29083.WBPS14	transcript:MhA1_Contig522.frz3.gene3	mh_2B		mh_2B	D
OG0007655	B	meloidogyne_hapla.PRJNA29083.WBPS14	transcript:MhA1_Contig2237.frz3.gene3	mh_11		mh_11	B
OG0007689	B	meloidogyne_hapla.PRJNA29083.WBPS14	transcript:MhA1_Contig1698.frz3.gene8	mh_10.12.18		mh_10.12.18	B
OG0007701	B	meloidogyne_hapla.PRJNA29083.WBPS14	transcript:MhA1_Contig1356.frz3.gene7	mh_16		mh_16	B
OG0007710	B	meloidogyne_hapla.PRJNA29083.WBPS14	transcript:MhA1_Contig385.frz3.gene2	mh_10.12.18		mh_10.12.18	B
OG0007715	B	meloidogyne_hapla.PRJNA29083.WBPS14	transcript:MhA1_Contig621.frz3.gene19	mh_5		mh_5	B
OG0007723	B	meloidogyne_hapla.PRJNA29083.WBPS14	transcript:MhA1_Contig877.frz3.fgene4	mh_5		mh_5	B
OG0007730	B	meloidogyne_hapla.PRJNA29083.WBPS14	transcript:MhA1_Contig110.frz3.gene16	mh_MhA1_Contig110		mh_MhA1_Contig110	B
OG0007757	A	meloidogyne_hapla.PRJNA29083.WBPS14	transcript:MhA1_Contig2970.frz3.gene3	mh_MhA1_Contig2970		mh_MhA1_Contig2970	A
OG0007762	A	meloidogyne_hapla.PRJNA29083.WBPS14	transcript:MhA1_Contig1289.frz3.gene16	mh_8		mh_8	A
OG0007774	C	meloidogyne_hapla.PRJNA29083.WBPS14	transcript:MhA1_Contig42.frz3.gene50	mh_4		mh_4	C
OG0007781	C	meloidogyne_hapla.PRJNA29083.WBPS14	transcript:MhA1_Contig291.frz3.gene4	mh_13A.17		mh_13A.17	C
OG0007839	E	meloidogyne_hapla.PRJNA29083.WBPS14	transcript:MhA1_Contig301.frz3.gene12	mh_21		mh_21	E
OG0007843	E	meloidogyne_hapla.PRJNA29083.WBPS14	transcript:MhA1_Contig818.frz3.fgene2	mh_7		mh_7	E
OG0007861	E	meloidogyne_hapla.PRJNA29083.WBPS14	transcript:MhA1_Contig454.frz3.fgene1	mh_MhA1_Contig454		mh_MhA1_Contig454	E
[truncated: 11 more columns]
