# Supplementary material
Source: publisher figshare collection journal article supplement (https://gsajournals.figshare.com/articles/dataset/_/12982394)
Supplement: Supplementary file 3 [file 1]

## Bibliography cited in File S1, File S2 and Table S2

- Alonge, M., Soyk, S., Ramakrishnan, S., Wang, X., Goodwin, S., Sedlazeck, F.J., Lippman, Z.B., Schatz, M.C., 2019. RaGOO: fast and accurate reference-guided scaffolding of draft genomes. *Genome Biol.* 20, 224. doi:10.1186/s13059-019-1829-6
- Benson, G., 1999. Tandem repeats finder: a program to analyze DNA sequences. *Nucleic Acids Res.* 27, 573–580. doi:10.1093/nar/27.2.573
- Besnard, F., Koutsovoulos, G., Dieudonné, S., Blaxter, M., Félix, M.-A., 2017. Toward Universal Forward Genetics: Using a Draft Genome Sequence of the Nematode *Oscheius tipulae* To Identify Mutations Affecting Vulva Development. *Genetics* 206, 1747–1761. doi:10.1534/genetics.117.203521
- Blaxter, M., Koutsovoulos, G., 2015. The evolution of parasitism in Nematoda. *Parasitology* 142 Suppl 1, S26–39. doi:10.1017/S0031182014000791
- Bonfield, J.K., Whitwham, A., 2010. Gap5--editing the billion fragment sequence assembly. *Bioinformatics* 26, 1699–1703. doi:10.1093/bioinformatics/btq268
- Buchfink, B., Xie, C., Huson, D.H., 2015. Fast and sensitive protein alignment using DIAMOND. *Nat. Methods* 12, 59–60. doi:10.1038/nmeth.3176
- Bushnell, B., 2017. BBTools. <https://sourceforge.net/projects/bbmap/>.
- C. elegans Sequencing Consortium, 1998. Genome sequence of the nematode *C. elegans*: a platform for investigating biology. *Science* 282, 2012–2018. doi:10.1126/science.282.5396.2012
- Camacho, C., Coulouris, G., Avagyan, V., Ma, N., Papadopoulos, J., Bealer, K., Madden, T.L., 2009. BLAST+: architecture and applications. *BMC Bioinformatics* 10, 421. doi:10.1186/1471-2105-10-421
- Challis, R., Richards, E., Rajan, J., Cochrane, G., Blaxter, M., 2020. BlobToolKit - Interactive Quality Assessment of Genome Assemblies. *G3 (Bethesda)*. doi:10.1534/g3.119.400908
- Chevreux, B., Wetter, T., Suhai, S., 1999. Genome sequence assembly using trace signals and additional sequence information. Presented at the German conference on bioinformatics, Citeseer, pp. 45--56.
- Cotton, J.A., Bennuru, S., Grote, A., Harsha, B., Tracey, A., Beech, R., Doyle, S.R., Dunn, M., Hotopp, J.C.D., Holroyd, N., Kikuchi, T., Lambert, O., Mhashilkar, A., Mutowo, P., Nursimulu, N., Ribeiro, J.M.C., Rogers, M.B., Stanley, E., Swapna, L.S., Tsai, I.J., Lustigman, S., 2016. The genome of *Onchocerca volvulus*, agent of river blindness. *Nat. Microbiol.* 2, 16216. doi:10.1038/nmicrobiol.2016.216
- Dainat, J., 2020. NBISweden/AGAT: AGAT-v0.1.1. Zenodo. doi:10.5281/zenodo.3674778
- Edgar, R.C., 2010. Search and clustering orders of magnitude faster than BLAST. *Bioinformatics* 26, 2460–2461. doi:10.1093/bioinformatics/btq461
- Ellinghaus, D., Kurtz, S., Willhoeft, U., 2008. LTRharvest, an efficient and flexible software for de novo detection of LTR retrotransposons. *BMC Bioinformatics*



- 9, 18. doi:10.1186/1471-2105-9-18
- Emms, D.M., Kelly, S., 2015. OrthoFinder: solving fundamental biases in whole genome comparisons dramatically improves orthogroup inference accuracy. *Genome Biol.* 16, 157. doi:10.1186/s13059-015-0721-2
- Emms, D.M., Kelly, S., 2019. OrthoFinder: phylogenetic orthology inference for comparative genomics. *Genome Biol.* 20, 238. doi:10.1186/s13059-019-1832-y
- Flynn, J.M., Hubley, R., Goubert, C., Rosen, J., Clark, A.G., Feschotte, C., Smit, A.F., 2020. RepeatModeler2 for automated genomic discovery of transposable element families. *Proc Natl Acad Sci USA* 117, 9451–9457. doi:10.1073/pnas.1921046117
- Foster, J.M., Grote, A., Mattick, J., Tracey, A., Tsai, Y.-C., Chung, M., Cotton, J.A., Clark, T.A., Geber, A., Holroyd, N., Korlach, J., Li, Y., Libro, S., Lustigman, S., Michalski, M.L., Paulini, M., Rogers, M.B., Teigen, L., Twaddle, A., Welch, L., Ghedin, E., 2020. Sex chromosome evolution in parasitic nematodes of humans. *Nat. Commun.* 11, 1964. doi:10.1038/s41467-020-15654-6
- Garrison, E., Marth, G., 2012. Haplotype-based variant detection from short-read sequencing. *arXiv*.
- Haas, B.J., Delcher, A.L., Mount, S.M., Wortman, J.R., Smith, R.K., Hannick, L.I., Maiti, R., Ronning, C.M., Rusch, D.B., Town, C.D., Salzberg, S.L., White, O., 2003. Improving the Arabidopsis genome annotation using maximal transcript alignment assemblies. *Nucleic Acids Res.* 31, 5654–5666. doi:10.1093/nar/gkg770
- Haas, B., 2007. TransposonPSI: an application of PSI-Blast to mine (retro-) transposon ORF homologies. <http://transposonpsi.sourceforge.net/>.
- Kalvari, I., Argasinska, J., Quinones-Olvera, N., Nawrocki, E.P., Rivas, E., Eddy, S.R., Bateman, A., Finn, R.D., Petrov, A.I., 2018. Rfam 13.0: shifting to a genome-centric resource for non-coding RNA families. *Nucleic Acids Res.* 46, D335–D342. doi:10.1093/nar/gkx1038
- Kanzaki, N., Tsai, I.J., Tanaka, R., Hunt, V.L., Liu, D., Tsuyama, K., Maeda, Y., Namai, S., Kumagai, R., Tracey, A., Holroyd, N., Doyle, S.R., Woodruff, G.C., Murase, K., Kitazume, H., Chai, C., Akagi, A., Panda, O., Ke, H.-M., Schroeder, F.C., Kikuchi, T., 2018. Biology and genome of a newly discovered sibling species of *Caenorhabditis elegans*. *Nat. Commun.* 9, 3216. doi:10.1038/s41467-018-05712-5
- Kolmogorov, M., Yuan, J., Lin, Y., Pevzner, P.A., 2019. Assembly of long, error-prone reads using repeat graphs. *Nat. Biotechnol.* 37, 540–546. doi:10.1038/s41587-019-0072-8
- Koren, S., Walenz, B.P., Berlin, K., Miller, J.R., Bergman, N.H., Phillippy, A.M., 2017. Canu: scalable and accurate long-read assembly via adaptive k-mer weighting and repeat separation. *Genome Res.* 27, 722–736. doi:10.1101/gr.215087.116
- Krijthe, J.H., 2015. Rtsne: T-distributed stochastic neighbor embedding using Barnes-Hut implementation. R package version 0.13, URL <https://github.com>.



- com/jkrijthe/Rtsne.
- Kurtz, S., Phillippy, A., Delcher, A.L., Smoot, M., Shumway, M., Antonescu, C., Salzberg, S.L., 2004. Versatile and open software for comparing large genomes. *Genome Biol.* 5, R12. doi:10.1186/gb-2004-5-2-r12
- Laetsch, Dominik R, Blaxter, M.L., 2017. KinFin: Software for Taxon-Aware Analysis of Clustered Protein Sequences. *G3 (Bethesda)* 7, 3349–3357. doi:10.1534/g3.117.300233
- Laetsch, Dominik R., Blaxter, M.L., 2017. BlobTools: Interrogation of genome assemblies [version 1; peer review: 2 approved with reservations]. *F1000Res.* 6, 1287. doi:10.12688/f1000research.12232.1
- Lagesen, K., Hallin, P., Rødland, E.A., Staerfeldt, H.-H., Rognes, T., Ussery, D.W., 2007. RNAmmer: consistent and rapid annotation of ribosomal RNA genes. *Nucleic Acids Res.* 35, 3100–3108. doi:10.1093/nar/gkm160
- Laing, R., Martinelli, A., Tracey, A., Holroyd, N., Gilleard, J.S., Cotton, J.A., 2016. *Haemonchus contortus*: Genome Structure, Organization and Comparative Genomics. *Adv. Parasitol.* 93, 569–598. doi:10.1016/bs.apar.2016.02.016
- Lefoulon, E., Bain, O., Bourret, J., Junker, K., Guerrero, R., Cañizales, I., Kuzmin, Y., Satoto, T.B.T., Cardenas-Callirgos, J.M., de Souza Lima, S., Raccurt, C., Mutafovchiev, Y., Gavotte, L., Martin, C., 2015. Shaking the Tree: Multi-locus Sequence Typing Usurps Current Onchocercid (Filarial Nematode) Phylogeny. *PLoS Negl. Trop. Dis.* 9, e0004233. doi:10.1371/journal.pntd.0004233
- Li, H., 2018. Minimap2: pairwise alignment for nucleotide sequences. *Bioinformatics* 34, 3094–3100. doi:10.1093/bioinformatics/bty191
- Li, H., Durbin, R., 2009. Fast and accurate short read alignment with Burrows-Wheeler transform. *Bioinformatics* 25, 1754–1760. doi:10.1093/bioinformatics/btp324
- Lomsadze, A., Ter-Hovhannisyan, V., Chernoff, Y.O., Borodovsky, M., 2005. Gene identification in novel eukaryotic genomes by self-training algorithm. *Nucleic Acids Res.* 33, 6494–6506. doi:10.1093/nar/gki937
- Nattestad, M., 2018. Dot. <https://github.com/dnanexus/dot>.
- Nemetschke, L., Eberhardt, A.G., Viney, M.E., Streit, A., 2010. A genetic map of the animal-parasitic nematode *Strongyloides ratti*. *Mol. Biochem. Parasitol.* 169, 124–127. doi:10.1016/j.molbiopara.2009.10.008
- Opperman, C.H., Bird, D.M., Williamson, V.M., Rokhsar, D.S., Burke, M., Cohn, J., Cromer, J., Diener, S., Gajan, J., Graham, S., Houfek, T.D., Liu, Q., Mitros, T., Schaff, J., Schaffer, R., Scholl, E., Sosinski, B.R., Thomas, V.P., Windham, E., 2008. Sequence and genetic map of *Meloidogyne hapla*: A compact nematode genome for plant parasitism. *Proc Natl Acad Sci USA* 105, 14802–14807. doi:10.1073/pnas.0805946105
- Oxford Nanopore Technologies Ltd., 2017. Medaka. <https://github.com/nanoporetech/medaka>.
- Post, R., 2005. The chromosomes of the Filariidae. *Filaria J.* 4, 10.



doi:10.1186/1475-2883-4-10

- Rödelsperger, C., Meyer, J.M., Prabh, N., Lanz, C., Bemm, F., Sommer, R.J., 2017. Single-Molecule Sequencing Reveals the Chromosome-Scale Genomic Architecture of the Nematode Model Organism *Pristionchus pacificus*. *Cell Rep.* 21, 834–844. doi:10.1016/j.celrep.2017.09.077
- Seemann, T., 2014. snippy: fast bacterial variant calling from NGS reads. <https://github.com/tseemann/snippy>.
- Serra, L., Macchietto, M., Macias-Muñoz, A., McGill, C.J., Rodriguez, I.M., Rodriguez, B., Murad, R., Mortazavi, A., 2019. Hybrid Assembly of the Genome of the Entomopathogenic Nematode *Steinernema carpocapsae* Identifies the X-Chromosome. *G3 (Bethesda)* 9, 2687–2697. doi:10.1534/g3.119.400180
- Simão, F.A., Waterhouse, R.M., Ioannidis, P., Kriventseva, E.V., Zdobnov, E.M., 2015. BUSCO: assessing genome assembly and annotation completeness with single-copy orthologs. *Bioinformatics* 31, 3210–3212. doi:10.1093/bioinformatics/btv351
- Smit, A.F., Hubley, R., Green, P., 2015. RepeatMasker. RepeatMasker website.
- Stein, L.D., Bao, Z., Blasiar, D., Blumenthal, T., Brent, M.R., Chen, N., Chinwalla, A., Clarke, L., Clee, C., Coghlan, A., Coulson, A., D'Eustachio, P., Fitch, D.H.A., Fulton, L.A., Fulton, R.E., Griffiths-Jones, S., Harris, T.W., Hillier, L.W., Kamath, R., Kuwabara, P.E., Waterston, R.H., 2003. The genome sequence of *Caenorhabditis briggsae*: a platform for comparative genomics. *PLoS Biol.* 1, E45. doi:10.1371/journal.pbio.0000045
- Steinbiss, S., Willhoeft, U., Gremme, G., Kurtz, S., 2009. Fine-grained annotation and classification of de novo predicted LTR retrotransposons. *Nucleic Acids Res.* 37, 7002–7013. doi:10.1093/nar/gkp759
- Susič, N., Koutsovoulos, G.D., Riccio, C., Danchin, E.G.J., Blaxter, M.L., Lunt, D.H., Strajnar, P., Širca, S., Urek, G., Stare, B.G., 2020. Genome sequence of the root-knot nematode *Meloidogyne luci*. *J. Nematol.* 52, 1–5. doi:10.21307/jofnem-2020-025
- Szitenberg, A., Salazar-Jaramillo, L., Blok, V.C., Laetsch, D.R., Joseph, S., Williamson, V.M., Blaxter, M.L., Lunt, D.H., 2017. Comparative genomics of apomictic root-knot nematodes: hybridization, ploidy, and dynamic genome change. *Genome Biol. Evol.* 9, 2844–2861. doi:10.1093/gbe/evx201
- Tandonnet, S., Koutsovoulos, G.D., Adams, S., Cloarec, D., Parihar, M., Blaxter, M.L., Pires-daSilva, A., 2019. Chromosome-Wide Evolution and Sex Determination in the Three-Sexed Nematode *Auanema rhodensis*. *G3 (Bethesda)* 9, 1211–1230. doi:10.1534/g3.119.0011
- Team, R.C., 2019. R: A Language and Environment for Statistical Computing.
- Tenenbaum, D., 2019. KEGGREST: Client-side REST access to KEGG. <https://www.bioconductor.org/packages/release/bioc/html/KEGGREST.html>.
- Teterina, A.A., Willis, J.H., Phillips, P.C., 2020. Chromosome-Level Assembly of the *Caenorhabditis remanei* Genome Reveals Conserved Patterns of Nematode



- Genome Organization. *Genetics* 214, 769–780.  
doi:10.1534/genetics.119.303018
- Thomas, V.P., Fudali, S.L., Schaff, J.E., Liu, Q., Scholl, E.H., Opperman, C.H., Bird, D.M., Williamson, V.M., 2012. A sequence-anchored linkage map of the plant-parasitic nematode *Meloidogyne hapla* reveals exceptionally high genome-wide recombination. *G3 (Bethesda)* 2, 815–824.  
doi:10.1534/g3.112.002261
- Thompson, J.D., Higgins, D.G., Gibson, T.J., 1994. CLUSTAL W: improving the sensitivity of progressive multiple sequence alignment through sequence weighting, position-specific gap penalties and weight matrix choice. *Nucleic Acids Res.* 22, 4673–4680. doi:10.1093/nar/22.22.4673
- Vaser, R., Sović, I., Nagarajan, N., Šikić, M., 2017. Fast and accurate de novo genome assembly from long uncorrected reads. *Genome Res.* 27, 737–746.  
doi:10.1101/gr.214270.116
- Walker, B.J., Abeel, T., Shea, T., Priest, M., Abouelliel, A., Sakthikumar, S., Cuomo, C.A., Zeng, Q., Wortman, J., Young, S.K., Earl, A.M., 2014. Pilon: an integrated tool for comprehensive microbial variant detection and genome assembly improvement. *PLoS ONE* 9, e112963. doi:10.1371/journal.pone.0112963
- Walton, A.C., 1959. Some parasites and their chromosomes. *J. Parasitol.* 45, 1–20.
- Wang, J., Veronezi, G.M.B., Kang, Y., Zagoskin, M., O'Toole, E.T., Davis, R.E., 2020. Comprehensive chromosome end remodeling during programmed DNA elimination. *BioRxiv*. doi:10.1101/2020.04.18.047035
- Warburton, P.E., Giordano, J., Cheung, F., Gelfand, Y., Benson, G., 2004. Inverted repeat structure of the human genome: the X-chromosome contains a preponderance of large, highly homologous inverted repeats that contain testes genes. *Genome Res.* 14, 1861–1869. doi:10.1101/gr.2542904
- Waterhouse, A.M., Procter, J.B., Martin, D.M.A., Clamp, M., Barton, G.J., 2009. Jalview Version 2--a multiple sequence alignment editor and analysis workbench. *Bioinformatics* 25, 1189–1191. doi:10.1093/bioinformatics/btp033
- Xiong, W., He, L., Lai, J., Dooner, H.K., Du, C., 2014. HelitronScanner uncovers a large overlooked cache of Helitron transposons in many plant genomes. *Proc Natl Acad Sci USA* 111, 10263–10268. doi:10.1073/pnas.1410068111
- Yin, D., Schwarz, E.M., Thomas, C.G., Felde, R.L., Korf, I.F., Cutter, A.D., Schartner, C.M., Ralston, E.J., Meyer, B.J., Haag, E.S., 2018. Rapid genome shrinkage in a self-fertile nematode reveals sperm competition proteins. *Science* 359, 55–61. doi:10.1126/science.aao0827
