# Supplementary material
Source: publisher figshare collection journal article supplement (https://gsajournals.figshare.com/articles/dataset/_/12982394)
Supplement: Supplementary file 4 [file 1]

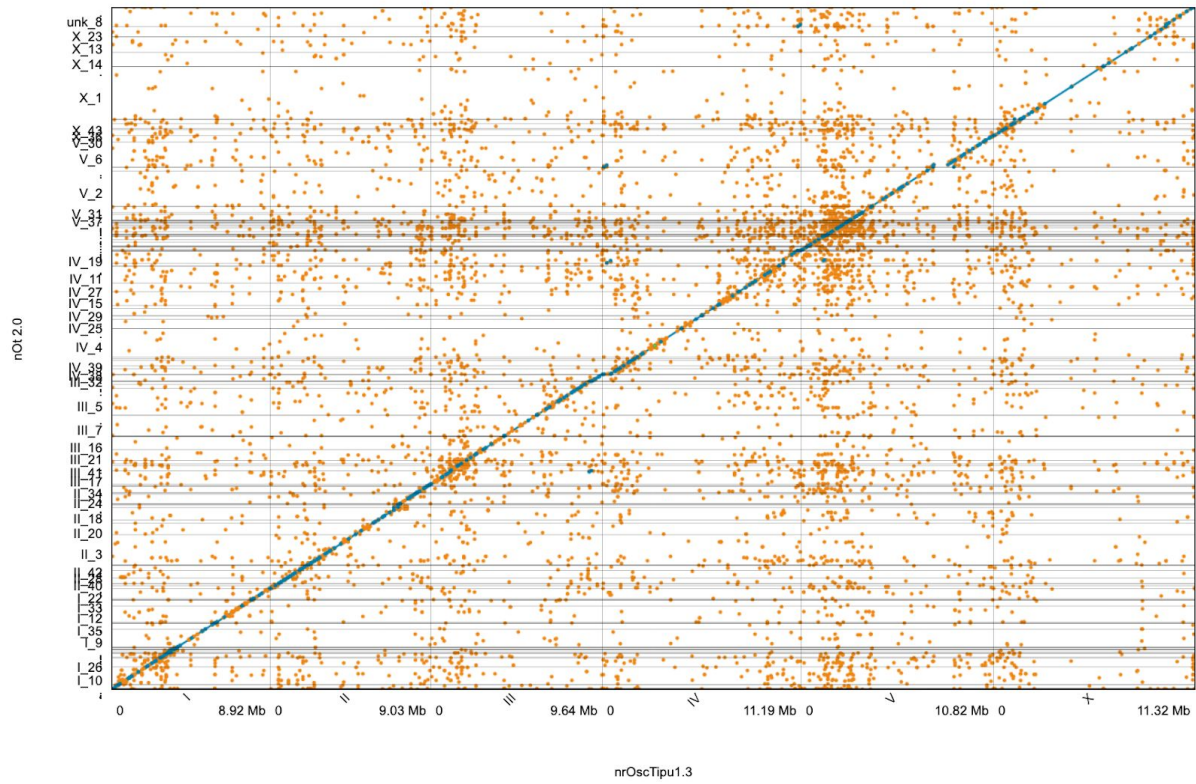

**Figure S5.** nOti 2.0 assembly aligned to nrOscTipu1.3

The telomere-to-telomere genome assembly (x axis) aligned to the previous assembly (Besnard et al., 2017) (y axis) in nucmer (Kurtz et al., 2004). Blue dots indicate co-oriented nucleotide matches, while orange dots indicate matches in opposite orientations.
