# Supplementary material
Source: publisher figshare collection journal article supplement (https://gsajournals.figshare.com/articles/dataset/_/12982394)
Supplement: Supplementary file 6 [file 1]

**A**

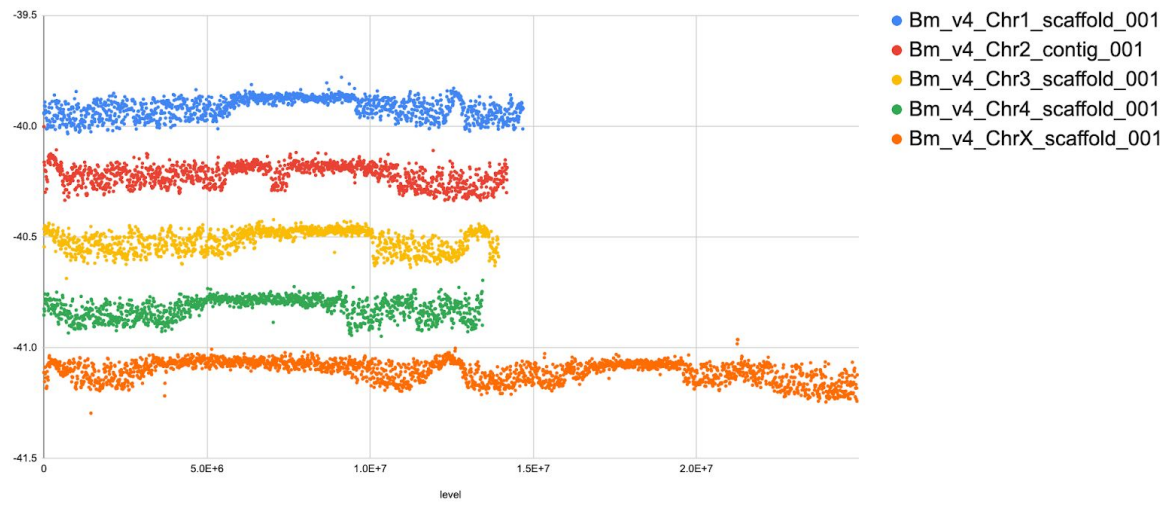

**B**

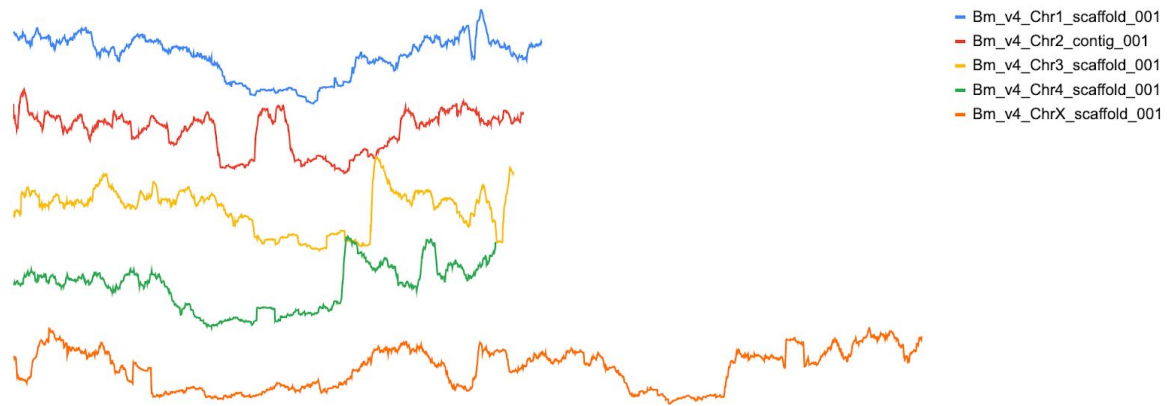



C

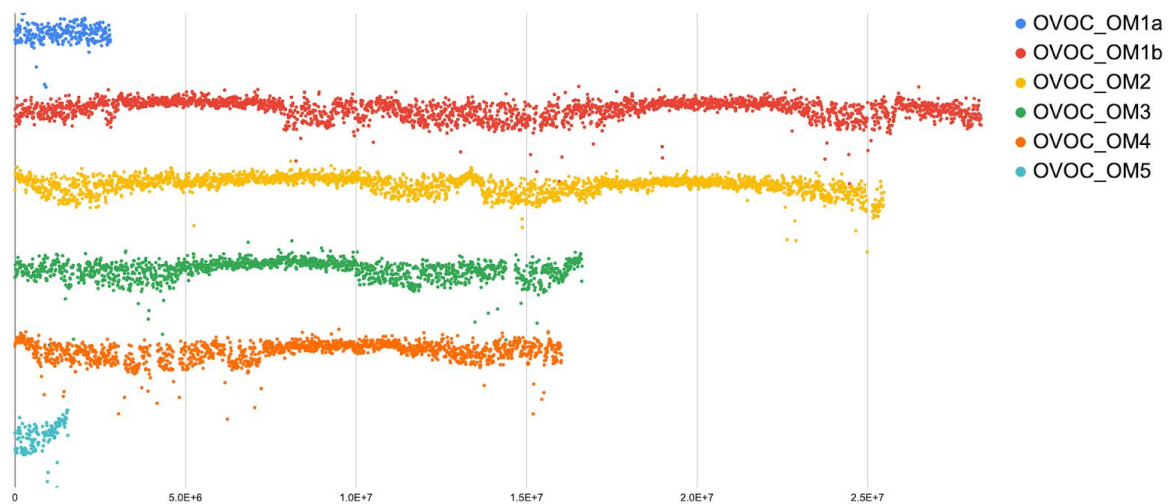

D

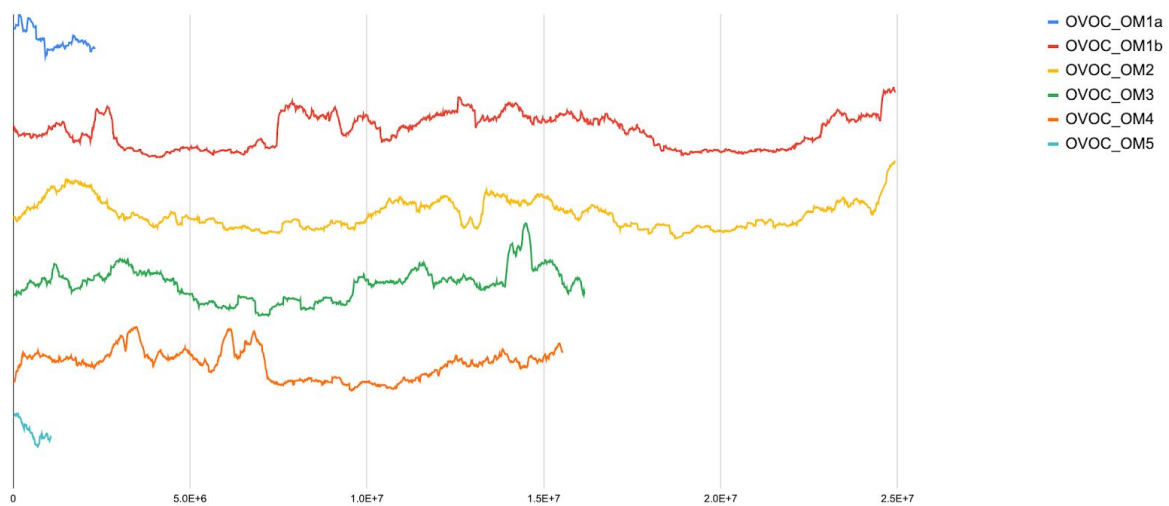



E

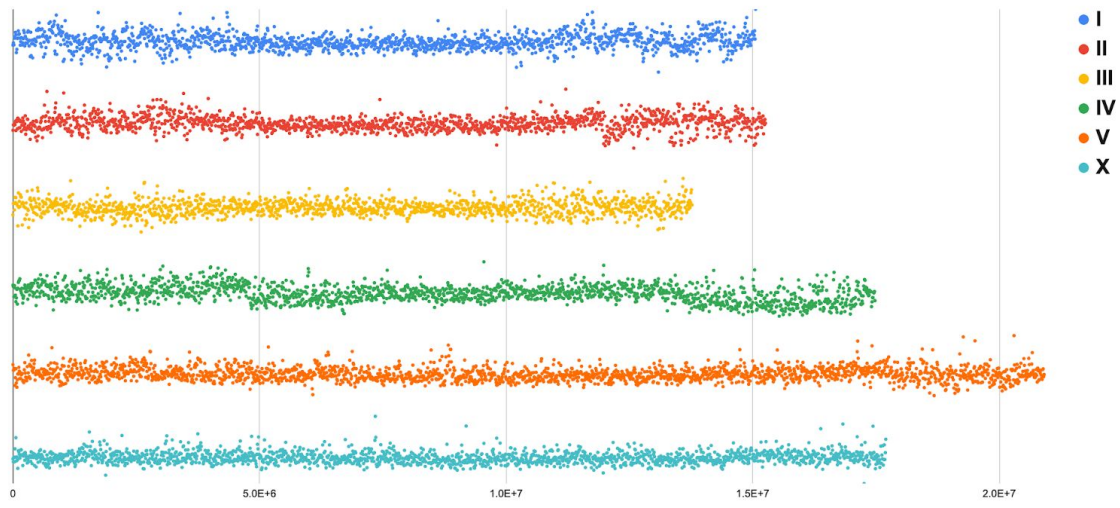

F

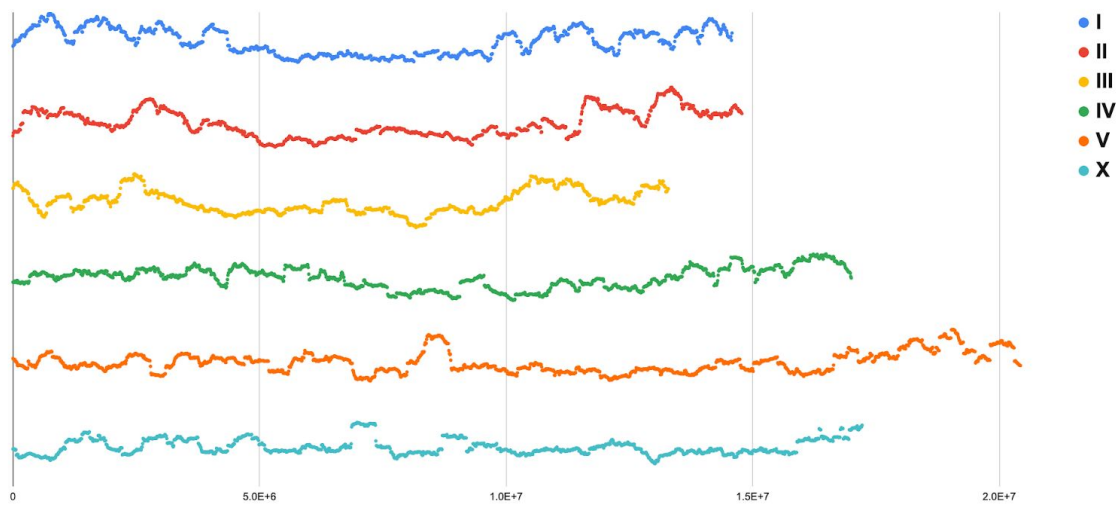

**Figure S6.** GC proportion plots of nematode chromosomes

A *B. malayi* GC proportion in 10kb windows across the chromosomes.

B *B. malayi* GC proportion standard deviation in 0.5 Mb sliding windows across the chromosomes.

C *O. volvulus* GC proportion in 10kb windows across the chromosomes.

D *O. volvulus* GC proportion standard deviation in 0.5 Mb sliding windows across the chromosomes.

E *C. elegans* GC proportion in 10kb windows across the chromosomes.



F *C. elegans* GC proportion standard deviation in 0.5 Mb sliding windows across the chromosomes.
