# Supplementary material
Source: publisher figshare collection journal article supplement (https://gsajournals.figshare.com/articles/dataset/_/12982394)
Supplement: Supplementary file 8 [file 1]

### A *Caenorhabditis briggsae*

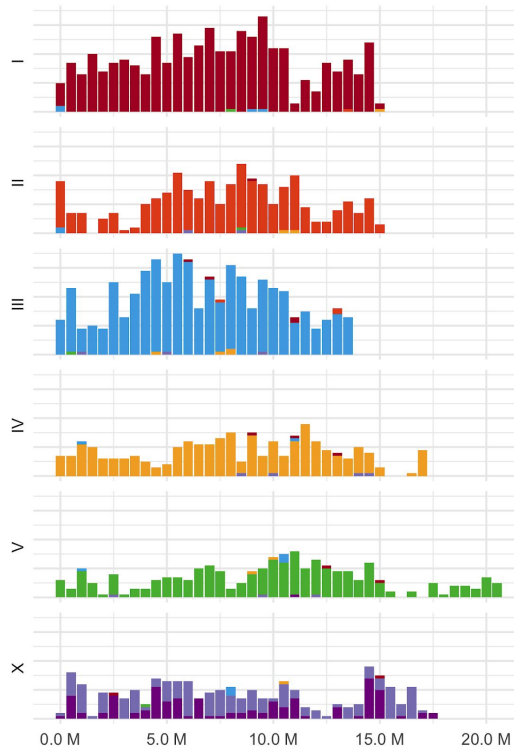

### B *Caenorhabditis inopinata*

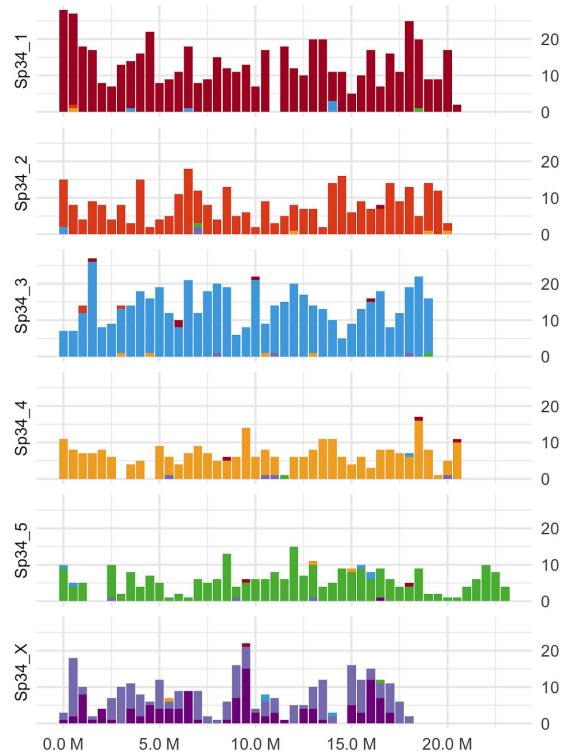

### C *Caenorhabditis nigoni*

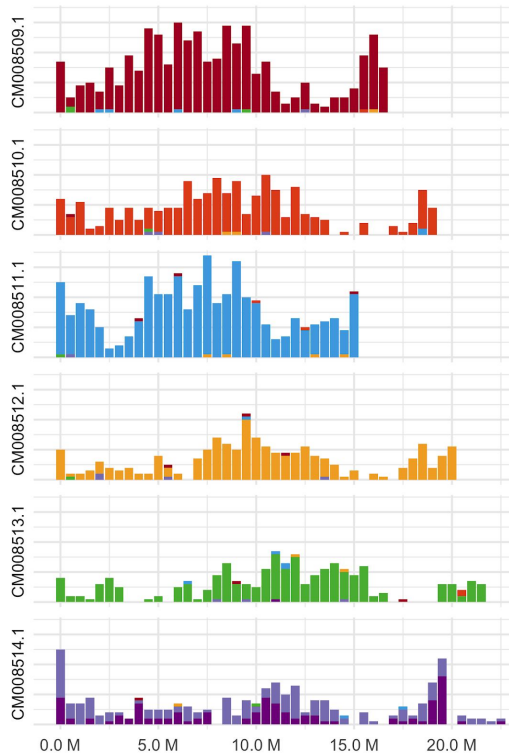

### D *Caenorhabditis remanei*

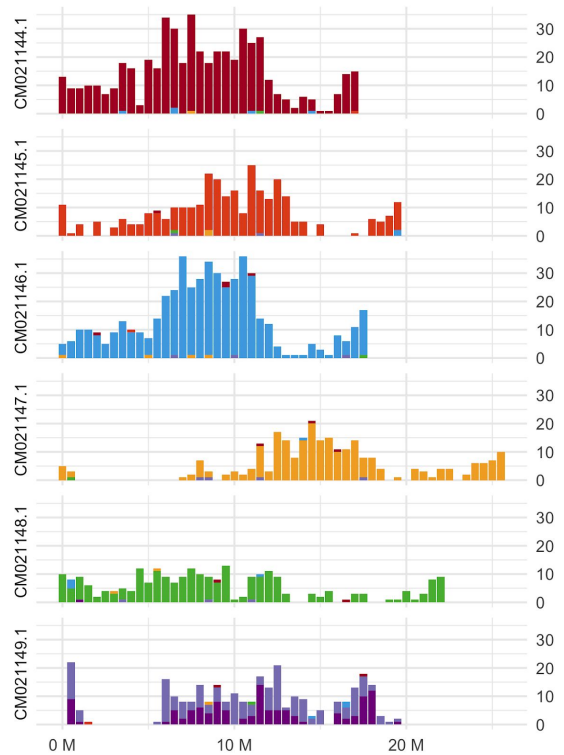

### E *Caenorhabditis elegans*

### F *Haemonchus contortus*



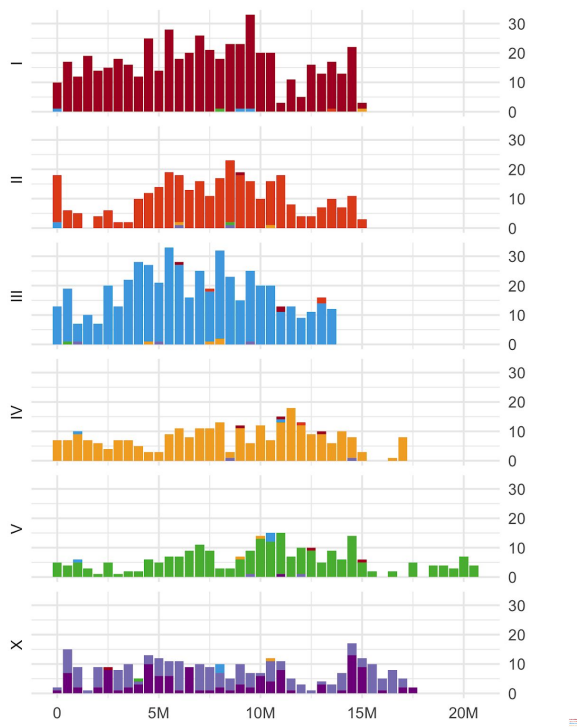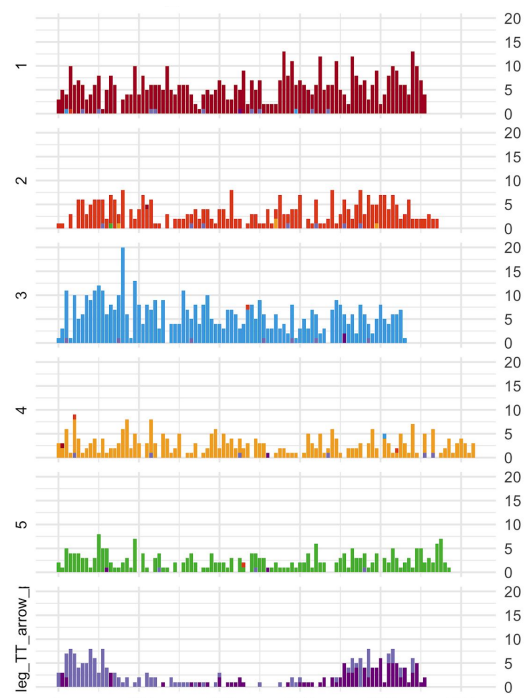

**G** *Auanema rhodensis*

**H** *Pristionchus pacificus*

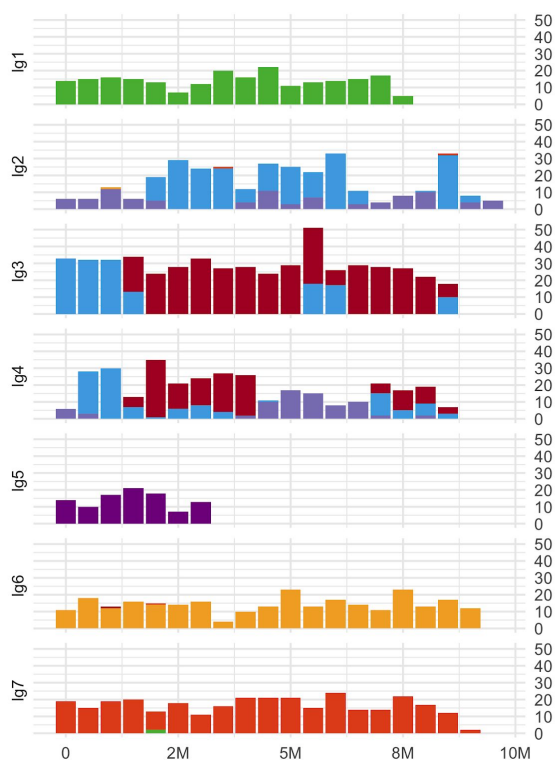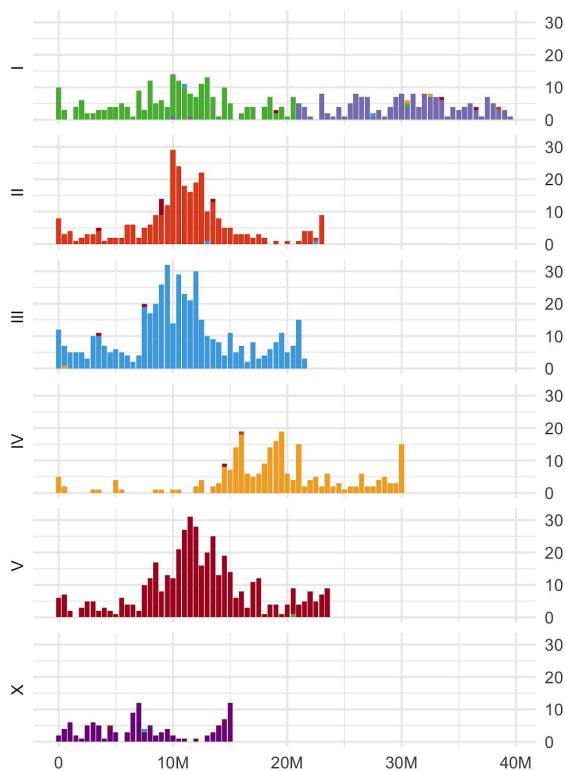



# I *Strongyloides ratti*

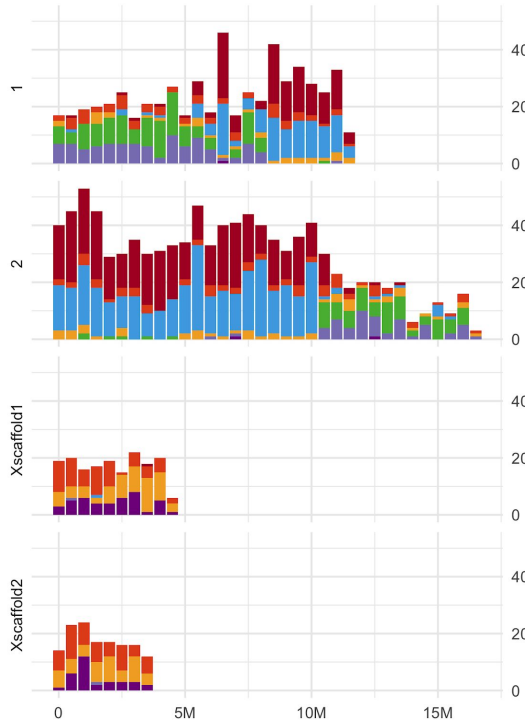

# J *Steinernema carpocapsae*

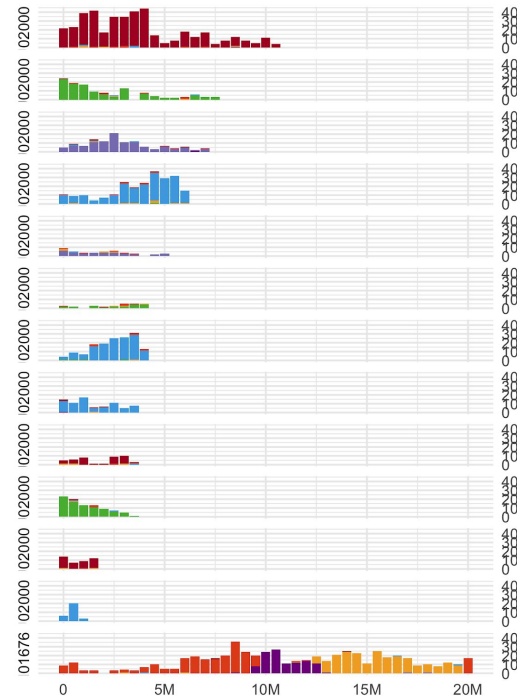

# K *Bursaphelenchus xylophilus*

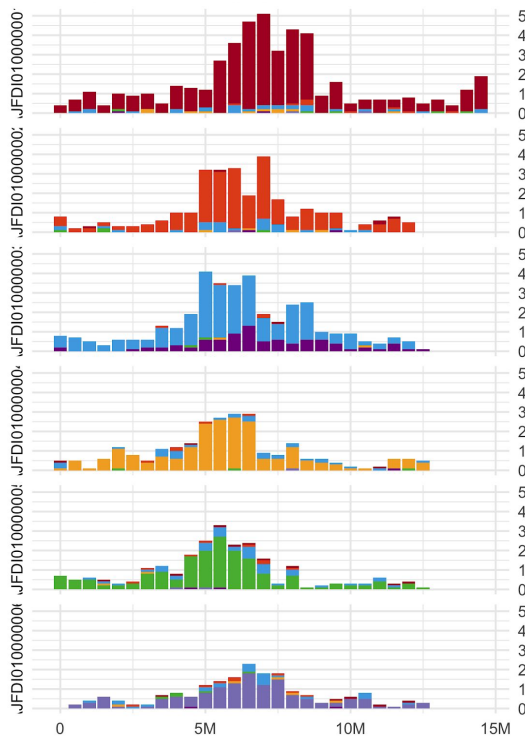

# L *Bursaphelenchus okinawaensis*

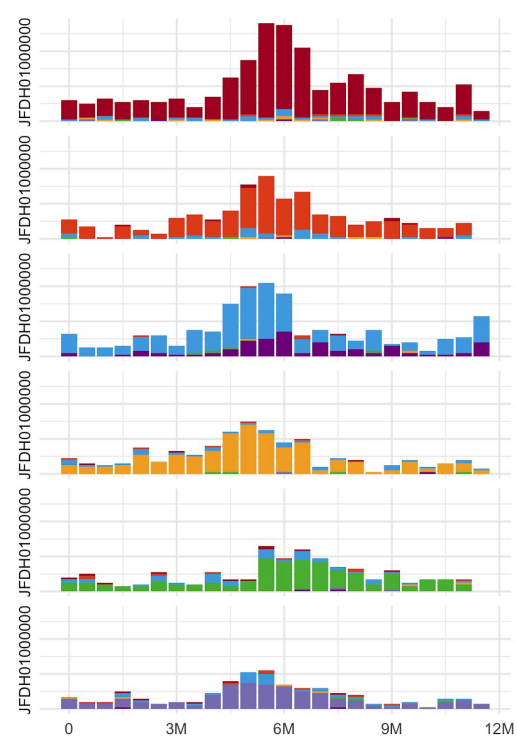



**M** *Brugia malayi*

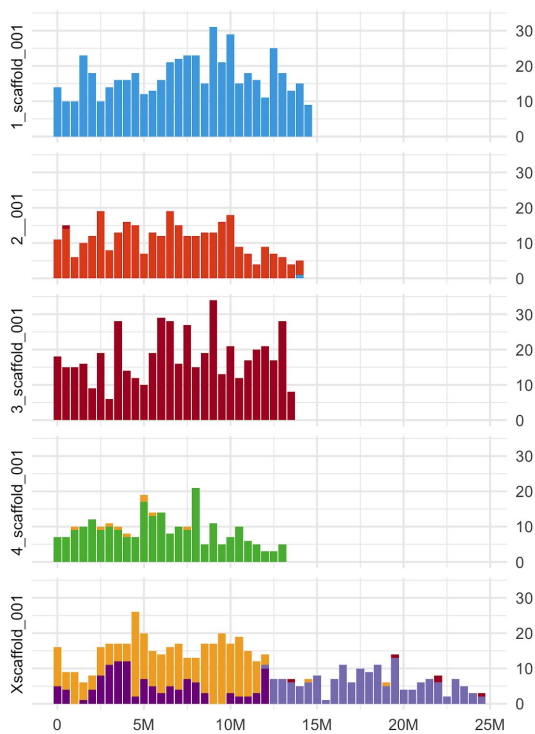

**N** *Onchocerca volvulus*

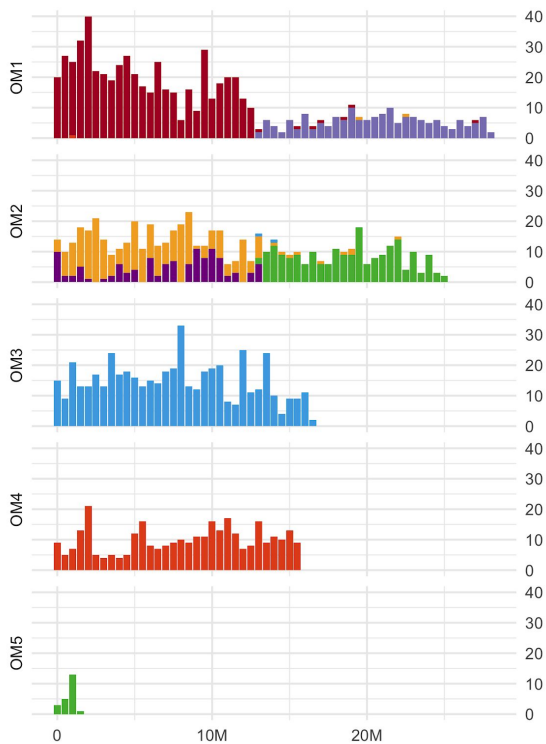





○ *Ascaris suum*

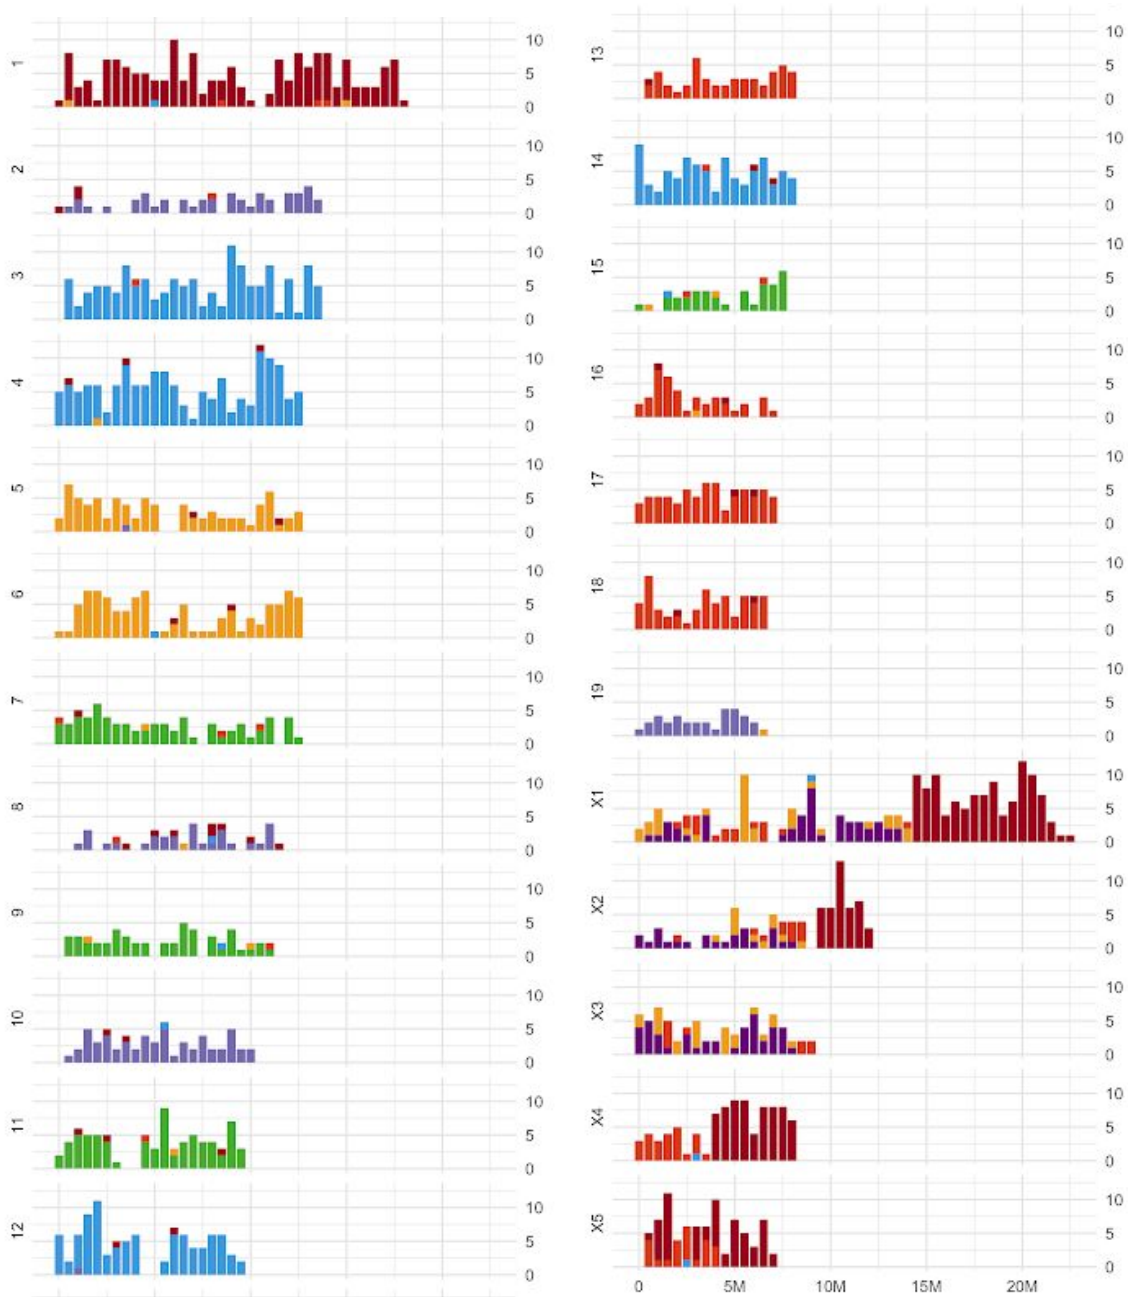



P *Heterorhabdits bacteriophora*

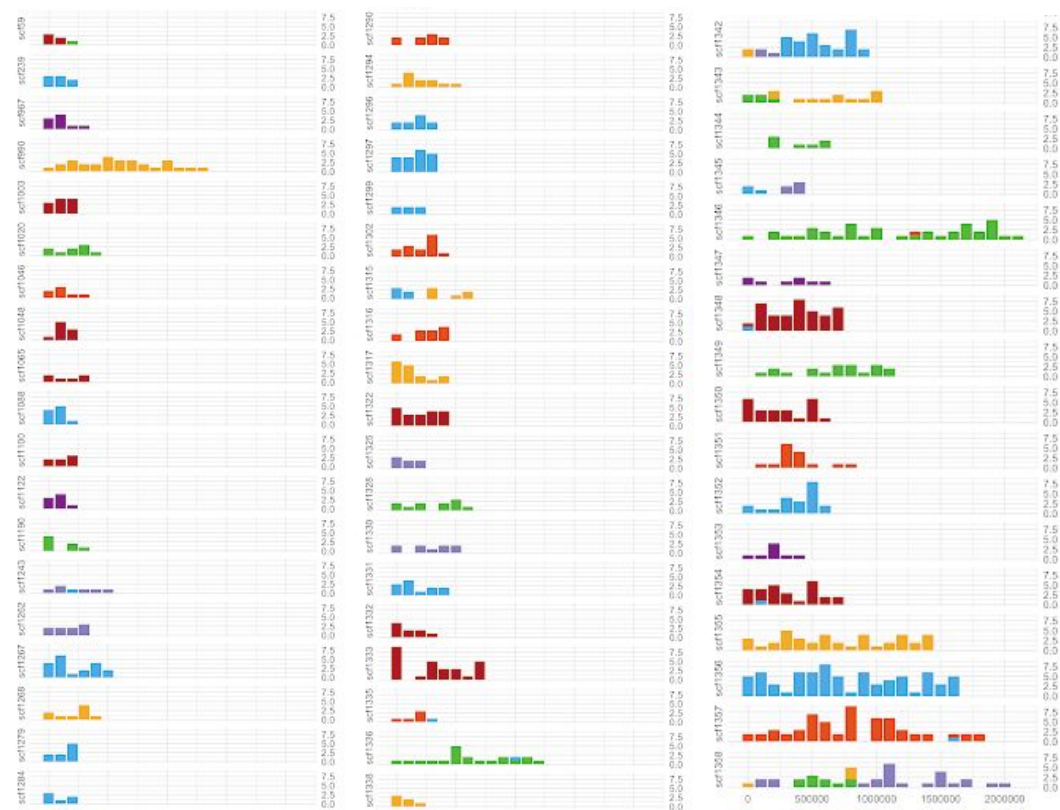



## Q *Diploscapter coronatus*

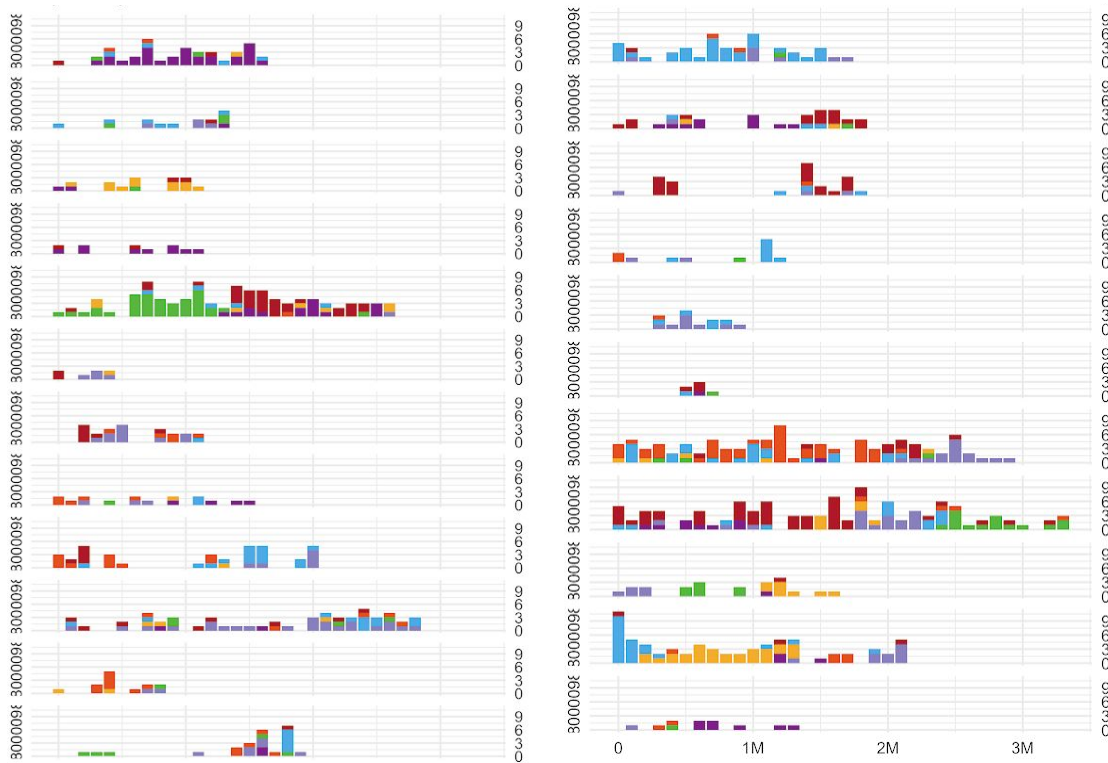

## R Legend

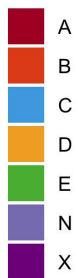

**Figure S7.** Nigon painting of Rhabditid nematode chromosomes

Higher resolution examples of main text Figure 5 with the addition of chromosomal assemblies of *Bursaphelenchus okinawaensis* and *Caenorhabditis* species. Each subgraph shows the count of loci mapped in non-overlapping 0.5 Mb windows along a chromosome as a stacked histogram coloured by Nigon origin. The X- and Y-axes are scaled to the maxima within a species in each panel (X: chromosome length, Y: Nigon-defining loci per interval) within each species. Panels P and Q include only scaffolds longer than 200 Kb and loci are counted in non-overlapping 0.1 Mb



windows. Panel Q shows only scaffolds with more than 10% of the Nigon loci being NigonX or NigonN. The legend in panel K applies to all chromosome panels.

A *Caenorhabditis briggsae*, B *Caenorhabditis inopinata*, C *Caenorhabditis nigoni*, D *Caenorhabditis remanei*, E *Caenorhabditis elegans*, F *Haemonchus contortus*, G *Auanema rhodensis*, H *Pristionchus pacificus* (Rhabditina, Diplogasteromorpha), I *Strongyloides ratti*, J *Steinernema carpocapsae*, K *Bursaphelenchus xylophilus*, L *Bursaphelenchus okinawaensis*, M *Brugia malayi*, N *Onchocerca volvulus*, O *Ascaris suum*, P *Heterorhabditis bacteriophora* and Q *Diploscapter coronatus*. Panel R shows the colour key for the other panels.
