# Supplementary material
Source: publisher figshare collection journal article supplement (https://gsajournals.figshare.com/articles/dataset/_/12982394)
Supplement: Supplementary file 10 [file 1]

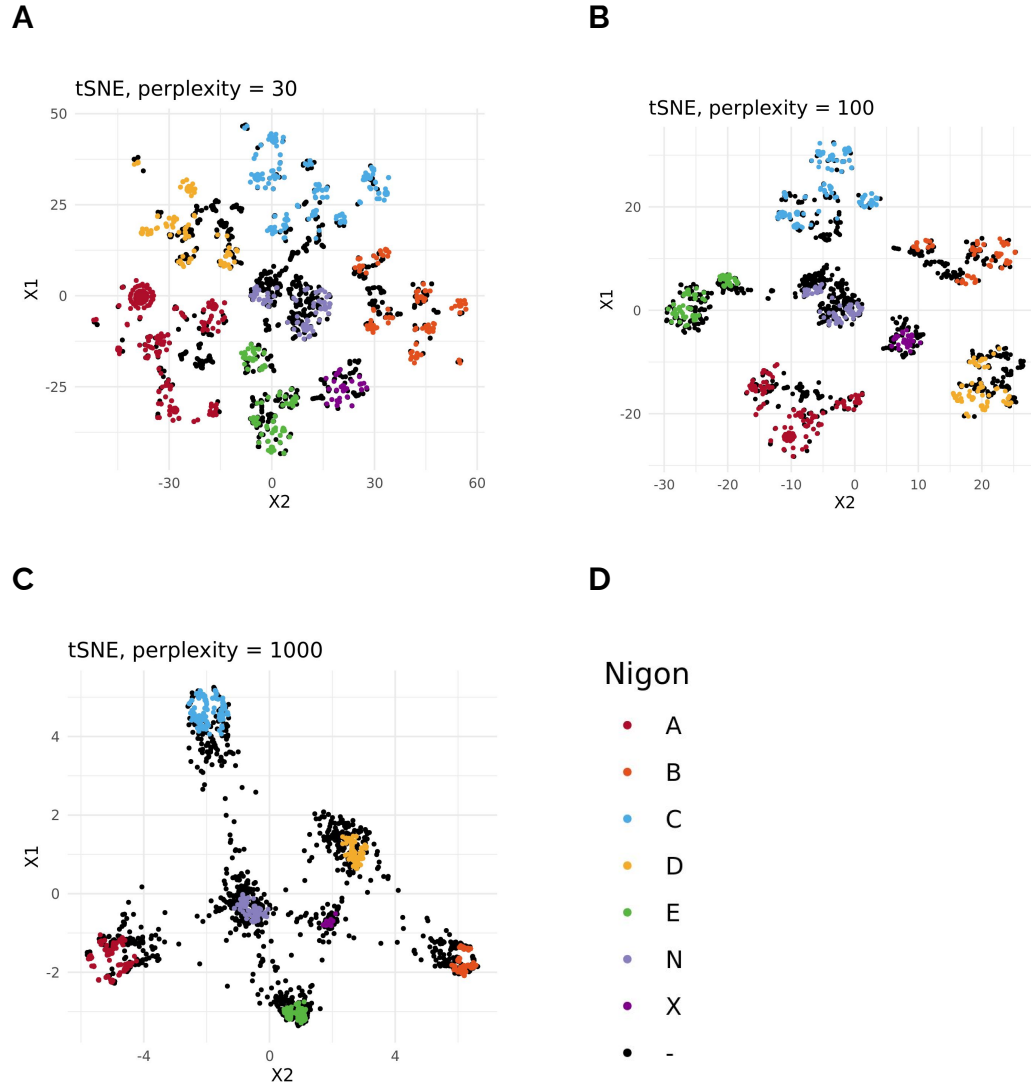

**Figure S4.** t-SNE of orthologous loci co-locations in 9 nematode species

Alternative t-SNE plots of 3412 orthologous gene families with different perplexity parameter values. A maximum of 1000 iterations were performed in all cases. Black dots denote orthologs not assigned to a Nigon unit. The legend in panel D applies to all tSNE panels. Parameters used for t-SNE, apart from the specified perplexity, are max\_iter=1000, initial\_dims=50 and theta=0.5.
